# Supplementary material for: Whole-Genome Sequencing Identifies the Egl Nine Homologue 3 (egln3/phd3) and Protein Phosphatase 1 Regulatory Inhibitor Subunit 2 (PPP1R2P1) Associated with High-Altitude Polycythemia in Tibetans at High Altitude
Source: Dis Markers. 2019 Nov 7;2019:5946461. doi: 10.1155/2019/5946461 (PMC6881591; doi:10.1155/2019/5946461)
Supplement: Supplementary Materials — Supplementary Table S1: sequence data for HAPC and control subjects. Supplementary Table S2: list of 72 nonsilent SNPs with P < 0.01 in allele frequency between cases and healthy controls in the discovery phase. Supplementary Table S3: pathway enrichment analysis on the genes with significant difference in allele frequency between 10 cases and 10 controls. Supplementary Table S4: the selected 21 SNPs for genotyping. Supplementary Table S5: characteristics of case and control subjects in the genotyping phase. Supplementary Table S6: functional annotation of SNPs correlated with rs1346902 and rs521539 (r2 > 0.8) using data from ENCODE. [file 5946461.f1.xlsx]

## Sheet: Supplementary Table S1
Whole-genome sequencing identifies two susceptibility loci associated with high altitude polycythemia in Tibetans at high altitude
Luobu Gesang, Kang Li, Lamu Gusang, Kui Li, Ciren Dawa, Yangjing Baima, Ruiwei Tian, Ma Ni, Qu Dan, A san, Gawa Gesang
Supplementary Table S1 Sequence data for HAPC and control subjects
HAPC
QC Statistics Sample	D1	D2	D3	D4	D5	D6	D8	D10	D13	D15
	WGC025333	WGC025334	WGC025335	WGC025336	WGC025337	WGC025338	WGC025340	WGC025341	WGC025344	WGC025346
Paired-end read length	150*2	150*2	150*2	150*2	150*2	150*2	150*2	150*2	150*2	150*2
Total effective data yield(Gb)	126.302	125.278	121.31	122.626	123.078	120.682	109.858	123.594	117.825	120.391
Total reads number (M)	842.01	835.19	808.73	817.51	820.52	804.55	732.38	823.96	785.5	802.61
Reads mapping rate	0.9955	0.9954	0.9968	0.9946	0.9961	0.9948	0.4068	0.9739	0.9945	0.9939
Properly paired mapping reads rate	0.9737	0.9715	0.9783	0.9725	0.9752	0.9728	0.3982	0.9484	0.9647	0.9715
No-mismatch mapping reads rate:	0.5686	0.5679	0.5424	0.6134	0.6113	0.5063	0.2711	0.56	0.5714	0.5805
Mismatch alignment bases rate:	0.0094	0.0095	0.0089	0.0083	0.0079	0.0101	0.0068	0.0094	0.0095	0.0089
Mean coverage sequencing depth	42.5	41.8	41.1	41.3	41.6	40.7	14.4	40.7	39.3	40.3
Reference genome coverage	0.9972	0.9976	0.9976	0.9973	0.9976	0.9974	0.9947	0.9975	0.9975	0.9974
Reference genome coverage >= 4X	0.9936	0.9938	0.994	0.9938	0.9942	0.9937	0.9724	0.9941	0.9938	0.9937
Reference genome coverage >= 10X	0.9846	0.9841	0.9848	0.9852	0.9853	0.9845	0.7708	0.9849	0.9837	0.9842
Reference genome coverage >= 20X	0.9486	0.9458	0.9448	0.9467	0.9476	0.9432	0.1948	0.9413	0.9354	0.9418
PCR duplication rate	0.0689	0.0713	0.0658	0.0725	0.0687	0.0684	0.0705	0.0685	0.0699	0.0781
Control
QC Statistics Sample	Z1	Z2	Z3	Z4	Z5	Z6	Z7	Z8	Z13	Z14
	WGC025347	WGC025348	WGC025349	WGC025350	WGC025351	WGC025352	WGC025353	WGC025354	WGC025359	WGC025360
Paired-end read length	150*2	150*2	150*2	150*2	150*2	150*2	150*2	150*2	150*2	150*2
Total effective data yield(Gb)	128.851	109.576	91.574	128.697	126.83	109.171	123.83	126.23	124.054	123.644
Total reads number (M)	859.01	730.5	610.49	857.98	845.53	727.8	825.53	841.55	827.03	824.29
Reads mapping rate	0.9946	0.9975	0.9963	0.9956	0.9959	0.9981	0.995	0.9944	0.9954	0.9945
Properly paired mapping reads rate	0.971	0.9821	0.9812	0.9728	0.9672	0.9825	0.9705	0.9653	0.9666	0.9762
No-mismatch mapping reads rate:	0.5371	0.6182	0.5313	0.6229	0.5647	0.6068	0.621	0.6439	0.6299	0.6411
Mismatch alignment bases rate:	0.0107	0.008	0.0135	0.0079	0.0099	0.0079	0.008	0.0073	0.0074	0.0067
Mean coverage sequencing depth	43.5	37	30.9	43.4	42.6	37	41.8	42.7	41.9	41.9
Reference genome coverage	0.9912	0.9969	0.9901	0.9972	0.9974	0.9906	0.9975	0.9974	0.9975	0.9908
Reference genome coverage >= 4X	0.9872	0.9924	0.9842	0.9937	0.994	0.9859	0.994	0.994	0.9941	0.9868
Reference genome coverage >= 10X	0.9791	0.9811	0.973	0.9851	0.9833	0.9768	0.985	0.9836	0.9843	0.9786
Reference genome coverage >= 20X	0.963	0.9217	0.8924	0.9518	0.9333	0.9421	0.9468	0.9347	0.9393	0.9596
PCR duplication rate	0.0751	0.069	0.0728	0.0743	0.081	0.0736	0.0854	0.0996	0.0927	0.0855
HAPC: high altitude polycythemia
Whole-genome sequencing identifies two susceptibility loci associated with high altitude polycythemia in Tibetans at high altitude
Luobu Gesang, Kang Li, Lamu Gusang, Kui Li, Ciren Dawa, Yangjing Baima, Ruiwei Tian, Ma Ni, Qu Dan, A san, Gawa Gesang
Supplementary Table S2: List of 72 non-silent SNVs with significant difference (P<0.01) in allele frequency between case and control in discovery phase
Chr	Pos	Ref Base	Alt Base	Pvalue	Gene Symbol	SNV class	AA_change	Frequency in 1K Genome
chr1	29631909	A	G	0.00791169	PTPRU	nonsynonymous SNV	PTPRU:NM_001195001:exon18:c.A2789G:p.N930S,PTPRU:NM_133178:exon18:c.A2789G:p.N930S,PTPRU:NM_133177:exon18:c.A2789G:p.N930S,PTPRU:NM_005704:exon19:c.A2819G:p.N940S,	0.48
chr1	152770521	G	A	0.00836173	LCE1D	nonsynonymous SNV	LCE1D:NM_178352:exon2:c.G251A:p.R84H,	0.34
chr1	177902753	G	C	0.00305645	SEC16B	nonsynonymous SNV	SEC16B:NM_033127:exon21:c.C2590G:p.P864A,	0.35
chr1	182554557	C	T	0.0012285	RNASEL	nonsynonymous SNV	RNASEL:NM_021133:exon2:c.G1385A:p.R462Q,	0.24
chr1	233515102	T	G	0.00334205	KIAA1804	nonsynonymous SNV	KIAA1804:NM_032435:exon9:c.T2350G:p.C784G,	0.34
chr1	248202344	G	C	0.00573567	OR2L2	nonsynonymous SNV	OR2L2:NM_001004686:exon1:c.G775C:p.V259L,	0.35
chr1	248525330	A	G	0.00831601	OR2T4	nonsynonymous SNV	OR2T4:NM_001004696:exon1:c.A448G:p.M150V,	---
chr1	248722777	T	A	0.00953011	OR2T29	nonsynonymous SNV	OR2T29:NM_001004694:exon1:c.A16T:p.R6W,	---
chr1	248801778	A	T	0.00791169	OR2T35	nonsynonymous SNV	OR2T35:NM_001001827:exon1:c.T782A:p.L261Q,	---
chr10	3180227	T	C	0.0012285	PITRM1	nonsynonymous SNV	PITRM1:NM_001242309:exon24:c.A2816G:p.Q939R,PITRM1:NM_014889:exon27:c.A3110G:p.Q1037R,PITRM1:NM_001242307:exon27:c.A3113G:p.Q1038R,	0.77
chr10	3200292	G	A	0.000244362	PITRM1	nonsynonymous SNV	PITRM1:NM_001242309:exon10:c.C1094T:p.A365V,PITRM1:NM_014889:exon11:c.C1190T:p.A397V,PITRM1:NM_001242307:exon11:c.C1190T:p.A397V,	0.62
chr10	3202065	T	C	0.000244362	PITRM1	nonsynonymous SNV	PITRM1:NM_001242309:exon8:c.A886G:p.I296V,PITRM1:NM_014889:exon9:c.A982G:p.I328V,PITRM1:NM_001242307:exon9:c.A982G:p.I328V,	0.62
chr10	24908686	T	C	0.00836173	ARHGAP21	nonsynonymous SNV	ARHGAP21:NM_020824:exon9:c.A2138G:p.N713S,	0.34
chr10	29784072	G	C	0.00573567	SVIL	nonsynonymous SNV	SVIL:NM_021738:exon19:c.C3703G:p.P1235A,SVIL:NM_003174:exon17:c.C2425G:p.P809A,	0.53
chr11	1013987	G	A	0.00305645	MUC6	nonsynonymous SNV	MUC6:NM_005961:exon32:c.C7054T:p.R2352W,	0.17
chr11	1027811	C	T	0.00953011	MUC6	nonsynonymous SNV	MUC6:NM_005961:exon16:c.G1855A:p.V619M,	0.32
chr11	56468044	T	G	0.003276	OR9G1,OR9G9	nonsynonymous SNV	OR9G9:NM_001013358:exon1:c.T181G:p.F61V,OR9G1:NM_001005213:exon1:c.T181G:p.F61V,	0.81
chr11	123893987	G	A	0.00831601	OR10G9	nonsynonymous SNV	OR10G9:NM_001001953:exon1:c.G268A:p.A90T,	0.2
chr12	7842932	C	T	0.00573567	GDF3	nonsynonymous SNV	GDF3:NM_020634:exon2:c.G637A:p.G213R,	0.19
chr14	36153177	T	C	0.00953011	RALGAPA1	nonsynonymous SNV	RALGAPA1:NM_014990:exon20:c.A2791G:p.T931A,RALGAPA1:NM_001283044:exon21:c.A2932G:p.T978A,RALGAPA1:NM_194301:exon20:c.A2791G:p.T931A,RALGAPA1:NM_001283043:exon21:c.A2830G:p.T944A,	0.61
chr14	60585131	A	G	0.00334205	PCNXL4	nonsynonymous SNV	PCNXL4:NM_022495:exon6:c.A961G:p.K321E,	0.34
chr14	60591887	G	A	0.00334205	PCNXL4	nonsynonymous SNV	PCNXL4:NM_022495:exon8:c.G2296A:p.G766S,	0.34
chr15	78390909	C	T	0.0012285	SH2D7	nonsynonymous SNV	SH2D7:NM_001101404:exon4:c.C616T:p.R206W,	0.13
chr16	70972595	T	C	0.00305645	HYDIN	nonsynonymous SNV	HYDIN:NM_001270974:exon44:c.A6917G:p.E2306G,	0.45
chr17	7751050	C	T	0.00831601	KDM6B	nonsynonymous SNV	KDM6B:NM_001080424:exon11:c.C1444T:p.P482S,	0.23
chr17	8700778	G	A	0.00831601	MFSD6L	nonsynonymous SNV	MFSD6L:NM_152599:exon1:c.C1661T:p.S554L,	0.1
chr17	56435885	G	T	0.00384753	RNF43	nonsynonymous SNV	RNF43:NM_017763:exon9:c.C1252A:p.L418M,	0.45
chr19	37487873	C	A	0.00831601	ZNF568	nonsynonymous SNV	ZNF568:NM_001204839:exon9:c.C1088A:p.A363E,ZNF568:NM_001204838:exon10:c.C1280A:p.A427E,	0.26
chr19	51297825	G	A	0.00106455	ACPT	nonsynonymous SNV	ACPT:NM_033068:exon9:c.G973A:p.A325T,	0.58
chr19	51297826	C	A	0.00106455	ACPT	nonsynonymous SNV	ACPT:NM_033068:exon9:c.C974A:p.A325D,	0.58
chr19	51301395	C	T	0.00305645	C19orf48	nonsynonymous SNV	C19orf48:NM_199250:exon4:c.G311A:p.G104E,C19orf48:NM_001290151:exon4:c.G311A:p.G104E,C19orf48:NM_001290149:exon6:c.G311A:p.G104E,C19orf48:NM_001290152:exon4:c.G311A:p.G104E,C19orf48:NM_032712:exon4:c.G311A:p.G104E,C19orf48:NM_001290153:exon5:c.G311A:p.G104E,C19orf48:NM_001290154:exon5:c.G311A:p.G104E,C19orf48:NM_001290150:exon3:c.G311A:p.G104E,C19orf48:NM_001290155:exon4:c.G311A:p.G104E,C19orf48:…	0.67
chr19	51301456	G	A	0.00305645	C19orf48	nonsynonymous SNV	C19orf48:NM_199250:exon4:c.C250T:p.R84C,C19orf48:NM_001290151:exon4:c.C250T:p.R84C,C19orf48:NM_001290149:exon6:c.C250T:p.R84C,C19orf48:NM_001290152:exon4:c.C250T:p.R84C,C19orf48:NM_032712:exon4:c.C250T:p.R84C,C19orf48:NM_001290153:exon5:c.C250T:p.R84C,C19orf48:NM_001290154:exon5:c.C250T:p.R84C,C19orf48:NM_001290150:exon3:c.C250T:p.R84C,C19orf48:NM_001290155:exon4:c.C250T:p.R84C,C19orf48:NM_199249…	0.67
chr19	51323232	T	C	0.00364103	KLK1	nonsynonymous SNV	KLK1:NM_002257:exon4:c.A556G:p.K186E,	0.59
chr2	29226512	A	G	0.00953011	FAM179A	nonsynonymous SNV	FAM179A:NM_199280:exon6:c.A794G:p.Q265R,	0.81
chr2	37579971	C	T	0.00831601	QPCT	nonsynonymous SNV	QPCT:NM_012413:exon2:c.C160T:p.R54W,	0.33
chr2	43797619	C	T	0.00831601	THADA	nonsynonymous SNV	THADA:NM_022065:exon14:c.G2095A:p.V699I,THADA:NM_001271643:exon14:c.G2095A:p.V699I,THADA:NM_001271644:exon14:c.G2095A:p.V699I,THADA:NM_001083953:exon14:c.G2095A:p.V699I,	0.27
chr2	118575215	C	G	0.00836173	DDX18	nonsynonymous SNV	DDX18:NM_006773:exon2:c.C281G:p.T94S,	0.22
chr2	131220864	T	A	0.003276	POTEI	nonsynonymous SNV	POTEI:NM_001277406:exon15:c.A2753T:p.Y918F,	---
chr2	179611711	C	A	0.00831601	TTN	nonsynonymous SNV	TTN:NM_133379:exon46:c.G15416T:p.R5139M,	0.22
chr2	179615887	T	C	0.00831601	TTN	nonsynonymous SNV	TTN:NM_133379:exon46:c.A11240G:p.D3747G,	0.77
chr2	179620951	C	T	0.00831601	TTN	nonsynonymous SNV	TTN:NM_001267550:exon46:c.G11252A:p.G3751D,TTN:NM_133437:exon44:c.G10739A:p.G3580D,	0.77
chr2	179623758	C	T	0.00831601	TTN	nonsynonymous SNV	TTN:NM_133379:exon44:c.G10256A:p.S3419N,TTN:NM_133378:exon44:c.G10256A:p.S3419N,TTN:NM_001267550:exon44:c.G10256A:p.S3419N,TTN:NM_001256850:exon44:c.G10256A:p.S3419N,TTN:NM_003319:exon43:c.G10118A:p.S3373N,TTN:NM_133432:exon43:c.G10118A:p.S3373N,TTN:NM_133437:exon43:c.G10118A:p.S3373N,	0.78
chr2	179629461	C	T	0.00831601	TTN	nonsynonymous SNV	TTN:NM_133379:exon42:c.G9781A:p.V3261M,TTN:NM_133378:exon42:c.G9781A:p.V3261M,TTN:NM_001267550:exon42:c.G9781A:p.V3261M,TTN:NM_001256850:exon42:c.G9781A:p.V3261M,TTN:NM_003319:exon41:c.G9643A:p.V3215M,TTN:NM_133432:exon41:c.G9643A:p.V3215M,TTN:NM_133437:exon41:c.G9643A:p.V3215M,	0.78
chr2	179641975	C	T	0.00831601	TTN	nonsynonymous SNV	TTN:NM_133379:exon27:c.G4715A:p.R1572Q,TTN:NM_133378:exon27:c.G4715A:p.R1572Q,TTN:NM_001267550:exon27:c.G4715A:p.R1572Q,TTN:NM_001256850:exon27:c.G4715A:p.R1572Q,TTN:NM_003319:exon26:c.G4577A:p.R1526Q,TTN:NM_133432:exon26:c.G4577A:p.R1526Q,TTN:NM_133437:exon26:c.G4577A:p.R1526Q,	0.21
chr20	3218634	G	C	0.00836173	SLC4A11	nonsynonymous SNV	SLC4A11:NM_001174090:exon1:c.C77G:p.P26R,	0.67
chr20	4229514	T	C	0.00831601	ADRA1D	nonsynonymous SNV	ADRA1D:NM_000678:exon1:c.A91G:p.S31G,	0.2
chr20	5933108	C	A	0.00953011	MCM8	nonsynonymous SNV	MCM8:NM_032485:exon3:c.C187A:p.Q63K,MCM8:NM_001281520:exon3:c.C187A:p.Q63K,MCM8:NM_182802:exon3:c.C187A:p.Q63K,MCM8:NM_001281522:exon3:c.C187A:p.Q63K,MCM8:NM_001281521:exon3:c.C187A:p.Q63K,	0.17
chr20	62326110	A	C	0.00573567	RTEL1	nonsynonymous SNV	RTEL1:NM_016434:exon32:c.A3126C:p.Q1042H,RTEL1:NM_001283010:exon31:c.A2457C:p.Q819H,RTEL1:NM_001283009:exon32:c.A3126C:p.Q1042H,RTEL1:NM_032957:exon32:c.A3198C:p.Q1066H,	0.35
chr20	62373707	G	T	0.00573567	SLC2A4RG	nonsynonymous SNV	SLC2A4RG:NM_020062:exon6:c.G699T:p.E233D,	0.37
chr22	20458029	A	C	0.003276	RIMBP3	nonsynonymous SNV	RIMBP3:NM_015672:exon1:c.T3273G:p.D1091E,	---
chr22	50528569	A	T	0.00334205	MOV10L1	nonsynonymous SNV	MOV10L1:NM_018995:exon1:c.A52T:p.T18S,MOV10L1:NM_001164104:exon1:c.A52T:p.T18S,	0.31
chr4	22404391	G	A	0.00831601	GPR125	nonsynonymous SNV	GPR125:NM_145290:exon15:c.C2264T:p.A755V,	0.05
chr4	41672759	C	T	0.00831601	LIMCH1	nonsynonymous SNV	LIMCH1:NM_001289124:exon16:c.C1754T:p.P585L,LIMCH1:NM_001289122:exon16:c.C2231T:p.P744L,	0.13
chr6	167728774	T	C	0.00953011	UNC93A	nonsynonymous SNV	UNC93A:NM_001143947:exon7:c.T1082C:p.M361T,UNC93A:NM_018974:exon8:c.T1208C:p.M403T,	0.72
chr8	6873603	T	G	0.003276	DEFA1,DEFA1B,DEFA3	nonsynonymous SNV	DEFA1:NM_004084:exon3:c.A194C:p.D65A,DEFA1B:NM_001042500:exon3:c.A194C:p.D65A,DEFA3:NM_005217:exon3:c.A194C:p.D65A,	---
chr8	11990195	C	T	4.51e-05	USP17L7	nonsynonymous SNV	USP17L7:NM_001256869:exon1:c.G1324A:p.E442K,	0.78
chr8	11991107	T	G	0.00043592	USP17L7	nonsynonymous SNV	USP17L7:NM_001256869:exon1:c.A412C:p.S138R,	0.88
chr8	11991110	G	A	0.003276	USP17L7	nonsynonymous SNV	USP17L7:NM_001256869:exon1:c.C409T:p.H137Y,	0.88
chr8	104432545	A	G	0.00573567	DCAF13	nonsynonymous SNV	DCAF13:NM_015420:exon2:c.A580G:p.I194V,	0.34
chr9	107360826	A	G	0.00791169	OR13C5	nonsynonymous SNV	OR13C5:NM_001004482:exon1:c.T869C:p.M290T,	0.58
chr9	107360851	T	C	0.00791169	OR13C5	nonsynonymous SNV	OR13C5:NM_001004482:exon1:c.A844G:p.I282V,	0.58
chr9	107361312	T	C	0.00334205	OR13C5	nonsynonymous SNV	OR13C5:NM_001004482:exon1:c.A383G:p.N128S,	0.39
chr9	107361346	C	T	0.00123186	OR13C5	nonsynonymous SNV	OR13C5:NM_001004482:exon1:c.G349A:p.V117M,	0.54
chr9	107361642	G	A	0.00791169	OR13C5	nonsynonymous SNV	OR13C5:NM_001004482:exon1:c.C53T:p.S18F,	0.38
chr9	107367431	A	T	0.00364103	OR13C2	nonsynonymous SNV	OR13C2:NM_001004481:exon1:c.T478A:p.S160T,	0.53
chr9	107380414	C	A	0.00953011	OR13C9	nonsynonymous SNV	OR13C9:NM_001001956:exon1:c.G72T:p.E24D,	0.58
chrX	2825403	A	G	0.00791169	ARSD	nonsynonymous SNV	ARSD:NM_001669:exon10:c.T1691C:p.M564T,	0.46
chrX	8138182	A	G	0.00953011	VCX2	nonsynonymous SNV	VCX2:NM_016378:exon3:c.T311C:p.L104P,	0.68
chrX	140967165	T	C	0.00791169	MAGEC3	nonsynonymous SNV	MAGEC3:NM_138702:exon3:c.T463C:p.S155P,	0.46
chrX	140967195	T	A	0.00791169	MAGEC3	nonsynonymous SNV	MAGEC3:NM_138702:exon3:c.T493A:p.L165M,	0.46
chrX	147088249	C	T	0.00334205	FMR1NB	nonsynonymous SNV	FMR1NB:NM_152578:exon3:c.C425T:p.A142V,	0.69
Whole-genome sequencing identifies two susceptibility loci associated with high altitude polycythemia in Tibetans at high altitude
Luobu Gesang, Kang Li, Lamu Gusang, Kui Li, Ciren Dawa, Yangjing Baima, Ruiwei Tian, Ma Ni, Qu Dan, A san, Gawa Gesang
Supplementary Table S3: Pathway enrichment analysis on the genes with significant difference in allele frequency between 10 cases and 10 controls
KEGG ID	KEGG NAME	KEGG CLASS	Number_Genes_within_mylist_and_KEGG	Number_Genes_within_reflist_and_KEGG	Number_Genes_within_mylist	Number_Genes_within_reflist	GeneSymbols_within_mylist_and_KEGG	Enrichment_score	Pvalue	Qvalue
hsa04724	Glutamatergic synapse	Nervous system	39	115	1192	6253	GRIK2,DLGAP1,TRPC1,GRIN2A,ADCY1,GRIN3A,CACNA1C,GNAI1,GRIK3,GNG7,SHANK2,GRIN2C,GRIK4,GRIN2B,ADCY8,ITPR2,CACNA1D,GRM5,SLC38A1,GLS2,SLC1A7,GNAS,GRM6,PRKACB,PLCB4,KCNJ3,GRM7,GRIN3B,GRIA4,PLA2G4E,ADCY5,PPP3CC,PRKX,GRIA3,PLCB1,CACNA1A,HOMER1,GNAQ,PRKCA	1.77901	7.78927e-05	0.0102429
hsa04360	Axon guidance	Development	43	130	1192	6253	MET,EFNB1,EPHA4,NCK2,PAK7,GNAI1,SRGAP1,PLXNB2,UNC5D,SLIT2,RGS3,NFATC1,EPHA5,SLIT3,ROBO1,ABLIM2,SEMA5B,NTN1,NFATC2,LRRC4C,EPHB1,EFNA5,NGEF,UNC5C,SEMA6B,LIMK1,EPHB2,NRP1,EPHA2,SEMA3A,SEMA3E,KRAS,PPP3CC,SRGAP2,ROCK1,PLXNA2,SEMA6C,SEMA3D,ROBO2,SRGAP3,SEMA5A,DCC,SEMA3C	1.73515	6.37482e-05	0.0102429
hsa04666	Fc gamma R-mediated phagocytosis	Immune system	32	90	1192	6253	PIK3CB,NCF1,AMPH,LAT,PIK3R1,FCGR2B,PRKCD,MYO10,ASAP3,GSN,WASF3,PRKCE,PLCG2,LYN,PPAP2B,CRKL,WASF1,ARPC3,ASAP2,ASAP1,PIP5K1C,PIP5K1B,LIMK1,SPHK2,PLA2G4E,SCIN,PPAP2A,RAF1,PIP5K1A,VAV2,PRKCA,VAV1	1.86518	0.000130269	0.0114202
hsa04020	Calcium signaling pathway	Signal transduction	53	180	1192	6253	NTSR1,SLC8A1,CD38,TACR1,ATP2B2,GRIN2A,ADCY1,CACNA1C,EGFR,ADORA2B,TACR3,PHKG1,CHRM3,CHRNA7,ERBB4,HTR2C,CACNA1E,SLC25A5,CYSLTR2,GRIN2C,ADCY8,ITPR2,CAMK2G,CACNA1D,LHCGR,PLCG2,GRM5,PLCD3,GNAS,EDNRA,PRKACB,ADRA1D,PLCB4,MYLK,PLCZ1,CAMK4,HTR2A,SPHK2,RYR3,CACNA1B,PPP3CC,P2RX5,PRKX,GNA15,ADRB2,PDE1A,PLCB1,CACNA1A,GNAQ,RYR2,GNA14,ATP2A2,PRKCA	1.5446	0.000256829	0.0149616
hsa05032	Morphine addiction	Substance dependence	31	91	1192	6253	GRK5,KCNJ6,ADCY1,GNAI1,PDE10A,GNG7,GABRB2,GABRA2,ADCY8,GABRA3,GNAS,PDE4C,GABRG3,PDE4D,PRKACB,PDE3A,KCNJ3,PDE4B,GABRB3,GABRG2,GABBR2,PDE3B,ADCY5,CACNA1B,GABRB1,PDE8A,PRKX,PDE1A,CACNA1A,OPRM1,PRKCA	1.78703	0.00039421	0.0149616
hsa05146	Amoebiasis	Infectious diseases: Parasitic	35	107	1192	6253	COL4A5,PIK3CB,MUC2,ITGB2,LAMA1,ADCY1,PIK3R1,COL24A1,COL11A1,TGFB2,LAMA2,ACTN2,IL6,ITGAM,COL3A1,CXCL1,TLR4,COL5A1,GNAS,PRKACB,COL5A3,COL4A2,PLCB4,COL4A1,CD1D,PRKX,GNA15,LAMC1,PLCB1,SERPINB6,GNAQ,GNA14,LAMA4,PRKCA,CSF2	1.71592	0.000398217	0.0149616
hsa05033	Nicotine addiction	Substance dependence	17	39	1192	6253	GRIN2A,GRIN3A,CHRNA7,GRIN2C,GABRB2,GRIN2B,GABRA2,GABRA3,GABRG3,GABRB3,GRIN3B,GABRG2,GRIA4,CACNA1B,GABRB1,GRIA3,CACNA1A	2.28663	0.000357368	0.0149616
hsa05412	Arrhythmogenic right ventricular cardiomyopathy (ARVC)	Cardiovascular diseases	26	73	1192	6253	SLC8A1,CACNG2,PKP2,CACNA1C,CACNB2,DMD,CACNG6,LAMA2,ACTN2,CACNA1D,TCF7L2,ITGA9,CACNA2D1,ITGA6,ITGB8,DAG1,TCF7L1,SGCD,CDH2,CACNG4,SGCG,CTNNA3,CACNG3,RYR2,CTNNA2,ATP2A2	1.86837	0.000542683	0.0178407
hsa05414	Dilated cardiomyopathy	Cardiovascular diseases	29	89	1192	6253	SLC8A1,CACNG2,ADCY1,CACNA1C,CACNB2,DMD,CACNG6,TGFB2,LAMA2,ADCY8,CACNA1D,ITGA9,CACNA2D1,GNAS,ITGA6,ITGB8,PRKACB,DAG1,SGCD,ADCY5,TNNI3,CACNG4,PRKX,TPM1,SGCG,CACNG3,RYR2,TTN,ATP2A2	1.70931	0.00134399	0.0318813
hsa04144	Endocytosis	Transport and catabolism	55	200	1192	6253	EPN2,MET,GRK5,GRK1,LDLR,RAB11FIP4,CXCR1,EGFR,VPS4B,PSD4,HLA-C,AP2A2,SMAD6,PSD3,ERBB4,TGFB2,SMAD3,NEDD4,ASAP3,HLA-A,VPS37C,IGF1R,TSG101,RABEP1,HLA-B,PIP5KL1,VTA1,IQSEC2,ASAP2,CLTCL1,ASAP1,NEDD4L,PDCD6IP,FGFR4,PIP5K1C,SMAD2,PRKCZ,HLA-G,SRC,PIP5K1B,CBLB,FGFR2,PIP5K1A,ZFYVE20,ADRB2,TFRC,RAB31,CLTC,DNAJC6,KDR,DNM3,DAB2,IL2RA,GIT2,IL2RB	1.4426	0.00115944	0.0318813
hsa04911	Insulin secretion	Endocrine system	28	85	1192	6253	ADCY1,CACNA1C,ADCYAP1,CHRM3,KCNJ11,ABCC8,ATP1B2,ADCY8,CAMK2G,CREB3L2,CACNA1D,GNAS,RAB3A,PRKACB,PLCB4,KCNN2,ADCY5,GIP,SNAP25,PRKX,TRPM4,CREB5,PLCB1,GNAQ,KCNU1,RYR2,RIMS2,PRKCA	1.72803	0.00135046	0.0318813
hsa04810	Regulation of actin cytoskeleton	Cell motility	57	211	1192	6253	PIK3CB,ITGB2,PAK7,EGFR,PPP1CB,FGF13,PIK3R1,CHRM3,BAIAP2,DIAPH2,RRAS2,GSN,FGF4,BCAR1,ACTN2,FGF14,ITGAM,ARHGEF6,FGF3,ITGA9,CRKL,WASF1,EZR,ARPC3,ITGA6,ITGB8,FGFR4,PIP5K1C,GNA13,DOCK1,MYL12B,PIP4K2A,MYLK,SRC,FGD3,PIP5K1B,APC,LIMK1,IQGAP2,SSH2,ARHGEF7,CYFIP1,SCIN,MYH9,KRAS,FGF19,PPP1CC,RAF1,FGFR2,PIP5K1A,MYH10,VAV2,TMSB4Y,ROCK1,FGF9,SLC9A1,VAV1	1.41711	0.00145466	0.0318813
hsa04726	Serotonergic synapse	Nervous system	34	112	1192	6253	HTR3A,KCNJ6,TRPC1,CACNA1C,GNAI1,GNG7,HTR2C,GABRB2,TPH1,ITPR2,CACNA1D,CYP2C8,APP,GNAS,PRKACB,PLCB4,KCNJ3,KCNN2,KCND2,HTR2A,PLA2G4E,ADCY5,KRAS,CACNA1B,GABRB1,RAF1,PRKX,HTR1F,PLCB1,HTR1B,CACNA1A,GNAQ,PTGS1,PRKCA	1.59248	0.00203967	0.041264
hsa05200	Pathways in cancer	Cancers: Overview	80	325	1192	6253	COL4A5,MET,CCNE1,PIK3CB,MAPK10,STAT5A,SHH,VEGFA,LAMA1,FOXO1,EGFR,BCR,STAT5B,MECOM,E2F2,FGF13,CDKN1A,PIK3R1,NFKBIA,TGFB2,LAMA2,AXIN1,SMAD3,RUNX1,VEGFC,ZBTB16,STAT3,FGF4,RBX1,DAPK2,IL6,FGF14,FASLG,PLCG2,AXIN2,IGF1R,PAX8,FGF3,TCF7L2,JAK1,EGLN3,KITLG,CRKL,E2F3,APPL1,MITF,RARB,TRAF2,CCDC6,IKBKG,ITGA6,RUNX1T1,BIRC2,COL4A2,TCF7L1,SMAD2,WNT11,COL4A1,GLI2,EPAS1,APC,KRAS,CBLB,RAF1,FGFR2,BMP4,GLI3,CTNNA3,LA…	1.29128	0.00230586	0.0430566
hsa04720	Long-term potentiation	Nervous system	23	68	1192	6253	GRIN2A,ADCY1,RPS6KA2,CACNA1C,PPP1CB,GRIN2C,GRIN2B,ADCY8,ITPR2,CAMK2G,GRM5,PRKACB,PLCB4,CAMK4,KRAS,PPP3CC,PPP1CC,RAF1,PRKX,PLCB1,GNAQ,PRKCA,RPS6KA3	1.77432	0.0024557	0.0430566
hsa04723	Retrograde endocannabinoid signaling	Nervous system	31	101	1192	6253	MAPK10,KCNJ6,ADCY1,CACNA1C,GNAI1,GNG7,CNR1,GABRB2,GABRA2,ADCY8,ITPR2,CACNA1D,GRM5,GABRA3,GABRG3,PRKACB,PLCB4,KCNJ3,GABRB3,GABRG2,GRIA4,ADCY5,CACNA1B,GABRB1,PRKX,NAPEPLD,GRIA3,PLCB1,CACNA1A,GNAQ,PRKCA	1.6101	0.00266168	0.0437514
hsa04972	Pancreatic secretion	Digestive system	29	94	1192	6253	CD38,CELA3A,ATP2B2,TRPC1,ADCY1,CELA3B,CPA3,CHRM3,SLC4A4,SLC26A3,TPCN2,ATP1B2,ADCY8,ITPR2,PLA2G5,PRSS1,GNAS,KCNQ1,PLCB4,PLA2G1B,PLA2G2D,ADCY5,CPB2,PLCB1,GNAQ,SLC9A1,RYR2,ATP2A2,PRKCA	1.61839	0.00334952	0.051819
hsa05410	Hypertrophic cardiomyopathy (HCM)	Cardiovascular diseases	26	82	1192	6253	SLC8A1,CACNG2,CACNA1C,CACNB2,DMD,CACNG6,TGFB2,LAMA2,PRKAG2,IL6,ACE,CACNA1D,ITGA9,CACNA2D1,ITGA6,ITGB8,DAG1,SGCD,TNNI3,CACNG4,TPM1,SGCG,CACNG3,RYR2,TTN,ATP2A2	1.6633	0.0035992	0.0525883
hsa04976	Bile secretion	Digestive system	23	71	1192	6253	AQP9,LDLR,ADCY1,SLC4A4,ABCC4,SLCO1B7,SLC22A1,ABCC3,ATP1B2,SCARB1,ADCY8,ABCG2,GNAS,SLCO1B1,PRKACB,HMGCR,KCNN2,ADCY5,PRKX,SULT2A1,SLCO1A2,SLC9A1,ABCG5	1.69935	0.00452905	0.0544524
hsa04010	MAPK signaling pathway	Signal transduction	64	254	1192	6253	PTPRR,DUSP4,PTPN5,MAPK10,TAB2,CACNG2,MAP2K4,RPS6KA2,CACNA1C,NTRK2,EGFR,RPS6KA4,RASGRP3,CACNB2,MECOM,FGF13,CACNG6,TGFB2,DUSP22,CACNA1E,MAP4K1,RRAS2,FGF4,FGF14,FASLG,CACNA1D,NFATC2,FGF3,RASGRF2,CRKL,CACNA2D1,TRAF2,IKBKG,DUSP14,STK3,PRKACB,FGFR4,NTF3,RAPGEF2,MAPK8IP3,NGF,BDNF,PLA2G4E,KRAS,CACNA1B,CACNG4,MAPT,FGF19,PPP3CC,RAF1,FGFR2,PRKX,FLNB,MAP2K5,RASGRP1,PPM1B,FGF9,CACNA1A,CACNG3,DUSP16,TAOK1,PRKC…	1.32178	0.00421064	0.0544524
hsa05031	Amphetamine addiction	Substance dependence	22	67	1192	6253	GRIN2A,GRIN3A,CACNA1C,PPP1CB,GRIN2C,GRIN2B,CAMK2G,CREB3L2,CACNA1D,GNAS,PRKACB,CAMK4,GRIN3B,GRIA4,ADCY5,PPP3CC,PPP1CC,PRKX,GRIA3,CREB5,ARC,PRKCA	1.7225	0.00455496	0.0544524
hsa04270	Vascular smooth muscle contraction	Circulatory system	34	117	1192	6253	NPR1,ADCY1,CACNA1C,PPP1CB,ADORA2B,PRKCD,ADCY8,ITPR2,PRKCE,CACNA1D,PLA2G5,GNAS,EDNRA,PRKACB,ADRA1D,GNA13,PLCB4,PLA2G1B,MYLK,PLA2G2D,PRKCH,PLA2G4E,ADCY5,PPP1CC,RAF1,PRKX,ROCK1,PLCB1,PRKG1,GUCY1A2,GNAQ,KCNU1,NPR2,PRKCA	1.52442	0.00440783	0.0544524
hsa04510	Focal adhesion	Cell communication	53	204	1192	6253	COL4A5,MET,PIK3CB,MAPK10,VEGFA,LAMA1,PARVB,PAK7,EGFR,CAPN2,PPP1CB,PIK3R1,COL24A1,COL11A1,LAMA2,PARVA,VEGFC,BCAR1,SHC3,ACTN2,COL3A1,IGF1R,ITGA9,COL6A1,COL5A1,RELN,CRKL,ITGA6,ITGB8,BIRC2,PIP5K1C,DOCK1,COL5A3,COL4A2,MYL12B,TLN2,MYLK,SRC,COL4A1,PPP1CC,RAF1,VWF,FLNB,VAV2,LAMC1,CCND3,ROCK1,KDR,TNC,THBS2,LAMA4,PRKCA,VAV1	1.36288	0.00515825	0.0589835
hsa04713	Circadian entrainment	Environmental adaptation	28	93	1192	6253	KCNJ6,GRIN2A,ADCY1,CACNA1C,GNAI1,GNG7,PER1,GRIN2C,GRIN2B,ADCY8,CAMK2G,CACNA1D,GNAS,PRKACB,PLCB4,KCNJ3,GRIA4,RYR3,ADCY5,PRKX,PER2,GRIA3,PLCB1,PRKG1,GUCY1A2,GNAQ,RYR2,PRKCA	1.57938	0.00569409	0.0623977
hsa00534	Glycosaminoglycan biosynthesis - heparan sulfate / heparin	Glycan biosynthesis and metabolism	10	23	1192	6253	HS3ST3A1,NDST3,HS6ST1,HS3ST2,NDST2,HS6ST3,HS3ST1,HS3ST3B1,XYLT1,NDST4	2.28078	0.00611666	0.0643473
hsa04070	Phosphatidylinositol signaling system	Signal transduction	24	78	1192	6253	PIK3CB,IMPAD1,DGKQ,CDS2,PIK3R1,PIK3C3,PIK3C2A,DGKB,ITPR2,PLCG2,INPP4B,DGKI,PLCD3,ITPK1,PI4KB,IMPA2,PIP5K1C,PLCB4,PIP4K2A,PLCZ1,PIP5K1B,PIP5K1A,PLCB1,PRKCA	1.61409	0.0076726	0.0776113
hsa04540	Gap junction	Cell communication	26	87	1192	6253	CDK1,TUBA3E,ADCY1,GNAI1,EGFR,HTR2C,ADCY8,ITPR2,GRM5,GNAS,PRKACB,PLCB4,SRC,HTR2A,ADCY5,KRAS,RAF1,PRKX,TJP1,TUBB2A,MAP2K5,PLCB1,PRKG1,GUCY1A2,GNAQ,PRKCA	1.56771	0.00845011	0.0790209
hsa00250	Alanine, aspartate and glutamate metabolism	Amino acid metabolism	12	31	1192	6253	GOT2,GLUD2,AGXT2,ASNS,GAD1,GLS2,ASL,CPS1,ASPA,ADSSL1,CAD,GPT2	2.03063	0.00831219	0.0790209
hsa04080	Neuroactive ligand-receptor interaction	Signaling molecules and interaction	66	272	1192	6253	NTSR1,LPAR4,THRB,TACR1,GRIK2,GRIN2A,GRIN3A,CRHR1,P2RY10,GRIK3,ADORA2B,PLG,TACR3,CHRM3,CHRNA7,PRL,HTR2C,GLRA2,CYSLTR2,GALR1,GRIN2C,GRIK4,CNR1,LEPR,GABRB2,GRIN2B,GABRA2,LHCGR,S1PR1,GRM5,GPR50,GABRA3,PRSS1,EDNRA,OPRK1,GRM6,FSHR,GABRG3,ADRA1D,P2RY14,MC4R,GRID2,GABRB3,GRM7,GRIN3B,GABRG2,GABBR2,NPY4R,GRIA4,HTR2A,NPBWR2,AGTR2,ADRA2C,GABRB1,P2RX5,ADRB2,GRIA3,VIPR2,HTR1F,HTR1B,PTH2R,NPBWR1,PRLR,OPRM1,CHRN…	1.27288	0.00871333	0.0790209
hsa04730	Long-term depression	Nervous system	19	59	1192	6253	CRHR1,GNAI1,ITPR2,LYN,IGF1R,GNAS,GNA13,PLCB4,GRID2,PLA2G4E,KRAS,RAF1,GRIA3,PLCB1,PRKG1,GUCY1A2,CACNA1A,GNAQ,PRKCA	1.68933	0.0102198	0.0867037
hsa05202	Transcriptional misregulation in cancer	Cancers: Overview	43	164	1192	6253	PAX7,ZEB1,CDK14,ERG,MET,MLF1,TSPAN7,FLI1,FOXO1,NCOR1,CDKN1A,MAF,IGFBP3,KLF3,GOLPH3,RUNX1,ZBTB16,SUPT3H,MLLT3,IL6,ITGAM,IGF1R,PAX8,PBX1,ETV7,RUNX1T1,BCL6,CD86,FUT8,HHEX,GZMB,ETV1,AFF1,WT1,PER2,GRIA3,TMPRSS2,DEFA3,SPINT1,PROM1,TCF3,IL2RB,CSF2	1.37542	0.0101618	0.0867037
hsa00562	Inositol phosphate metabolism	Carbohydrate metabolism	19	60	1192	6253	PIK3CB,IMPAD1,PIK3C3,PIK3C2A,PLCG2,INPP4B,PLCD3,PIP5KL1,ITPK1,PI4KB,ALDH6A1,IMPA2,PIP5K1C,PLCB4,PIP4K2A,PLCZ1,PIP5K1B,PIP5K1A,PLCB1	1.66117	0.0123512	0.101511
hsa04727	GABAergic synapse	Nervous system	25	87	1192	6253	KCNJ6,ADCY1,CACNA1C,GNAI1,GNG7,GPHN,GABRB2,GABRA2,ADCY8,CACNA1D,GAD1,GABRA3,GLS2,GABRG3,PRKACB,SRC,GABRB3,GABRG2,GABBR2,ADCY5,CACNA1B,GABRB1,PRKX,CACNA1A,PRKCA	1.50742	0.0161534	0.125958
hsa04514	Cell adhesion molecules (CAMs)	Signaling molecules and interaction	37	141	1192	6253	CLDN16,SDC2,NEGR1,ITGB2,NRXN1,NLGN4X,CLDN14,CD8B,HLA-C,CLDN7,HLA-A,ITGAM,PECAM1,NLGN1,CNTNAP2,HLA-DRB1,HLA-B,ITGA9,NRCAM,CDH4,LRRC4C,ITGA6,ITGB8,NLGN3,CD86,CDH3,HLA-G,PTPRM,NRXN3,CD22,CLDN1,NTNG2,CDH2,ICOSLG,CD34,MAG,PVRL3	1.37656	0.0167524	0.125958
hsa04915	Estrogen signaling pathway	Endocrine system	27	96	1192	6253	PIK3CB,KCNJ6,FKBP5,ADCY1,GNAI1,EGFR,PIK3R1,PRKCD,ADCY8,ITPR2,SHC3,CREB3L2,GNAS,PRKACB,PLCB4,KCNJ3,SRC,GABBR2,ADCY5,KRAS,RAF1,PRKX,HSP90AA1,CREB5,PLCB1,GNAQ,OPRM1	1.47538	0.0167625	0.125958
hsa04721	Synaptic vesicle cycle	Nervous system	19	62	1192	6253	UNC13B,UNC13A,AP2A2,ATP6V1B1,CPLX3,RAB3A,CLTCL1,ATP6V1A,RIMS1,CPLX2,ATP6V0E2,CACNA1B,SNAP25,CLTC,ATP6V0A4,DNM3,CACNA1A,UNC13C,ATP6V1D	1.60759	0.0176564	0.12899
hsa04970	Salivary secretion	Digestive system	24	84	1192	6253	CD38,ATP2B2,ADCY1,CHRM3,CST1,ATP1B2,ADCY8,ITPR2,GNAS,MUC5B,PRKACB,ADRA1D,PLCB4,RYR3,ADCY5,PRKX,ADRB2,PLCB1,PRKG1,GUCY1A2,DMBT1,GNAQ,SLC9A1,PRKCA	1.4988	0.0195712	0.139114
hsa04614	Renin-angiotensin system	Endocrine system	7	16	1192	6253	CMA1,ENPEP,CPA3,ACE,NLN,AGTR2,ANPEP	2.29504	0.0204598	0.141604
hsa04520	Adherens junction	Cell communication	21	72	1192	6253	MET,EGFR,BAIAP2,SMAD3,WASF3,ACTN2,IGF1R,INSR,TCF7L2,WASF1,SNAI1,TCF7L1,SMAD2,FER,SRC,PTPRM,TJP1,CTNNA3,SORBS1,PVRL3,CTNNA2	1.53003	0.0225665	0.148375
hsa04971	Gastric acid secretion	Digestive system	21	72	1192	6253	ADCY1,GNAI1,CHRM3,ATP1B2,ADCY8,ITPR2,ATP4B,KCNJ2,GNAS,EZR,PRKACB,KCNQ1,PLCB4,MYLK,ADCY5,PRKX,KCNK2,PLCB1,GNAQ,SLC9A1,PRKCA	1.53003	0.0225665	0.148375
hsa04961	Endocrine and other factor-regulated calcium reabsorption	Excretory system	15	47	1192	6253	SLC8A1,AP2A2,ATP1B2,VDR,KLK1,GNAS,CLTCL1,PRKACB,PLCB4,PRKX,CLTC,DNM3,PLCB1,GNAQ,PRKCA	1.67419	0.0232713	0.149277
hsa04012	ErbB signaling pathway	Signal transduction	24	86	1192	6253	PIK3CB,MAPK10,STAT5A,NCK2,MAP2K4,PAK7,EGFR,STAT5B,NRG3,CDKN1A,PIK3R1,ERBB4,SHC3,CAMK2G,PLCG2,CRKL,SRC,KRAS,CBLB,RAF1,NRG2,TGFA,NRG1,PRKCA	1.46395	0.0257667	0.157596
hsa04974	Protein digestion and absorption	Digestive system	24	86	1192	6253	COL4A5,SLC8A1,CELA3A,CELA3B,CPA3,SLC7A7,COL24A1,COL11A1,ATP1B2,COL3A1,SLC7A9,COL17A1,COL6A1,COL5A1,PRSS1,KCNE3,KCNQ1,COL5A3,COL4A2,COL4A1,COL22A1,CPB2,COL13A1,COL14A1	1.46395	0.0257667	0.157596
hsa05166	HTLV-I infection	Infectious diseases: Viral	61	262	1192	6253	ANAPC4,PIK3CB,MAPK10,LTBR,STAT5A,IL15RA,MAP2K4,ITGB2,TBPL2,ADCY1,STAT5B,CHEK2,E2F2,CDKN1A,PIK3R1,NFYB,NFKBIA,HLA-C,TGFB2,NFATC1,SMAD3,SLC25A5,ETS2,RRAS2,HLA-A,ADCY8,IL6,ANAPC2,XPO1,NFATC2,HLA-DRB1,HLA-B,JAK1,E2F3,IKBKG,PRKACB,SMAD2,TLN2,WNT11,HLA-G,TERT,POLE4,APC,NRP1,ADCY5,KRAS,PPP3CC,ANAPC7,PRKX,IL15,CCND3,RAN,IL2RA,ETS1,BUB1B,TCF3,JAK3,FZD1,IL2RB,SRF,CSF2	1.22135	0.0268828	0.160686
hsa04066	HIF-1 signaling pathway	Signal transduction	28	105	1192	6253	TEK,ANGPT4,PIK3CB,LTBR,VEGFA,EIF4E,EGFR,NOX3,CDKN1A,PIK3R1,STAT3,IFNGR2,RBX1,CAMK2G,IL6,PLCG2,IGF1R,TLR4,NOX1,INSR,EGLN3,CYBB,PFKFB3,TFRC,ANGPT1,PDHA2,SERPINE1,PRKCA	1.39888	0.0295784	0.172869
hsa04725	Cholinergic synapse	Nervous system	29	111	1192	6253	PIK3CB,ADCY1,CACNA1C,SLC5A7,GNAI1,GNG7,PIK3R1,CHRM3,CHRNA7,ADCY8,ITPR2,CAMK2G,CREB3L2,CACNA1D,KCNJ2,PRKACB,KCNQ1,PLCB4,KCNJ3,CAMK4,ADCY5,KRAS,CACNA1B,PRKX,CREB5,PLCB1,CACNA1A,GNAQ,PRKCA	1.37053	0.0347801	0.198851
hsa04512	ECM-receptor interaction	Signaling molecules and interaction	23	85	1192	6253	COL4A5,LAMA1,COL24A1,COL11A1,LAMA2,CD36,COL3A1,ITGA9,COL6A1,SV2C,COL5A1,RELN,ITGA6,ITGB8,DAG1,COL5A3,COL4A2,COL4A1,VWF,LAMC1,TNC,THBS2,LAMA4	1.41945	0.040062	0.224177
hsa05220	Chronic myeloid leukemia	Cancers: Specific types	20	72	1192	6253	PIK3CB,STAT5A,BCR,STAT5B,MECOM,E2F2,CDKN1A,PIK3R1,NFKBIA,TGFB2,SMAD3,RUNX1,SHC3,CRKL,E2F3,IKBKG,KRAS,CBLB,RAF1,CTBP2	1.45717	0.0419238	0.229708
hsa04530	Tight junction	Cell communication	33	132	1192	6253	CLDN16,MAGI1,EXOC4,GNAI1,CLDN14,PRKCD,CLDN7,RRAS2,MYH3,ACTN2,PRKCE,MYH14,PPP2R2B,PRKCZ,MYL12B,MPP5,SRC,PRKCH,CLDN1,INADL,MYH9,MAGI3,KRAS,VAPA,MYH10,TJP1,CTNNA3,MAGI2,MPDZ,CGN,CTNNA2,CASK,PRKCA	1.31145	0.0443341	0.237956
hsa04640	Hematopoietic cell lineage	Immune system	17	86	1192	6253	CD38,CD8B,CD36,IL6,ITGAM,MS4A1,HLA-DRB1,ITGA6,CD22,CD1D,TFRC,CD34,IL2RA,TPO,ANPEP,FCER2,CSF2	1.03696	0.457381	0.904445
Supplementary Table S4: The selected 21 SNVs for genotyping
dbSNP	Chr	Pos	Ref Base	Alt Base	Pvalue	location of SNPs	Gene Symbol	Frequency in 1K Genome
rs7765815	chr6	43814154	A	T	0.00791169	intergenic	VEGFA(dist=59931),LINC01512(dist=44611)	0.88
rs7831267	chr8	108777178	G	A	0.003276	intergenic	ANGPT1(dist=266924),RSPO2(dist=134366)	---
rs1494906	chr8	108897848	C	T	0.00573567	intergenic	ANGPT1(dist=387594),RSPO2(dist=13696)	0.63
rs1494907	chr8	108897678	T	G	0.00573567	intergenic	ANGPT1(dist=387424),RSPO2(dist=13866)	0.62
rs17400639	chr8	108855331	A	G	0.00791169	intergenic	ANGPT1(dist=345077),RSPO2(dist=56213)	0.63
rs12541795	chr8	108872406	C	T	0.00791169	intergenic	ANGPT1(dist=362152),RSPO2(dist=39138)	0.66
rs1494919	chr8	108863367	C	T	0.00791169	intergenic	ANGPT1(dist=353113),RSPO2(dist=48177)	0.6
rs9693063	chr8	108872753	A	G	0.00791169	intergenic	ANGPT1(dist=362499),RSPO2(dist=38791)	0.66
rs9693073	chr8	108872600	G	A	0.00791169	intergenic	ANGPT1(dist=362346),RSPO2(dist=38944)	0.66
rs12548708	chr8	108857416	G	A	0.00791169	intergenic	ANGPT1(dist=347162),RSPO2(dist=54128)	0.63
rs4735014	chr8	108853012	G	C	0.00791169	intergenic	ANGPT1(dist=342758),RSPO2(dist=58532)	0.63
rs147959156	chr3	195725118	T	A	0.000359967	intergenic	SDHAP1(dist=7968),TFRC(dist=51037)	0.66
rs62283426	chr3	195721254	A	T	0.00334205	intergenic	SDHAP1(dist=4104),TFRC(dist=54901)	0.65
rs138060211	chr3	195725716	C	T	0.00364103	intergenic	SDHAP1(dist=8566),TFRC(dist=50439)	0.57
rs72611179	chr3	195725157	C	T	0.00364103	intergenic	SDHAP1(dist=8007),TFRC(dist=50998)	0.71
rs553127	chr3	195725093	A	C	0.00364103	intergenic	SDHAP1(dist=7943),TFRC(dist=51062)	---
rs149083935	chr3	195725720	G	A	0.00364103	intergenic	SDHAP1(dist=8570),TFRC(dist=50435)	0.57
rs797364	chr14	34548669	G	T	0.000431625	intergenic	EGLN3(dist=128385),SPTSSA(dist=353475)	---
rs1346902	chr14	34556908	G	C	0.00106455	intergenic	EGLN3(dist=136624),SPTSSA(dist=345236)	0.74
rs797316	chr14	34632233	G	A	0.00836173	intergenic	EGLN3(dist=211949),SPTSSA(dist=269911)	0.88
rs521539	chr6	32581973	G	A	0.00364103	intergenic	HLA-DRB1(dist=24360), HLA-DQA1(dist=23210)	0.21
Whole-genome sequencing identifies two susceptibility loci associated with high altitude polycythemia in Tibetans at high altitude
Luobu Gesang, Kang Li, Lamu Gusang, Kui Li, Ciren Dawa, Yangjing Baima, Ruiwei Tian, Ma Ni, Qu Dan, A san, Gawa Gesang
Supplementary Table S5: Characteristics of case and control subjects in genotyping phase
Sample ID	Case ID	SEX	AGE	Case/Contrl	SpO2	height	weight	BMI	waist circumference	hipline	Heart Rate	systolic pressure	diastolic pressure	WBC	RBC	HGB	HCT	MCV	MCH	MCHC	PLT	ALT	AST	AST/ALT	TP	ALB	A/G	GLO	TBIL	DBIL	IBIL	DBIL/TBIL	ALP	GGT	HCY	GLU	UREA	CREA	UA	TCO2	CH	TG	HDL-C	LDL-C	Fe	TIBC	UIBC	TS	IgG
		M/F	year		%	cm	kg	BMI	cm	cm	per min	mmHg	mmHg	109g/L	10gG/L	g/L	%	Fl	Pg	g/L	109g/L	IU/L	IU/L		g/L	g/L		g/L	umol/L	μmol/L	umol/L	%	IU/L	IU/L	umol/L	mmol/L	mmol/L	umol/L	umol/L	mmol/l	mmol/L	mmol/L	mmol/L	mmol/L	umol/L	umol/L	μmol/L	%	g/L
21	9792	M	30	HAPC	84	169	50	17.5	65	83	62	105	80	4.4	6.81	213	612	89.9	31.3	348	85	42	36	0.9	84.3	47.6	1.3	36.7	13.9	8.1	5.8	41.7	133	14	15.6	3.65	4.27	46	456	22	3.3	0.55	1.38	1.89	14	76	62.15	18.4	15.89
34	9725	M	57	HAPC	74	164	56	20.8	69	87	49	173	111	4.7	7.89	237	729	91.4	29.7	325	95	24	35	1.5	78.6	39.8	1.03	38.8	22.3	13.5	8.8	39.5	180	55	20.1	4.77	5.17	86	445	29	4.45	0.73	1.27	2.81	9.5	64	54.83	14.8	17.95
37	9728	M	54	HAPC	87	161	55	21.2	72	84	70	123	83	6	7.7	247	708	91.9	32.1	349	88	42	39	0.9	77	45.4	1.44	31.6	12.3	6.4	5.9	48	160	47	11.7	5.56	4.3	53	410	15	3.51	0.77	1.28	1.76	24.3	51	26.68	47.7	14.99
42	9505	M	50	HAPC	81	159	62	24.5	85	91	87	132	99	4.7	6.3	231	626	99.4	36.7	369	136	77	59	0.8	77.9	50.3	1.82	27.6	22.3	14.6	7.7	34.5	110	125	18.3	2.5	3.83	56	464	24	4.41	1.49	1.4	2.45	52	62	9.5	84.6	10.44
49	9572	M	51	HAPC	77	171	60	20.5	75	91	72	144	105	6.4	6.28	227	632	100.6	36.1	359	84	32	22	0.7	75.2	45.6	1.54	29.6	27.3	17.2	10.1	37	124	56	29.6	5.26	6.32	57	520	22	4.17	0.8	1.41	2.22	15.7	55	39.06	28.7	14.27
77	9533	M	40	HAPC	86	169	60	21	80	89	108	164	123	6.3	6.92	234	647	93.5	33.8	362	126	117	109	0.9	83.7	44.4	1.13	39.3	22.1	14.2	7.9	35.7	131	96	15	4.54	5.51	56	396	19	5.78	0.82	1.6	3.86	31	67	35.92	46.3	17.93
86	9554	F	43	HAPC	84	145.5	46	21.7	64	83	79	135	88	4.2	8.33	215	666	80	25.8	323	59	26	30	1.2	78.3	43.8	1.27	34.5	13.6	8	5.6	41.2	72	11	7.8	4.56	3.35	45	252	20	3.97	0.38	1.66	1.79	4.2	84	79.6	5	15.66
94	9543	M	65	HAPC	83	168	63	22.3	85	92	87	158	118	3.7	7.2	212	628	87.2	29.4	338	119	16	38	2.4	92.7	45.7	0.97	47	11.4	6.6	4.8	42.1	104	33	45.1	4.16	2.22	69	417	13	5.14	1.26	1.2	3.76	10.5	81	70.5	13	21.49
104	9368	F	42	HAPC	81	152.5	45	19.3	60	94	85	99	64	4.9	6.12	192	557	91	31.4	345	152	17	22	1.3	76.6	41.8	1.2	34.8	11.6	5.7	5.9	50.9	53	18	15.4	5.71	2.76	59	269	16	3.4	0.88	1.09	1.9	32.8	53	19.89	62.3	16.31
108	9400	M	34	HAPC	81	169	80	28	94	100	88	115	83	5.4	7.33	246	709	96.7	33.6	347	54	77	55	0.7	72.4	46.1	1.75	26.3	26.1	17.6	8.5	32.6	118	65	11.8	5.33	3.78	66	601	16	4.5	1.36	1.07	3.11	47.5	62	14.51	76.6	11.19
112	621	M	46	HAPC	81	165	50	18.4	69	84.5	72	110	79	4.4	6.12	213	618	101	34.8	345	90	17	28	1.6	78.8	48.8	1.63	30	17.6	9.2	8.4	47.7	114	27	11.8	4.78	2.63	61	269	20	4.12	1.08	1.67	2.17	51.1	61	9.66	84.1	13.05
123	9395	M	39	HAPC	75	170	58	20.1	72	92	86	114	83	4.7	7.02	232	656	93.4	33	354	173	73	82	1.1	75.8	45.1	1.47	30.7	16	8.2	7.8	48.8	98	154	8.4	4.78	2.6	45	616	14	4.46	0.72	1.72	2.39	53.5	59	5.41	90.8	13.17
131	217	M	35	HAPC	76	174	55	18.2	71	84	98	118	81	5.8	6.3	221	648	102.9	35.1	341	87	18	33	1.8	79.5	49.6	1.66	29.9	19.8	9.4	10.4	52.5	68	46	23	4.6	5.72	68	333	22	4.84	1.51	1.43	2.95	48.7	52	3.55	93.2	13.33
134	9399	M	37	HAPC	82	169.5	61	21.2	78	93	79	110	89	5.6	6.45	218	596	92.4	33.8	366	107	46	39	0.8	66.7	42.8	1.79	23.9	8.4	5	3.4	40.5	83	31	15.8	4.71	4.75	59	381	17	4.99	0.69	1.45	3.12	15.4	52	36.19	29.9	10.43
141	9401	M	33	HAPC	87	168	70	24.8	92	90	73	139	101	3.5	6.39	213	613	95.9	33.3	347	108	40	35	0.9	78.2	47.7	1.56	30.5	11.4	6.3	5.1	44.7	110	146	14.2	4.74	4.02	80	555	14	5.09	4.22	1.08	3.01	12.1	74	62.35	16.3	10.25
180	9504	M	74	HAPC	85	170	84	29.1	73	107	70	179	108	4.7	6.14	225	609	99.2	36.6	369	113	22	36	1.6	81.6	46.5	1.32	35.1	37	27.1	9.9	26.8	99	79	31	4	3.72	59	514	18	5.7	1.66	1.8	3.44	40.8	70	28.87	58.6	11.27
190	9601	F	58	HAPC	70	155	60	25	82	105	74	128	100	5.1	6.63	217	612	92.3	32.7	355	116	32	31	1	80.4	45.5	1.3	34.9	11.5	7	4.5	39.1	115	112	17	4.36	6.74	55	404	21	6	1.41	1.46	3.72	21.3	53	31.61	40.3	14.77
205	9069
211	2816	F	39	HAPC	78	148	41.3	18.7	62	81	95	101	75	8.7	5.9	198	585	99.2	33.6	338	119	23	31	1.3	73.1	44.9	1.59	28.2	14.4	5.3	9.1	63.2	79	19	7.8	4.29	4.01	54	320	17	2.6	0.6	1.13	1.28	31.3	50	18.98	62.3	13.74
224	2617	M	47	HAPC	81	171	77	26.3	100	98	72	141	100	6.5	6.26	213	612	97.8	34	348	141	49	39	0.8	80.2	45	1.28	35.2	17	10.1	6.9	40.6	135	52	20.8	4.7	3.78	80	587	17	5.78	1.64	1.01	4.08	45.3	58	12.24	78.7	14.13
279	2409	M	37	HAPC	78	162	51.2	19.4	70	82	84	140	107	6.9	6.29	211	619	98.4	33.5	341	142	36	94	2.6	87.6	50.2	1.43	36	24.9	15.2	8.8	35.7	82	29	39.8	5.74	4.78	58	261	16	4.11	0.41	1.99	2.23	33.1	61	27.78	54.4	11.9
281	9661	M	22	HAPC	86	177	57	18.2	72	84	72	96	72	3.7	6.18	216	606	98.1	35	356	109	15	25	1.7	65.8	44.7	2.12	21.1	16.2	10	6.2	38.3	100	15	28	2.59	5.32	53	374	21	3.37	1.33	1.19	1.73	39.1	54	15.29	71.9	8.99
307	2844	F	54	HAPC	75	137.5	34.4	17.9	54	77	74	110	75	6.4	6.31	190	581	92.1	30.1	327	88	19	32	1.7	76.7	46.8	1.57	29.9	9.3	5.5	3.8	40.9	95	27	10.7	5.17	4.63	70	280	19	5.79	1.05	1.6	3.73	7.8	44	36.49	17.6	12.93
345	9627	M	55	HAPC	78	171	64	21.9	81	93	62	161	109	6.6	6.19	216	597	96.4	34.9	362	160	35	39	1.1	77.8	41.7	1.16	36.1	15.8	9.4	6.4	40.5	88	133	8.8	5.52	1.86	54	588	27	6.06	1.52	1.86	4.4	51.8	61	9.21	84.9	14.62
347	2367	M	39	HAPC	84	162.5	66	24.8	92	90	99	170	135	5.3	6.93	223	672	97	32.2	332	78	41	73	1.8	86.5	49.5	1.34	37	25.7	16.3	9.4	36.6	44	44	53.5	4.85	3.65	59	388	15	3.67	1.14	1.34	2.16	26.4	74	47.97	35.5	12.12
398	9438	M	52	HAPC	80	156	44	18.1	68	82	75	139	89	6.1	6.82	222	640	93.8	32.6	347	152	19	29	1.5	75.2	45.8	1.56	29.4	16	11.6	4.4	27.5	75	15	34.1	4.77	2.53	44	357	15	4.41	0.54	1.69	2.41	38	89	51.16	42.6	11.69
412	9693	M	54	HAPC	78	172	77	26	94	98	79	118	75	6.6	6.89	220	636	92.3	31.9	346	95	38	29	0.8	81.2	44.4	1.21	36.8	13.2	8.5	4.7	35.6	89	64	51.4	4.13	3.9	71	400	17	5.99	1.64	1.44	3.97	13.4	50	37.09	26.5	16.72
446	9456	M	59	HAPC	80	167	73	26.2	96	104	78	129	89	4.8	6.91	234	667	96.5	33.9	351	72	25	37	1.5	73.4	39.7	1.18	33.7	20.4	13.1	7.3	35.8	62	32	20.8	4.75	4.89	80	615	15	4.95	1.17	1.16	3.47	40.6	56	15.47	72.4	16.24
461	9428	M	41	HAPC	82	176	80	25.8	99	100	68	151	102	5.9	6.24	214	621	99.5	34.3	345	114	48	33	0.7	80.4	45.8	1.32	34.6	13.6	8.2	5.4	39.7	65	153	14.2	5.09	3.87	95	397	21	5.14	1.17	1.36	3.33	24	60	35.94	40	13.43
478	9642	M	38	HAPC	85	176	70	22.6	84	93	95	157	120	4.7	6.61	214	627	94.9	32.4	341	87	33	26	0.8	80.1	50.5	1.71	29.6	20	12.7	7.3	36.5	124	50	11.1	5.03	3.83	49	398	20	5.71	0.97	1.4	3.62	23.6	52	28.55	45.3	13.62
485	9646	F	55	HAPC	81	152	43	18.6	60	85	114	170	116	7.4	6.22	204	585	94.1	32.8	349	153	44	49	1.1	76.8	46.9	1.57	29.9	12.5	7.3	5.2	41.6	110	17	10	6.55	4.47	62	318	24	5.42	1.2	1.82	3.38	27.2	63	35.83	43.2	15.21
534	2759	M	53	HAPC	85	166	68.5	25	93	91	2	119	87	6.8	6.67	213	612	91.8	31.9	348	104	33	37	1.1	82.9	48.1	1.38	34.8	15	10.8	4.2	28	114	41	19.3	4.87	5.23	59	363	22	6.43	1.79	1.46	4.33	36.6	76	39.15	48.3	14.19
585	9086	M	55	HAPC	82	161	58	22.4	88	97	55	166	117	6.3	7.77	238	727	93.6	30.6	327	115	51	61	1.2	74.5	40.4	1.18	34.1	15.7	11.1	4.6	29.3	232	187	25.5	4.48	6.51	106	558	17	9.15	1.75	1.72	6.85	17.9	67	48.86	26.8	13.45
589	9074	F	44	HAPC	82	152.5	50	21.5	65	91	84	160	91	4.6	6.49	196	578	89.1	30.2	339	142	14	27	1.9	82.4	47.6	1.37	34.8	11.5	6.7	4.8	41.7	80	10	3.2	4.86	2.75	56	250	16	3.97	1.02	1.41	1.95	22.5	79	56.07	28.6	17.36
591	9077	M	42	HAPC	76	156	50	20.5	67	88	53	110	86	4.3	6.83	222	639	93.6	32.5	347	141	29	27	0.9	75.8	47	1.63	28.8	13.4	8.1	5.3	39.6	139	25	7.2	5.42	4.86	59	461	19	5.86	0.85	1.61	3.66	49.6	54	4.4	91.9	14.47
592	9075	M	34	HAPC	78	159.5	49	19.3	68	83	118	139	93	10.1	6.56	221	636	97	33.7	347	163	70	94	1.3	76.6	45	1.42	31.6	8.4	4.9	3.5	41.7	152	159	26.9	6.24	3.32	71	449	16	4.97	1.03	2.11	2.28	14	75	61.08	18.6	14.73
598	9089	F	28	HAPC	76	135	30	16.5	54	75	52	85	59	9.1	7.45	213	643	86.3	28.6	331	135	16	29	1.8	74.4	43.5	1.41	30.9	26.3	17.8	8.5	32.3	149	32	9.8	4.22	5.46	70	351	18	4.02	0.6	1.65	1.71	11.6	82	69.97	14.2	16.27
610	9122	M	46	HAPC	80	163	56	21.1	73	90	71	109	79	4.8	6.97	229	640	91.8	32.9	358	131	25	31	1.2	76.8	44.6	1.39	32.2	14.3	10.3	4	28	139	15	18.4	4.25	3.87	59	416	19	5.3	1.45	1.33	3.3	41.3	68	26.38	61	15.42
613	9129	M	30	HAPC	81	156	48	19.7	66	89	72	98	68	7.2	6.83	231	638	93.4	33.8	362	168	15	27	1.8	80	48.3	1.52	31.7	17.5	10.8	6.7	38.3	98	13	20.4	4.57	7.81	72	472	18	4.4	0.52	1.26	2.94	21	56	35.03	37.5	15.21
614	9130	F	28	HAPC	78	150	46	20.4	66	88	91	84	55	6.4	6.13	202	592	96.6	33	341	119	10	17	1.7	69.1	39.3	1.32	29.8	8.8	5.4	3.4	38.6	68	13	5.1	5.27	9.49	65	364	20	4.08	0.56	1.56	1.97	10.5	17	6.87	60.4	12.98
616	9099	M	27	HAPC	78	166	54	19.6	73	88	82	88	61	4.5	8.03	211	746	92.9	26.3	283	94	20	24	1.2	78.4	41.9	1.15	36.5	27	18.5	8.5	31.5	109	49	33.4	4.55	4.59	70	566	16	4.93	0.57	1.61	2.85	31.2	58	27.17	53.5	19.02
617	9087	M	27	HAPC	77	137	33	17.6	59	77	60	96	69	7.5	7.04	222	652	92.6	31.5	340	145	39	45	1.2	69.2	42.5	1.59	26.7	19	10.2	8.8	46.3	183	62	9.6	4.87	6.29	85	392	18	3.13	0.41	1.49	1.12	18.2	52	34.28	34.7	14.88
619	9112	F	31	HAPC	76	147	42	19.4	66	90	73	88	67	13.3	6.51	226	620	95.2	34.7	365	152	35	30	0.9	78.6	44.3	1.29	34.3	12.1	6.9	5.2	43	90	32	10.1	3.9	4.61	64	391	19	3.21	0.83	1.07	1.74	33.7	66	32.35	51	19.78
621	9093	F	49	HAPC	88	143	39	19.1	64	81	66	93	73	5	6.36	193	557	87.6	30.3	346	141	5	17	3.4	69.1	42	1.55	27.1	10.1	5	5.1	50.5	103	32	18.6	4.22	4.68	60	391	13	3.76	0.82	1.03	2.43	22	49	26.59	45.3	13.68
622	9120	M	45	HAPC	81	162	62	23.6	85	92	72	101	76	6.3	7.35	231	672	91.4	31.4	344	143	114	89	0.8	78.3	46.2	1.44	32.1	16.3	11.2	5.1	31.3	94	42	15.2	4.53	3.27	80	515	17	6.29	1.06	1.71	4.25	39.2	67	27.4	58.9	14.9
637	9118	F	56	HAPC	77	149	45	20.3	64	87	64	135	87	7.5	6.34	197	557	87.9	31.1	354	219	33	27	0.8	78.8	47.9	1.55	30.9	7.8	4.5	3.3	42.3	131	61	11.1	4.35	5.8	82	258	17	3.94	0.77	1.45	1.99	15.6	49	33.5	31.8	15.77
645	9209	M	62	HAPC	94	171	65	22.2	91	96	92	178	129	4.7	6.62	214	610	92.1	32.3	351	112	33	32	1	68.5	32.4	0.9	36.1	10.2	5.8	4.4	43.1	93	69	20.5	7.69	8.23	98	458	17	4.68	1.33	1.25	2.81	20.6	64	43.45	32.2	15.54
646	9218	M	39	HAPC	85	160.5	51	19.8	69	86	65	97	72	7	6.52	224	611	93.7	34.4	367	182	37	36	1	81.9	46.7	1.33	35.2	14.6	9.1	5.5	37.7	134	51	16.2	3.99	5.59	66	440	16	6.1	1.46	1.5	4.28	19.1	68	49.19	28	15.21
651	9241	M	31	HAPC	82	159.5	44	17.3	65	82	73	91	57	8	7.09	238	676	95.3	33.6	352	157	15	23	1.5	71.9	42.9	1.48	29	19.8	11.9	7.9	39.9	98	12	10.1	5.35	5.75	47	374	20	3.36	0.58	1.32	1.61	34.1	50	16.32	67.6	12.98
653	9236	M	47	HAPC	75	165.5	63	23	87	91	79	141	96	5.9	6.47	231	648	100.2	35.7	356	168	9	30	3.3	98.3	45.2	1.47	28.98	19.2	11.1	8.1	42.2	88	65	11.4	5.66	2.94	57	695	16	6.16	1.08	1.74	4.19	42.6	66	23.73	64.2	16.34
664	9259	M	44	HAPC	81	168	88	31.2	113	105	83	136	83	8	6.97	240	666	95.6	34.4	360	163	65	41	0.6	77	44.3	1.35	32.7	13.9	8.4	5.5	39.6	98	148	10.6	4.98	4.12	63	597	18	5.13	1.4	1.33	3.3	18.4	60	42	30.5	11.75
667	9247	F	49	HAPC	79	153.5	55	23.3	82	93	63	188	119	4.4	6.71	226	637	94.9	33.7	355	126	20	24	1.2	82.3	41.8	1.03	40.5	12.4	7.9	4.5	36.3	106	34	8.7	4.81	2.96	41	301	20	4.24	1.02	1.29	2.49	22.3	69	46.67	32.3	19.39
675	9283	M	44	HAPC	81	156	50	20.5	72	88	79	111	65	8.5	5.98	210	563	94.1	35.1	373	178	21	19	0.9	72.6	42.9	1.44	29.7	7.7	3.6	4.1	53.2	77	26	8.5	4.89	2.16	44	292	15	3.59	0.88	0.98	2.19	12.3	50	38.1	24.4	15.3
679	9256	M	43	HAPC	78	171	50	17.1	67	88	74	97	68	7.3	6.83	228	639	93.6	33.4	357	131	16	24	1.5	81.7	47.7	1.4	34	13.8	8.9	4.9	35.5	141	23	8.5	5.02	2.65	36	299	18	4.64	1.24	1.05	3.17	31.7	62	30.15	51.3	15.42
680	9207	M	27	HAPC	78	171	62	21.2	80	92	104	135	88	4.9	7.09	248	692	97.6	35	358	86	91	30	1	80	42	1.23	37.3	64	9.7	21.6	42.5	106	12	10	4.6	7.18	58	480	18	4.63	0.85	1.77	2.12	16.1	53	42.4	31.1	17.71
681	9272	M	31	HAPC	78	159	45	17.8	69	83	77	109	65	6	8.89	235	757	85.2	26.4	310	138	20	26	1.3	77.6	47.6	1.59	30	16.5	9.7	6.8	41.2	119	21	8.7	5.26	4.07	61	516	12	3.78	1.22	0.85	2.56	7.8	69	61.19	11.3	12
686	9270	M	51	HAPC	75	154.5	43	18	68	84	62	97	63	5	7.77	232	729	93.8	29.9	318	70	38	37	1	64.2	37.3	1.39	26.9	22.9	12.9	10	43.7	104	76	13.4	4.07	5.21	61	392	17	4.03	0.69	1.43	1.96	24.6	55	29.92	45.1	12.58
690	9286	F	29	HAPC	69	152	50	21.6	70	32	98	98	60	8.2	7.31	199	602	82.4	27.2	331	252	36	34	0.9	65.5	37.8	1.36	27.7	8.8	4.1	4.7	53.4	65	10	12.4	3.64	4.42	45	320	16	3.91	1.05	1.1	2.27	5	71	65.89	7.1	13.48
696	9243	M	26	HAPC	97	173	51	17	70	89	74	80	59	6.3	6.69	234	649	97	35	361	166	20	23	1.1	75.4	46.1	1.57	29.3	23.3	14.7	8.6	36.9	140	74	13.1	4.45	5.45	54	554	16	3.58	0.71	1.2	2.02	53	64	11.22	82.5	11.52
701	9275	M	42	HAPC	90	165	62	22.8	85	92	75	92	66	4.5	7.04	239	698	99.1	33.9	342	101	21	26	1.2	65.3	40.6	1.64	24.7	13.9	8.2	5.7	41	81	42	20.1	3.89	4.26	67	409	19	5.53	0.8	1.25	4.06	26.9	57	30.3	47	12.62
708	9274	F	42	HAPC	76	153	54	23.1	74	93	56	112	78	6.7	6.47	204	583	90.1	31.5	350	159	13	20	1.5	69	43.1	1.66	25.9	22.4	12.5	9.9	44.2	63	17	12.2	4.03	10.26	69	477	17	3.92	0.74	1.19	2.23	25.3	59	33.72	42.9	13.41
710	2861	F	33	HAPC	72	152	44.6	19.5	68	84	72	120	70	5.7	6.41	194	605	94.4	30.3	321	23	62	96	1.5	74.8	42.5	1.32	32.3	15.3	9.6	5.7	37.3	105	25	7.5	3.96	4.5	43	332	18	4.71	0.68	1.77	2.9	21.5	60	38.91	35.6	13.37
711	9225	M	48	HAPC	77	171	60	20.5	83	89	65	122	82	4.4	7.17	249	690	96.2	34.7	361	99	40	38	1	77	46.6	1.53	30.4	24.9	17.1	7.8	31.3	84	78	16.9	4.08	5.56	64	407	16	5.14	3.64	1.63	2.93	56.6	68	11.31	83.3	12.87
712	9224	F	35	HAPC	83	153	50	21.4	74	92	55	100	67	6.4	5.64	190	535	94.9	33.7	355	202	20	27	1.4	83.7	46.5	1.25	37.2	11	5.4	5.6	50.9	129	24	10.2	4.53	3.74	46	386	18	3.94	1.9	1.19	2.44	16.8	49	32.11	34.3	16.81
726	9193	M	41	HAPC	80	157	42	17	63	85	65	93	57	6.1	6.3	215	608	96.5	34.1	354	105	20	25	1.3	74.6	43.1	1.37	31.5	10.8	6.4	4.4	40.7	108	16	12.2	4.53	5.48	66	391	16	4.62	0.58	1.63	2.52	15.1	49	33.53	31.1	15.03
731	9200	M	31	HAPC	81	163	47	17.7	66	88	99	95	75	7.8	6.88	217	613	89.1	31.5	354	154	21	19	0.9	62.7	40.8	1.86	21.9	11.8	6.7	5.1	43.2	137	21	10.1	4.18	8.08	64	402	16	3.49	0.67	1.37	1.61	14.6	50	35.07	29.4	10.17
732	9190	F	40	HAPC	80	151	44	19.3	64	87	74	94	75	5.9	5.65	194	547	96.8	34.3	355	183	12	28	2.3	76.3	41.8	1.21	34.5	11.1	6.1	5	45	95	17	10	4.96	4.05	76	372	18	3.82	0.64	1.46	1.65	19	61	42.05	31.1	15.73
736	9157	F	42	HAPC	76	152	53	22.9	69	94	81	154	92	6.9	7.08	198	598	84.5	28	331	147	9	21	2.3	86.9	45.8	1.11	41.1	13.8	6.9	6.9	50	82	9	9.1	4.7	4.13	45	269	16	3.41	0.59	1.33	1.56	15.9	72	56.39	22	19.31
737	9184	M	44	HAPC	72	165	50	18.4	70	88	91	102	76	8.8	6.12	212	603	98.5	34.6	352	209	18	31	1.7	81.2	43.5	1.15	37.7	20	12.4	7.6	38	105	21	16.2	5.59	4.06	42	417	17	4.66	1.16	1.12	3.28	20.8	62	40.96	33.7	17.15
746	9198	M	51	HAPC	79	172	65	22	83	98	85	107	95	5.7	6.4	217	616	96.3	33.9	352	123	24	28	1.2	83.3	46	1.23	37.3	16.4	9.7	6.7	40.9	111	25	15	4.22	4.32	80	467	18	4.63	0.85	1.77	2.12	16.1	53	36.95	30.3	17.71
750	9174	F	29	HAPC	79	141	38	19.1	65	84	93	96	72	6.2	6.77	213	610	90.1	31.5	349	122	23	26	1.1	80.4	46.2	1.35	34.2	10	5.3	4.7	47	65	26	11.2	4.59	6.95	51	357	17	4.23	0.64	1.44	2.32	17.5	60	42.14	29.3	16.27
753	9206	F	33	HAPC	80	151	51	22.4	78	93	100	118	80	8.5	6.2	204	579	93.4	32.9	352	80	25	25	1	75.2	41.9	1.26	33.3	17.8	10.5	7.3	41	113	11	11.6	4.47	4.32	49	231	17	4.34	0.61	1.4	2.45	5	56	51.11	8.9	13.15
754	9199	F	36	HAPC	76	160	51	19.9	65	95	91	104	71	7.2	5.67	190	539	95.1	33.5	353	147	17	26	1.5	73.3	41.9	1.33	31.4	12.6	7	5.6	44.4	78	11	9.5	3.86	4.53	53	276	18	3.53	0.59	1.3	1.68	32.5	68	35.05	48.1	15.14
761	9185	M	49	HAPC	79	161	63	24.3	90	98	85	111	90	5.6	7.32	233	693	93.3	31.8	341	95	24	22	0.9	76.7	46.6	1.55	30.1	19	11.8	7.2	37.9	105	69	14.2	4.5	4.79	69	506	15	4.99	2.09	1.27	3.1	27	52	24.7	52.2	12.11
762	9134	F	54	HAPC	77	151	52	22.8	71	92	62	137	79	4.5	6.45	204	588	91.2	31.6	347	185	33	24	0.7	85.3	50.2	1.43	35.1	9.2	4.8	4.4	47.8	128	28	14.2	4.98	6.73	68	341	23	4.74	1.12	1.19	3.06	14.8	60	45.03	24.7	14.59
763	9172	M	38	HAPC	79	159	50	19.8	71	86	76	102	91	7.1	6.39	217	612	95.8	34	355	111	18	25	1.4	76.7	44.3	1.37	32.4	18.6	11.8	6.8	36.6	77	17	12.6	4.88	4.24	45	280	16	3.91	1.12	1.29	2.15	7.6	53	45.83	14.2	13.89
764	9169	F	20	HAPC	79	148.5	40	18.1	69	87	98	93	61	5.2	5.63	193	545	96.8	34.3	354	146	51	43	0.8	77.6	46.6	1.5	31	10.3	7.6	2.7	26.2	154	9	10.7	4.06	6.28	41	283	18	6.08	0.98	1.77	3.67	28.7	80	51.51	35.8	10.88
768	9168	F	40	HAPC	79	143	37	18.1	62	81	70	103	76	6.3	6.58	219	632	96	33.3	347	136	18	27	1.5	80.5	48.3	1.5	32.2	15.5	8.6	6.9	44.5	79	23	14	4.36	6.79	67	329	17	4.36	0.55	1.69	2.02	27.3	54	26.3	50.9	14.58
769	9149	M	36	HAPC	84	160	60	23.4	82	92	64	113	70	7.9	6.89	237	671	97.4	34.4	353	118	18	35	1.9	81.4	45.5	1.27	35.9	10.3	6.5	3.8	36.9	85	41	14.3	3.91	5	63	395	17	5.15	1.05	1.3	3.46	7.5	62	54.31	12.1	15.14
772	9138	M	53	HAPC	82	158.5	44	17.5	67	87	63	109	79	5.3	6.56	222	631	96.2	33.8	352	114	13	19	1.5	76.4	42.8	1.27	33.6	30	20.2	9.8	32.7	94	16	13.4	5.01	2.37	50	312	26	4.39	1.16	1.36	2.31	20.5	46	25.94	44.1	12.7
778	9139	F	23	HAPC	82	153	54	23.1	80	93	74	94	71	7.6	5.99	190	543	90.7	31.7	350	174	15	18	1.2	75	42.8	1.33	32.2	10.6	6.3	4.3	40.6	96	11	9	4.48	3.77	43	346	21	3.6	1.06	1.16	1.94	16.6	63	46.49	26.3	13.88
780	9158	F	42	HAPC	81	143	38	18.6	64	82	58	91	49	5.6	5.95	201	553	92.9	33.8	363	208	15	34	2.3	75.4	44.4	1.43	31	12.4	7.7	4.7	37.9	67	7	8.8	4.84	5.51	43	231	14	4.73	1.02	1.38	2.73	18.4	49	30.49	37.6	15.41
783	9137	M	24	HAPC	79	171	47	16.1	67	86	69	92	51	5.4	6.58	212	603	91.6	32.2	352	152	17	26	1.5	79.3	46.7	1.43	32.6	19.2	13	6.2	32.3	190	14	10.4	3.92	6.51	67	286	22	3.72	1.08	1.23	1.94	19.4	55	35.77	35.2	14.58
788	9180	M	39	HAPC	84	162	53	20.2	71	93	89	114	95	6.4	6.49	212	587	90.4	32.7	361	138	29	35	1.2	84.5	49.9	1.44	34.6	10.8	6	4.8	44.4	110	154	12.5	4.69	4.73	48	520	15	4.22	1.69	1.72	1.82	42.9	60	17.33	71.2	12.97
793	9046	F	30	HAPC	79	156	48	19.7	64	88	73	108	77	6	6.86	195	596	86.9	28.4	327	171	20	27	1.4	93.7	41.4	0.79	52.3	11.8	6.4	5.4	45.8	128	20	12.1	4.47	4.42	42	385	14	3.57	0.63	1.44	1.6	19.7	83	63.25	23.7	23.18
796	9053	F	30	HAPC	80	150	49	21.8	67	88	80	109	74	9.1	5.97	201	567	95	33.7	354	215	28	29	1	80.5	45.9	1.33	34.6	17.7	10.2	7.5	42.4	65	12	9.1	4.97	4.85	66	436	13	2.89	0.46	1.03	1.65	19	63	43.97	30.2	17.76
797	9061	M	51	HAPC	73	159.5	51	20	69	90	94	92	61	5.3	7.04	218	677	96.2	31	322	105	24	32	1.3	77.7	41.4	1.14	36.3	22.6	15.6	7	31	180	118	18.5	3.62	3.19	75	380	16	3.78	0.99	1.12	2.52	9.9	72	62.54	13.7	16.27
798	9051	M	24	HAPC	74	154.5	46	19.3	68	83	89	100	70	8.7	7.16	239	681	95.1	33.4	351	120	18	27	1.5	81.7	47.9	1.42	33.8	36.6	21.3	15.3	41.8	152	22	16	3.91	5.67	80	590	14	3.51	0.49	1.26	1.87	18.4	60	41.14	30.9	16.9
804	9024	M	71	HAPC	78	157	47	19.1	67	80	62	145	106	5.1	7.01	210	633	90.3	30	332	138	11	19	1.7	83.7	43.6	1.09	40.1	18.8	11.3	7.5	39.9	104	17	28.4	4.38	6.06	100	454	19	4.94	0.75	1.28	3.3	12.7	42	28.93	30.5	22.26
807	2221	M	27	HAPC	74	156.5	70.8	28.8	90	94	116	120	88	5.6	7.21	219	660	91.5	30.4	332	79	78	55	0.7	73.5	46.9	1.76	26.6	12.6	6.9	5.7	45.2	57	53	62.8	3.6	3.35	63	357	21	4.08	1.16	1.02	2.72	12.8	50	37.62	25.4	10.2
809	9039	F	32	HAPC	78	154.2	52.5	22.1	76	93	63	111	74	5.1	5.95	191	558	93.8	32.1	342	146	23	29	1.3	82.9	46.4	1.27	36.5	10.4	7.3	3.1	29.8	96	56	12.3	4.26	4.19	72	278	19	5.22	0.98	1.62	2.92	25.2	70	44.47	36.2	15.14
814	9041	M	38	HAPC	82	151.5	45	19.6	71	82	70	98	74	6.3	6.91	224	666	96.4	32.4	336	161	27	28	1	75.1	46.9	1.66	28.2	6.3	3.3	3	47.6	80	44	17.7	5.03	3.54	64	447	17	5.56	1.11	1.19	4.1	17	54	36.63	31.7	12.96
815	9069	M	45	HAPC	80	167	60.5	21.7	81	90	75	168	121	6.1	6.99	240	682	97.6	34.3	352	107	10	19	1.9	66.9	37.2	1.25	29.7	12.6	8	4.6	36.5	104	61	14.8	6.12	4.77	72	556	16	4.47	2.79	1.58	2.24	32.9	53	20.02	62.2	13.62
824	9026	M	33	HAPC	82	153.5	44	18.7	66	80	72	112	83	5.4	6.72	212	605	90	31.5	350	169	12	26	2.2	83.6	48.5	1.38	35.1	17.5	11.6	5.9	33.7	189	22	18.2	3.93	4.23	84	439	17	4.09	0.75	1.29	2.46	28.9	63	33.84	46.1	15.51
829	9049	F	43	HAPC	77	148	70	32	86	104	60	143	98	5.9	6.78	216	630	92.9	31.9	343	215	20	18	0.9	86.6	50.6	1.41	36	9.3	5	4.3	46.2	98	28	16.5	4.22	5.71	68	368	18	4.37	1.02	1.22	2.66	32.4	70	37.55	46.3	14.8
838	9021	F	47	HAPC	82	147.5	55.5	25.5	82	99	73	184	115	5.3	6.05	191	559	92.4	31.6	342	130	29	28	1	69.6	42.8	1.6	26.8	9	5.4	3.6	40	93	20	12.8	4.22	2.68	69	244	15	4.75	1.98	1.45	2.84	16.4	56	39.33	29.4	15.15
862	9364	M	34	HAPC	78	171.5	50	17	67	87	88	100	60	6.8	6.61	215	603	91.2	32.5	357	163	19	24	1.9	77	44.5	1.7	29.1	8	8.9	4.3	35.5	116	28	16	5.32	5.21	73	460	18	3.92	0.72	1.16	2.48	13.7	73	59.74	18.7	11.43
863	9383	M	55	HAPC	65	167	68	24.4	86	93	78	121	465	6.4	7.95	235	673	84.7	29.6	349	160	29	32	1.1	92.7	48.8	1.11	43.9	8.3	4.4	3.9	47	161	45	18.3	4.61	6.18	68	577	8	5.34	0.98	1.41	3.53	15.1	67	51.62	22.6	15.24
864	9369	M	57	HAPC	79	162	60	22.9	81	94	71	141	92	4.9	6.63	219	613	92.5	33	357	96	6	45	7.5	79.1	43.6	1.23	35.5	37.2	26	11.2	30.1	78	88	18.6	4.5	4.33	54	460	14	5.87	1.09	1.79	3.68	47.5	52	4.61	91.2	12.6
867	9342	F	39	HAPC	83	152	53	22.9	70	90	74	105	69	7.5	5.83	197	549	94.2	33.8	359	125	15	21	1.4	86.5	49.9	1.36	36.6	21.4	13.2	8.2	38.3	73	10	12.7	4.91	8.27	54	375	12	5.03	0.57	1.84	2.72	31.8	61	29.45	51.9	16.21
869	9385	F	48	HAPC	76	150.5	56	24.7	70	97	80	97	66	3.2	5.79	198	561	96.9	34.2	353	119	19	22	1.2	74.4	42.5	1.33	31.9	13.8	7.2	6.6	47.8	53	12	11.7	4.59	5.41	51	230	17	4.25	0.71	1.29	2.6	44.8	60	15.19	74.7	14.1
870	9292	F	47	HAPC	73	141	37	18.6	58	83	78	149	70	4.5	5.49	191	550	100.2	34.8	347	167	31	29	0.9	74.7	45.3	1.54	29.4	14.7	8.8	5.9	40.1	87	30	9.4	4.28	3.82	41	242	21	4.67	0.61	1.61	2.51	22.9	61	37.93	37.6	12.49
872	9669	M	49	HAPC	82	166	58	21	74	89	95	118	88	6	6.08	219	597	98.2	36	367	113	26	40	1.5	73.8	45.4	1.6	28.4	17.8	10.3	7.5	42.1	89	69	17	4.64	2.7	45	443	21	5.41	0.65	2.26	2.26	24.7	55	29.93	45.2	11.97
878	9349	F	31	HAPC	80	145.5	47	22.2	71	87	79	103	74	5.9	5.69	196	556	97.7	34.4	353	143	19	23	1.2	75.1	46.8	1.65	28.3	12	6.1	5.9	49.2	122	17	14.8	4.29	5.84	52	303	11	3.73	0.47	0.99	2.63	43	86	43.23	49.9	11.79
882	9388	F	47	HAPC		162	57	21.7	74	100		110	75	4.4	6.91	228	666	96.4	33	342	91	15	24	1.6	75.5	45.3	1.5	30.2	21.5	13.3	8.2	38.1	61	16	9.7	5.03	5.91	57	342	23	4.1	0.68	1.69	1.8	23.8	69	45.63	34.3	13.55
886	9371	M	45	HAPC	79	169	65	22.8	77	91	88	135	92	6.7	6.27	213	592	94.4	34	360	152	8	31	3.9	76.5	45.9	1.5	30.6	23.5	14.6	8.9	37.9	79	44	12.1	4.51	3.38	54	390	14	5.09	1.2	1.86	2.65	55.3	64	9.03	86	12.45
892	9311	M	66	HAPC	83	156	47	19.3	67	90	73	143	90	5.7	6.02	211	597	99.2	35	353	157	15	24	1.6	82.8	43.1	1.09	39.7	14.9	8	6.9	46.3	97	26	14.2	4.18	4.25	52	283	21	2.83	0.46	1.02	1.43	14.5	56	41	26.1	16.81
893	9360	F	46	HAPC	74	150	43	19.1	64	87	63	108	68	5.7	5.82	192	532	91.4	33	361	136	21	26	1.5	77.5	43.1	1.39	31.7	11.9	6.4	4.4	49.6	81	10	14.7	4.95	6.06	74	348	19	6.95	1.03	2.1	3.67	19	57	37.82	33.4	14.29
894	9343	M	41	HAPC	76	151.5	50	21.8	76	89	65	116	78	6.7	6.67	218	613	91.9	32.7	356	171	30	25	0.8	80.3	46.3	1.36	34	14.6	8.6	6	41.1	85	20	44.3	4.13	6.17	56	372	22	3.53	0.73	1.3	1.64	12.8	64	50.71	20.2	14.44
895	9300	F	46	HAPC	80	152	43	18.6	61	82	77	121	72	3.7	6.26	222	632	101	35.5	351	100	52	54	1	79.5	45.4	1.33	34.1	10.4	5.7	4.7	45.2	84	17	12.6	4.39	4.39	63	262	24	3.58	0.6	1.23	1.83	25.9	67	41.36	38.5	15.23
901	9358	F	33	HAPC	79	147	39	18	63	80	64	106	61	8.9	6.19	196	554	89.5	31.7	351	81	17	26	1.3	75.8	44.1	1.87	24.8	12.7	16.8	6.3	47.7	89	12	12.9	3.96	4.48	45	249	20	3.81	0.49	1.34	2.12	9.9	49	39.47	20.1	11.35
905	9334	M	51	HAPC	81	160.5	56	21.7	74	89	108	139	88	5.7	6.66	219	625	93.8	32.9	350	181	39	42	1.1	88.5	48.8	1.23	39.7	13	6.8	6.2	47.7	100	27	19.9	5.74	4.92	69	471	15	4.71	1.01	1.8	2.36	18.6	75	56.69	24.7	16.08
908	9323	M	28	HAPC	78	161	49	18.9	66	86	74	102	60	5.8	6.48	218	598	92.3	33.6	365	111	2	16	8	59.2	38.4	1.85	20.8	9.4	5.1	4.3	45.7	84	26	13.1	3.5	3.42	50	440	19	3.75	0.7	0.85	2.6	24.7	39	14.02	63.8	10.96
909	9337	M	27	HAPC	83	159.5	46	18.1	67	85	78	101	65	6.7	6.22	212	574	92.3	34.1	369	145	14	26	1.9	77.3	44.6	1.36	32.7	8.3	3.3	5	60.2	139	14	13.1	4.45	5.64	59	343	17	2.33	0.32	1.02	0.97	11.1	54	42.91	20.6	14.28
914	9332	M	28	HAPC	76	173	55	18.4	75	87	83	88	70	7.3	6.47	218	601	92.9	33.7	363	113	25	26	1	77.8	45.9	1.44	31.9	10.1	5.1	5	49.5	111	18	9.6	4.85	3.75	47	471	19	2.64	1.52	1.09	1.2	9.9	68	57.65	14.7	13.45
915	9352	F	28	HAPC	76	148	39	17.8	59	86	74	101	69	5	6.56	206	603	91.9	31.4	342	103	51	49	2.1	80.2	47.7	1.47	30.8	18.6	5.3	8	43	87	11	9.6	4.16	3.6	58	355	17	3.96	3.4	1.37	2.19	8.7	75	66.72	11.5	12.48
917	9316	F	46	HAPC	81	150.5	52	23	73	92	62	108	71	6.3	6.27	196	570	90.9	31.3	344	258	19	22	1.2	77.9	47.5	1.56	30.4	13.4	8	5.4	40.3	68	18	20	4.51	4.53	60	324	13	5.02	0.6	1.43	3.12	20.3	57	36.29	35.9	12.77
918	9295	F	51	HAPC	84	151	56	24.6	72	100	60	148	89	3.7	6.14	200	566	92.2	32.6	353	138	23	27	1.2	77.3	42.4	1.21	34.9	10.7	6.4	4.3	40.2	91	20	10.4	4.71	3.24	50	261	18	4.71	0.77	1.42	2.66	35.8	59	23.54	60.3	17.38
930	9294	M	48	HAPC	81	160	44	17.2	67	88	87	120	52	7.7	7.43	247	688	92.6	34.6	374	136	18	19	1.1	77.9	48.9	1.69	29	21.8	13.4	8.4	38.5	117	28	12.3	4.6	4.01	49	308	21	4.2	0.67	1.16	2.72	27.4	55	27.13	50.2	11.36
935	9320	M	41	HAPC	85	154	50	21.1	76	86	75	111	78	7.9	6.6	215	589	89.2	32.6	365	184	24	29	1.2	70.8	45.2	1.77	25.6	7.3	3.9	3.4	46.6	125	45	23.3	4.59	4	67	357	15	4.81	1.22	0.96	3.75	10	55	44.51	18.3	9.65
937	9350	M	27	HAPC	79	163	49	18.4	69	86	89	99	69	6.8	6.54	216	601	91.9	33	359	124	18	31	1.7	70.8	42.9	1.54	27.9	5.8	2.3	3.5	60.3	111	19	12.1	5.17	3.84	59	403	19	2.96	0.53	1.26	1.22	14.4	51	36.86	28.1	11.96
953	9374	M	59	HAPC	76	159	59	23.3	81	91	87	175	94	4.4	6.39	216	602	94.2	33.8	359	139	23	26	1.1	74.8	45.8	1.58	29	12.8	7.4	5.4	42.2	103	77	19	4.59	5.48	52	343	14	4.71	0.76	1.14	3.22	20.4	61	40.14	33.7	14.4
961	3137	M	42	HAPC	72	166	54.7	20	71	88	89	110	87	5	6.43	218	663	103.1	33.9	329	174	26	43	1.7	82.2	41.6	1.02	40.6	14.6	9.1	5.5	37.7	128	43	17.3	3.24	2.81	37	332	17	4.36	0.84	1.55	2.44	31.4	66	34.87	47.4	16.8
1005	2916	F	47	HAPC	79	146	65.2	30.5	85	103	65	135	89	5.5	6.48	190	572	88.3	29.3	332	201	7	45	6.4	83.2	48.3	1.38	34.9	6.8	4.1	2.7	39.7	78	22	10.2	3.02	6.01	49	296	23	3.67	0.6	1.36	2.29	4.1	87	82.76	4.7	14.08
1009	2926	F	51	HAPC	71	153	60	25.6	69	93	81	159	98	4.5	6.38	198	586	91.8	31	338	95	18	28	1.6	88	49.5	1.29	38.5	7.3	4.3	3	41.1	135	149	15	4.51	4.73	70	311	18	5.32	1.56	1.87	3.14	24.8	53	28.22	46.8	17.77
1012	2893	M	31	HAPC	75	170	65.1	22.5	81	90	101	120	83	5.7	7.26	249	711	97.9	34.3	350	14	38	39	1	82.2	49.3	1.5	32.9	14.7	7	7.7	52.4	115	145	18.8	5.71	3.63	81	555	20	4.34	1.02	1.65	2.45	42.1	61	18.5	69.5	14.65
1051	2970	M	42	HAPC	90	166	51.3	18.5	70	84	82	100	80	4.6	6.69	227	674	100.7	33.9	337	69	21	29	1.4	71.4	44	1.61	27.4	13.5	6.9	6.6	48.9	103	21	14.8	5	7.49	65	304	20	4.23	0.86	1.34	2.7	40.6	51	10.2	79.9	12.05
1070	3040	M	37	HAPC	76	167	63.9	22.9	79	88	77	122	87	6.7	5.75	212	614	106.8	36.9	345	64	116	129	1.1	84.9	51.6	1.55	33.3	23.5	9.1	14.4	61.3	124	1813	15.5	5.33	2.45	48	414	17	6.11	0.88	2.63	3.29	36.3	48	11.59	75.8	11.89
1079	3058	M	44	HAPC	77	172.5	59.7	20	73	91	107	110	84	6.8	6.77	232	679	100.3	34.3	342	135	40	48	1.2	83.5	47.6	1.33	35.9	14.4	8.3	6.1	42.4	70	135	21.6	5.09	6.46	91	461	20	5.44	0.7	3	2.63	14.4	60	45.88	23.9	14.46
1085	3066	F	55	HAPC	77	150	59.3	26.2	72	93	78	160	111	6.2	6.14	191	561	91.4	31.1	340	168	32	27	0.8	89.5	48.7	1.19	40.8	7.3	2.4	4.9	67.1	138	152	11.8	2.77	5.12	63	353	18	4.93	1.27	1.1	3.15	6.7	66	58.8	10.2	19.02
1087	3056	M	30	HAPC	73	162	53	20.2	68	85	92	101	75	8.2	6.49	215	631	97.2	33.1	341	103	20	35	1.8	83.8	54.7	1.88	29.1	33.9	22.3	11.6	34.2	171	55	34.9	4.74	6.89	73	575	19	6.02	0.84	2.14	3.5	33.8	72	38.63	46.7	10.4
1090	3014	M	42	HAPC	79	167.5	56.8	20.2	65	86	93	131	80	6.2	6.6	214	644	97.6	32.4	332	131	26	41	1.6	89.6	51.6	1.36	38	20.7	14	6.7	32.4	78	68	16.7	4.78	5.17	88	466	25	5.95	0.82	2.74	3.15	38.4	59	20.63	65.1	18.75
1116	3225	M	31	HAPC	79	165	76.5	28.3	103	106	64	130	81	7.3	7.03	224	659	93.7	31.9	340	103	37	36	1	79.9	46.8	1.41	33.1	11.4	7.2	4.2	36.8	112	55	13.9	5.34	5.11	96	496	22	5.83	3.38	1.48	3.76	29.1	60	30.4	48.9	14.14
1118	3235	M	47	HAPC	80	168	97.4	34.4	118	110	90	141	92	5.1	6.21	221	642	103.4	35.6	344	134	30	30	1	78.3	44.2	1.3	34.1	9.4	4	5.4	57.4	94	71	10.6	4.56	3.38	70	531	18	5.17	2.13	1.32	3.39	28.5	62	33.52	46	15.87
1126	3219	M	38	HAPC	82	166	85.6	31.2	107	103	97	130	82	4.4	7.15	225	672	94	31.5	335	107	34	42	1.2	84.6	47.5	1.28	37.1	13.8	7.7	6.1	44.2	115	147	10.6	3.77	3.54	79	560	20	5.05	3.07	1.52	3.18	19.6	79	59.66	24.7	13.38
1133	3212	M	49	HAPC	89	177	76.3	24.3	97	97	69	144	90	6.3	6.52	220	651	99.8	33.7	338	76	130	70	0.5	77.2	47.2	1.57	30	15.6	9.6	6	38.5	95	264	12.5	4	5.59	86	449	21	5.83	2.69	1.59	3.81	44.8	62	16.84	72.7	9.85
1134	3243	M	22	HAPC	80	165	66.5	24.6	79	93	83	110	78	5.4	6.45	213	615	95.3	33	346	143	16	24	1.5	73.8	46.5	1.7	27.3	38.5	20.9	17.6	45.7	121	25	49.3	4.33	4.4	95	611	18	4.07	1.34	1.88	2.09	39.9	59	18.97	67.8	12.49
1136	3206	M	40	HAPC	77	167	75.5	27.3	98	99	98	125	80	6.3	5.93	210	603	101.7	35.4	348	94	110	56	0.5	80.1	47.5	1.46	32.6	12.7	8.5	4.2	33.1	113	206	14.8	3.36	4.95	81	484	20	7.3	4.63	1.68	4.54	33.3	62	28.75	53.7	10.94
1150	2584	M	37	HAPC	82	162.5	54.8	20.7	80	88	82	129	106	5.1	6.96	230	686	98.6	335	335	126	20	49	2.5	77.5	44.2	1.33	33.3	13.3	4.2	9.1	68.4	87	33	9.9	4	2.62	42	211	21	3.32	0.6	1.27	1.86	27.3	56	28.62	48.8	17.78
1158	2529	M	25	HAPC	87	165.5	70.5	25.8	89	96	84	120	81	8.5	6.22	212	597	96	34.1	355	163	53	37	0.7	71.9	47.9	2	24	14.9	5.8	9.1	61.1	100	77	19.9	4.29	6.73	73	570	19	3.76	1.38	0.96	2.33	24.6	59	34.76	41.4	8.58
1178	2548	M	43	HAPC	81	165	48.9	18	73	97	86	141	94	5.5	6.42	233	651	101.4	36.3	358	104	41	67	1.6	80.8	51.1	1.72	29.7	12.8	5.8	7	54.7	104	76	20.2	4.16	4.86	73	488	19	4.18	0.73	1.97	2.03	42.8	64	21.35	66.7	11.67
1204	2551	M	36	HAPC	86	162	68.8	26.3	88	94	104	120	109	8.1	6.75	231	667	98.8	34.2	346	164	51	29	0.6	77.6	49.5	1.76	28.1	27.7	15.2	12.5	45.1	136	76	23.4	3.96	3.17	61	424	17	5.11	1.64	1.06	3.43	34.8	63	28.1	55.3	9.48
1213	3305	F	58	HAPC	77	145	41.8	20	68	86	81	170	110	7.2	7.17	212	650	90.7	29.6	326	140	32	47	1.5	78.6	44.3	1.29	34.3	6.8	2.9	3.9	57.4	135	23	15.3	4.34	3.65	65	385	18	4.51	1.49	1.66	2.66	16.2	67	50.77	24.2	13.83
1214	3038	M	52	HAPC	79	162.5	69.8	26.3	84	94	127	140	94	8.6	6.25	212	617	98.7	33.9	344	204	40	48	1.2	95.4	52.7	1.23	42.7	15.5	7.3	8.2	52.9	128	209	29.4	4.71	3.03	63	444	15	6.02	0.78	1.82	3.82	15.6	63	47.26	24.8	18.18
1223	2542	M	44	HAPC	82	169	58.7	20.7	79	91	60	129	88	4.8	5.98	218	634	106	36.5	344	151	51	56	1.1	90.4	49.6	1.22	40.8	6.4	3.1	3.3	51.6	110	78	14.8	5.17	2.45	64	488	20	5.77	1.24	2.04	3.46	27.2	71	43.45	38.5	19.54
1234	3229	F	51	HAPC	74	156.5	65	26.4	89	103	76	120	82	3.6	6.66	211	644	96.7	31.7	328	97	18	25	1.4	77.4	43.3	1.27	34.1	14.2	7.7	6.5	45.8	132	5	10.6	2.82	3.52	56	229	18	3.47	1.46	1.6	1.83	34.6	57	22.09	61	16.29
1237	2684	M	30	HAPC	85	158	51.1	20.4	72	83	63	121	70	8.5	6.81	219	662	97.2	32.2	331	561	37	54	1.5	81.5	46.2	1.31	35.3	8.5	5	3.5	41.2	176	52	13.4	2.77	4.65	57	452	22	4.11	1.01	1.37	2.67	11.1	62	51	17.9	15.79
1262	646	F	55	HAPC	79	156.7	44.5	18.3	64	87	96	139	93	8.1	6.37	199	596	93.6	31.2	334	181	12	21	1.8	80	46.1	1.36	33.9	10.8	6.3	4.5	41.7	98	13	9.6	3.77	4.95	57	216	23	4.79	0.72	1.61	3.1	42.4	66	23.84	64	15.63
1265	611	F	45	HAPC	79	157	50.8	20.7	66	88	74	109	79	5.8	6.12	190	569	93	31	334	105	17	23	1.4	81.2	45.6	1.28	35.6	12.1	7.5	4.6	38	56	9	9.9	3.24	4.41	48	242	23	4.07	0.64	1.93	2.25	11.5	76	64.84	15.1	15.53
1284	2296	M	25	HAPC	84	175	78.9	25.8	93	98	106	130	90	8.5	6.17	211	603	97.7	34.2	350	167	83	73	0.9	92.4	54.7	1.45	37.7	14.7	9.9	4.8	32.7	140	240	34.8	4.51	3.56	67	320	11	6.12	2.24	1.29	4.33	30.3	81	51.15	37.2	11.31
1311	640	M	43	HAPC	80	166.5	53.6	19.4	70	90	98	130	81	5.3	7.11	224	679	95.5	31.5	330	137	19	33	1.6	78.5	46.1	1.72	32	10.1		4	34.4	82	9	15.5	4	4.87	68.9	309	19	5.22	0.98	2.08	3.09	37.9	75	37.04	50.6	11.73
1320	2284	M	44	HAPC	83	168	59.6	21.3	79	88	106	118	90	6.3	7.63	242	710	93.1	31.7	341	112	37	54	2.2	81.5	46.2	1.45	36.1	8.5	17	3.5	50.2	176	52	47	4.39	5.1	73	503	12	6.21	1.48	1.41	4.23	38.2	64	26	59.5	13.12
1330	2290	M	46	HAPC	82	162.5	60.2	22.6	80	87	101	165	119	6.4	7.04	246	737	104.7	34.9	334	58	33	37	1.2	82.9	48.1	1.45	32.9	15	18	4.2	40.9	114	41	32.2	4.18	4.69	75	361	18	4.7	0.64	1.58	2.98	9.5	52	26	46	15.01
1376	2044	M	47	HAPC	82	165	66.4	24.2	89	90	99	140	106	7.3	6.49	226	670	103.2	34.8	337	117	56	66	1.2	80.5	44.8	1.25	35.7	21.8	14.5	7.3	33.5	96	131	33.1	9.3	3.76	77	414	17	3.46	0.8	1.94	1.45	34.6	64	29.08	54.3	14.42
1395	2036	M	47	HAPC	78	166	74	26.9	92	96	93	121	83	7.8	6.86	243	721	105.1	35.4	337	135	10	21	2.1	70.9	47.2	1.99	23.7	15.4	8.2	7.2	46.8	87	14	21.5	2.3	6.06	96	416	21	3.25	0.63	1.42	1.62	24.1	15	-8.93	158.9	10.69
1408	2048	M	45	HAPC	79	165	72.8	26.8	92	99	104	113	87	7.2	6.38	210	622	97.5	32.9	338	68	77	56	0.7	91.2	50.8	1.26	40.4	15.5	11.1	4.4	28.4	104	184	30.6	4.1	3.02	79	604	12	8.75	6.52	1.59	4.13	14.4	78	63.35	18.5	11.39
1428	2047	M	50	HAPC	81	164	64.1	23.8	81	88	66	119	94	4.9	6.28	216	636	101.3	34.4	340	77	41	40	1	82.6	45.3	1.21	37.3	22.5	15.3	7.2	32	98	58	25.9	2.2	3.75	70	392	18	5.29	0.87	2.03	2.91	53.6	59	5.21	91.1	18.2
1429	918	M	37	HAPC	83	165	56.3	20.6	71	90	129	111	87	3.9	7.05	235	686	97.3	33.3	343	67	394	287	0.7	77.4	43	1.25	34.4	14.1	6.9	7.2	51.1	152	722	27.1	4.33	5.19	88	443	18	5.1	1.51	1.88	2.72	32.8	65	32.07	50.6	15.25
1442	2034	M	40	HAPC	81	180	94.2	29	100	100	92	133	83	5.2	6.64	225	677	102	33.9	332	54	82	45	0.5	83.4	51.9	1.65	31.5	20.8	13.8	7	33.7	138	107	63.5	4.6	4.79	76	498	20	5.84	1.84	1.59	3.21	24.8	74	49.39	33.4	12.71
1473	1011	M	49	HAPC	81	159.5	65.5	25.8	73	95	67	140	91	4.8	6.3	212	641	101.7	33.7	331	108	123	118	1	80.3	40.4	1.01	39.9	25.5	12.7	12.8	50.2	117	461	25.2	3.4	3.02	57	396	19	4.97	0.84	1.82	2.72	42.5	46	3.67	92.1	23.22
2205	3102	M	47	HAPC	79	163	47.3	17.7	66	81	78	122	83	5.8	7.25	231	677	93.4	31.9	341	100	28	40	1.4	80.5	44.9	1.26	35.6	9.5	5.2	4.3	45.3	81	57	21.2	2.7	6.49	82	450	16	5.36	0.74	1.99	3.09	10.6	53	42.3	20	14.93
1532	2231	M	53	HAPC	83	167	60.4	21.5	83	88	91	128	66	4.6	6.58	222	648	98.5	33.7	343	51	44	46	1	75.7	48.2	1.75	27.5	18.5	12.2	6.3	34.1	141	434	31.8	4.28	5.87	85	286	19	5.79	0.77	2.68	3.02	30.6	50	19.73	60.8	11.91
1586	2479	M	46	HAPC	88	164.5	63.5	23.5	89	96	83	120	88	6.5	6.26	211	603	96.3	33.7	350	176	29	82	2.5	86.5	51.3	1.86	25.4	27.7	9.9	8.7	50.1	43	128	14.5	4.13	4.86	73	488	19	4.18	0.73	1.97	2.03	19.4	72	53.08	26.8	10.67
1607	2230	M	55	HAPC	82	164.5	75	27.5	96	94	93	148	120	5.8	7.44	236	709	95.3	31.7	333	96	32	68	1.2	96.6	57.1	1.45	39.5	33.2	23.8	9.4	28.3	89	100	43.6	3.64	5.84	67	447	19	4.9	1.61	1.23	2.82	23.3	75	51.31	31.2	34.4
1608	2180
1617	2165	M	32	HAPC	87	168	75	26.6	96	94	89	119	90	8.8	7.83	227	710	90.7	29	320	49	89	79	0.7	76	56	1.23	41.1	17	17.78	8.9	32.4	152	126	44.4	5.71	5.8	61.8	458	18	4.35	1.87	0.98	2.6	24.7	78	53.27	31.7	12.35
1640	2238	M	48	HAPC	81	158.5	47.9	19	66	84	103	96	78	7.9	6.44	215	627	97.4	33.4	343	97	21	33	1.6	80.5	47.6	1.45	32.9	14.4	9.6	4.8	33.3	119	24	26.8	4.6	4.69	75	361	18	4.7	0.64	1.58	2.98	9.5	52	42.67	18.2	15.01
1661	2069	M	44	HAPC	85	168.5	77.6	27.3	100	100	96	121	85	7.5	7.12	216	665	93.4	30.3	325	54	66	39	0.6	82.9	53.2	1.79	29.7	11	6.5	4.5	40.9	152	79	37.2	4.5	6.6	66	417	13	4.83	1.76	1.02	3.21	16.2	62	45.45	26.3	13.77
1673	2210	M	33	HAPC	78	164	69.7	26	95	88	86	88	75	5.8	7.44	238	738	99.2	32	322	31	70	86	1.2	91.6	50.5	1.23	41.1	23.5	13.9	9.6	40.9	96	70	48.5	0.59	5.54	58	384	16	5.47	0.88	1.99	3.02	29	77	48.13	37.6	12.35
1680	2220	M	44	HAPC	63	162	63.8	24.4	84	91	107	115	99	4.7	6.88	237	740	107.6	34.4	320	39	54	46	0.9	88.7	47.3	1.14	41.4	7.1	3.7	3.4	47.9	100	88	32.7	4.34	4.71	80	342	13	5.97	1.37	1.21	4.29	16.1	46	29.55	35.3	20.05
1699	2119	M	57	HAPC	82	168	77.1	27.3	95	93	82	108	74	5.4	6.98	223	683	97.9	31.9	327	54	84	67	0.8	87.9	49	1.26	38.9	18	11.9	6.1	33.9	133	67	29.5	5.32	5.34	68	379	19	4.98	0.8	1.29	3.26	39.6	66	26.65	59.8	15.09
1704	2208	M	56	HAPC	77	167	74.1	26.5	90	46	96	138	102	4.1	7.12	235	715	100.4	33	329	80	41	90	2.2	92.1	44.8	0.95	47.3	23.7	11.8	11.9	50.2	93	152	41.4	1.47	4.09	64	453	16	5.38	1.03	2.74	2.39	31.6	68	35.96	46.8	19.57
1724	2639	M	46	HAPC	80	164.5	73.4	26.8	92	96	77	129	88	6	6.37	215	609	95.6	33.8	353	115	71	48	0.7	79.9	48.4	1.54	31.5	18.3	9.7	8.6	47	143	91	12	3.36	3.84	71	392	15	4.43	1.21	1.43	2.65	55.7	63	7.79	87.7	12.84
1730	2671	M	68	HAPC	76	163	56.5	21.5	76	90	69	150	98	4.5	6.77	228	656	96.9	33.7	348	42	22	29	1.3	77.4	47	1.55	30.4	5.4	4.4	1	18.5	80	22	9.2	3.77	3.19	48	181	16	4.94	0.58	2.07	2.84	24	51	27	47.1	13.12
1732	608	M	44	HAPC	80	167	55.9	20.1	69	87	106	123	80	7.4	6.94	224	651	93.8	32.3	344	80	17	36	2.1	85.7	48	1.03	38.8	15.4	13.5	4.98	37	89	123	14.9	4.41	5.66	69	395	26	4.87	2.41	1.56	2.98	16.9	67	54.83	34.12	17.95
1740	2631	M	30	HAPC	86	159	66.4	26.1	92	95	76	129	93	10.9	6.57	214	625	95.1	32.6	342	158	78	55	0.7	73.5	46.9	1.76	26.6	12.6	6.9	5.7	45.2	57	53	62.8	4.67	3.35	63	357	21	4.08	1.16	1.02	2.72	12.8	50	37.62	25.4	10.2
1777	2643	M	27	HAPC	81	162	51.3	19.4	70	82	93	130	88	4.9	6.59	210	624	94.7	31.9	337	93	24	35	1.5	72.6	47.2	1.86	25.4	15.9	9.9	6	37.7	96	3	18	4	2.94	66	326	18	3.08	0.61	1.29	1.76	22.8	57	33.87	40.2	10.67
1835	1062	M	41	HAPC	76	169.5	61.2	21.1	68	86	92	118	80	6.2	6.97	217	660	94.7	31.1	329	147	82	55	0.7	78.9	49.7	1.7	29.2	21.6	12.8	8.8	40.7	115	46	23	5.7	5.7	69	297	20	3.63	0.54	1.29	2.03	21.4	75	53.19	28.7	17.56
1871	896	M	62	HAPC	78	169	59.6	21	75	85	86	150	96	3.8	6.44	210	632	98.1	32.6	332	105	22	36	1.6	79.8	44.3	1.25	35.5	15.4	10.1	5.3	34.4	84	96	19.6	3.25	2.69	58	391	25	4.71	0.95	1.86	2.4	20.8	64	43.24	32.5	15.44
1873	871	M	34	HAPC	80	161.5	65	24.8	87	90	93	125	87	6.8	6.99	225	669	95.7	32.2	336	146	35	30	0.9	82.2	50.1	1.56	32.1	25.2	11.4	13.8	54.8	108	324	16.3	2.82	5.17	64	602	19	5.37	1.48	1.89	3.1	21.1	69	48.25	30.4	12.67
1875	344	M	28	HAPC	82	164	56.3	20.8	69	85	84	132	79	5.7	7.2	220	682	94.7	30.6	323	149	23	37	1.6	82.1	52.4	1.76	29.7	14.5	7.4	7.1	49	100	39	21.2	2.73	4.77	77	398	21	3.16	0.49	2.05	1.05	13.7	76	62.78	17.9	11.61
1878	1002	F	40	HAPC	86	161.5	60.2	22.9	72	93	92	108	71	5.8	6.07	196	589	97	32.3	333	99	23	28	1.2	78.7	47.1	1.49	31.6	5.8	4.5	1.3	22.4	138	13	13.4	4.7	3.62	67	259	20	5.06	1.13	1.49	3.22	10.8	60	49.39	17.9	11.86
1915	638	F	49	HAPC	77	164	80	29.7	100	98	97	125	103	4.9	7.16	231	677	94.6	32.3	341	67	62	34	0.5	75.9	48.1	1.73	27.8	12.3	8.2	4.1	33.3	67	396	13.7	3.36	4.27	76	577	18	5.98	3.16	1.28	3.16	27.8	57	28.9	49	10.59
1921	2324	M	47	HAPC	83	166	62.7	22.9	85	89	110	115	90	5.7	6.61	231	671	101.5	43.9	344	64	67	56	1.1	98	56	1.72	29.7	19	5.8	5.6	29	145	87	38.5	3.5	4.65	57	452	22	4.11	1.01	1.37	2.67	36.7	60	22.99	61.5	11.67
1926	2466	M	38	HAPC	85	169.5	76.4	26.3	89	100	70	141	103	8.7	6.57	213	617	93.9	32.4	345	103	57	86	2.3	88.8	52.1	1.45	36.1	26.3	17	7.9	33.3	43	79	3.3	4.91	5.09	45	332	20	1.02	0.96	0.19	0.46	31.5	62	30.79	50.6	13.12
1930	2206	M	47	HAPC	81	163	58.5	22.2	85	86	95	132	101	5.7	6.78	218	671	99	32.2	325	101	12	26	2.2	86.5	50.1	1.38	36.4	11.4	7.6	3.8	33.3	81	12	38.8	2.62	6.55	62	314	13	5.44	1.38	1.89	2.86	18	74	56.29	24.2	14.02
1941	867	F	54	HAPC	68	151	47.1	20.6	69	90	94	170	121	6.8	6.57	195	594	90.4	29.7	328	94	24	64	2.7	85.7	48	1.27	37.7	14.4	5.4	9	62.5	170	15	11.6	5.34	5.12	61.9	487	19	3.7	0.9	1.34	2.24	36.7	74	37.49	49.5	13.9
1962	2183	M	36	HAPC	83	176.5	66.7	21.4	82	95	105	110	90	5	6.57	220	659	100.3	33.5	334	112	165	133	0.8	93.8	53.9	1.35	39.9	23.8	15.7	8.1	34	96	170	23.6	4.59	2.88	80	494	17	6.96	2.3	1.81	4.3	18.5	75	56.95	24.5	15.18
1965	2225	M	25	HAPC	86	167.5	56.5	20.2	73	84	93	110	87	4.1	6.23	219	636	102.1	35.2	344	140	64	88	1,4	89.8	53.2	1.45	36.6	24.6	14.3	10.3	41.9	85	65	33.2	4.89	3.08	42	240	19	3.63	0.71	1.71	1.71	37.5	89	51.49	42.1	36.8
2002	478	M	49	HAPC	75	166	61	22.1	79	87	82	100	80	5.4	6.89	214	671	97.4	31.1	319	134	37	45	1.2	88.8	50.4	1.31	38.4	22.7	13.3	9.4	41.4	81	98	40.7	1.69	4.73	70	351	19	5.33	0.72	2.99	2.44	43.1	65	22.2	66	18.75
2017	2180	M	49	HAPC	85	165	67.9	25	91	96	97	136	86	8.2	6.72	213	652	97	31.7	327	119	100	93	0.9	87.4	53	1.54	34.4	29.4	20	9.4	32	186	286	22.8	4.51	3.3	64	499	16	6.39	3.24	1.78	3.49	62.9	74	10.72	85.4	12.02
2055	656	F	27	HAPC	83	149.5	52	23.1	67	87	84	91	69	5.9	5.94	193	577	97.1	32.5	334	132	19	33	1.7	78.5	46.1	1.42	32.4	10.1	6.1	4	39.6	82	9	8.7	4.23	4.89	58	300	20	3.38	0.58	1.47	1.89	33.6	71	37.68	47.1	14.42
2063	2762	M	40	HAPC	74	167.5	62.2	22	78	89	76	115	85	5.3	6.3	214	618	98.1	34	346	54	16	59	3.7	81.6	45.7	1.27	35.9	11.2	5.7	5.5	49.1	84	77	18.6	3.06	2.62	50	341	23	3.32	0.68	1.8	1.59	39.2	55	16.06	70.9	15.91
2092	2791	M	44	HAPC	77	166.5	52.1	18.6	67	83	73	101	75	5.8	6.82	213	628	92.1	31.2	339	150	14	32	2.3	77.1	42.6	1.23	34.5	11.8	7.4	4.4	37.3	111	8	15.6	2.87	5.31	71	352	23	4.33	1.52	1.55	2.51	27.8	56	27.87	49.9	15.85
2093	218	M	63	HAPC	74	170	65	22.5	90	97	68	171	111	4.8	7.25	220	655	90.3	30.3	336	121	18	27	1.5	79	41.2	1.09	37.8	13.3	5.4	7.9	59.4	137	104	13.5	4.09	2.5	64	569	27	4.25	0.76	1.28	2.64	10.6	51	40.24	20.8	19.58
2144	2114	F	38	HAPC	87	170	72.4	24.9	89	97	63	120	94	6.4	6.1	198	565	92.6	32.5	350	140	68	46	0.7	82.6	50.9	1.61	31.7	17.4	12.8	4.6	26.4	89	31	21.3		6.52	62	440	22	5.85	1.26	1.25	4.07	40.8	70	29	58.5	14.9
2161	2870	M	51	HAPC	77	159	60.5	24.1	76	90	94	139	86	5.5	6.3	221	605	96	35.1	365	85	22	77	3.5	78	45.7	1.41	32.3	17.2	6.1	11.1	64.5	92	151	13.4	4.95	2.28	68	447	18	4.91	1.32	2.05	2.58	35.9	53	16.78	68.1	11.97
1628	2166	M	49	HAPC	81	160.5	73.3	28.2	85	93	106	118	86	5.6	6.11	231	641	104.9	37.8	360	102	53	82	1.5	88.2	51.4	1.4	36.8	56.5	40.8	15.7	27.8	102	291	29.4	4.5	3.61	48	372	13	5.42	1.23	1.68	3.31	63.6	76	12.53	83.5	13.95
2197	2064	M	43	HAPC	87	165.5	69.1	25	91	91	82	125	93	7.5	6.58	227	646	98.2	34.5	351	117	54	57	1.1	82.9	45.8	1.23	37.1	19.5	12.3	7.2	36.9	111	218	52.7	1.79	2.99	73	448	17	5.65	2.74	1.27	3.14	30.7	63	32.43	48.6	13.93
8006	8006	M	44	HAPC	86	166	70	25.4	89	95	68	152	102	4.3	8.19	230.1	68.41	83.52	28.1	336	113	24	22	1	61	33	1.62	28	21.5	10.2	8.3	41.3	129	24	13.88	4.4	8.5	92	517	18	5.42	1.5	1.04	1.04	15.1	49	28.04	10.9	12.11
2265	3095	M	54	HAPC	80	167	65.8	23.7	81	89	85	129	80	3.7	7.01	243	660	94.2	34.7	368	83	29	29	1	76.8	46.3	1.52	30.5	6.9	3.3	3.6	52.2	81	44	10	1.79	4.41	63	287	17	4.55	0.63	0.94	3.19	14.9	70	55.17	21.3	14.3
2271	2240	M	37	HAPC	79	174.5	89.7	29.4	103	97	94	135	92	5.7	7.19	225	692	96.2	31.3	325	30	22	29	2.2	77.4	47	1.46	35.2	5.4	19	1	33.3	80	22	11	4.71	5.06	46	303	22	5.43	0.97	2.16	3.22	34.5	89	54.17	38.9	12.28
2275	2936	M	43	HAPC	76	158	47.6	19.2	70	83	107	116	70	4.5	6.76	223	651	96.3	33	343	109	20	35	1.8	86	48.9	1.32	37.1	17.3	10.4	6.9	39.9	108	81	14.7	4.59	4.71	61	449	16	4.79	1.26	2.03	2.49	47.4	67	19.5	70.9	15.25
2284	2892	F	50	HAPC	81	151	43.6	19.3	59	82	70	159	98	4.8	6.59	206	611	92.7	31.3	337	66	37	53	1.4	81.1	44.8	1.23	36.3	12.8	6.3	6.5	50.8	110	20	10.1	5.32	4.42	56	190	19	3.43	0.8	1.33	1.95	20.6	60	39.77	34.1	19.99
2286	2055	M	46	HAPC	77	176	74.6	24.2	89	96	105	167	111	3.5	6.94	231	728	104.9	36.7	350	42	12	17	1.4	70.9	44.3	1.67	26.6	13.6	8.9	4.7	34.6	59	20	13.4	3.4	4.3	59	242	15	5.25	0.76	1.81	3.34	11.8	70	58.6	16.8	13.2
2288	3100	F	53	HAPC	76	162	48.3	18.3	60	86	60	100	73	6.3	5.93	191	573	96.6	32.2	333	59	24	39	1.6	88	47.1	1.15	40.9	12.2	6.4	5.8	47.5	111	18	12.5	2.05	4.83	78	287	18	4.58	0.82	2.4	2.21	23.2	52	28.83	44.6	18.18
2289	2417	M	38	HAPC	66	168.5	59.6	21	71	83	82	109	89	3.9	6.24	220	654	104.8	35.3	336	77	29	82	2.8	86.5	51.3	1.46	35.2	27.7	19	8.7	31.4	43	128	62.8	4.45	5.06	46	303	22	5.43	0.97	2.16	3.22	29.4	78	48.76	37.6	12.28
2301	2187	M	32	HAPC	85	165	69	25.3	88	90	72	115	91	7.5	6.64	218	634	95.5	32.8	344	80	41	30	0.7	78	51.6	1.95	26.4	21	14	7	33.3	136	117	30.1	4.61	3.4	63	354	16	4.13	0.82	1.53	2.42	44	64	19.96	68.8	11.35
2310	604	M	37	HAPC	76	168	58	20.5	72	88	68	113	80	5.2	6.58	239	682	103.6	36.3	350	57	30	47	1.6	78.5	46.1	1.09	37.8	19.4	5.4	4.3	24.1	81	112	16.3	5.66	6.21	51	387	20	4.52	2.62	1.83	2.59	33.1	56	40.24	25	19.58
1307	2311	M	27	HAPC	85	165	59.4	21.7	80	85	95	115	99	7.7	6.74	213	629	93.3	31.6	339	83	61	64	1	93.6	57.8	1.61	35.8	18.7	13.3	5.4	28.9	148	75	33.2	4.59	5.1	73	503	12	6.21	1.48	1.41	4.23	19.6	70	50.47	28	14.26
2353	2852	M	27	HAPC	80	162.5	51.8	19.6	65	84	75	110	85	8.9	6.71	220	638	95	32.8	345	559	32	35	1.1	77.2	47.6	1.34	28.9	15.4	9.6	5.8	37.7	98	80	10.7	4.16	5.2	52	324	19	3.5	1.96	1.56	1.79	23.9	54	37.89	38	13.34
2361	558	M	40	HAPC	83	183	69.1	20.6	69	90	72	125	89	4.7	5.17	165	476	92.1	31.9	347	206	74	92	1.2	88.5	47.8	1.17	40.7	7.1	4.4	2.7	38	115	71	10.1	3.79	6.36	57	323	21	4.28	0.62	1.55	2.63	6.7	72	65.55	9.3	20.65
2366	3272	M	61	HAPC	75	162.5	49.9	18.8	72	86	81	135	84	5.8	6.65	213	642	96.5	32	332	140	15	34	2.3	80.2	45.7	1.32	34.5	6.8	3	3.8	55.9	131	216	20.5	2.8	7.71	91	595	10	5	1.52	1.79	3.1	14	60	45.73	23.4	13.12
2367	3293	M	38	HAPC	85	166	59.2	21.4	73	91	101	120	88	7.1	6.18	216	621	100.5	35	348	123	58	71	1.2	74.3	47.6	1.78	26.7	10.3	4.7	5.6	54.4	106	100	15.2	3.01	4.83	98	462	18	4.37	1.47	1.55	2.7	20.9	64	43.1	32.7	10.78
2378	3220	M	37	HAPC	80	166	79.2	28.7	101	100	82	101	74	6.1	7.3	225	682	93.4	30.8	330	117	80	73	0.9	81.2	49.7	1.58	31.5	17.5	7.4	10.1	57.7	102	320	20.6	4.23	3.35	85	363	17	3.9	1.62	1.38	2.24	55.9	108	52.54	51.5	10.78
2438	554	M	41	HAPC	80	177	78.9	25.2	96	94	66	141	94	5.9	7.14	237	716	100.3	33.2	331	85	115	115	1	82.1	52.4	1.65	37.3	14.5	7.89	7.1	20.42	86	362	13.2	3.67	5.21	75	495	18	5.24	1.62	1.26	3.37	25.9	66	40.01	39.3	13.9
2441	2981	M	53	HAPC	78	164.5	64.2	23.5	88	93	75	178	108	7.6	6.55	215	651	99.4	32.8	330	110	16	25	1.6	72.9	44.8	1.59	28.1	19.5	12	7.5	38.5	117	90	15.3	5.03	4.31	63	683	19	5.15	2.58	1.06	2.91	33	61	28.28	53.9	10.46
2460	2959	F	50	HAPC	87	169	50.5	17.9	72	89	78	120	82	7.9	6.27	200	575	91.7	31.9	348	105	12	27	2.3	73.3	44.4	1.54	28.9	8.8	3.9	4.9	55.7	58	47	14.2	4.61	2.05	46	258	17	3.33	0.45	1.84	1.31	25.8	44	17.98	58.9	13.93
2496	2210
2556	1080	M	47	HAPC	74	168	72.3	25.5	88	95	92	120	100	5.1	6.93	239	701	101.2	34.5	341	30	21	32	1.5	90	44.6	0.98	45.4	10.7	5.4	5.3	49.5	113	114	34.7	6.6	4.29	58	455	25	6.12	1.62	1.35	3.78	28.6	68	39.14	42.2	20.08
1129	3205	M	54	HAPC	74	166.5	69.6	25.1	92	101	75	120	80	4.5	7	215	633	90.4	30.7	340	140	17	28	1.6	71.6	44.3	1.62	27.3	4.6	2.1	2.5	54.3	74	86	13.4	4.78	3.01	72	559	17	4.32	1.63	1.71	2.43	15.8	64	48.68	24.5	12.49
8001	8001	M	64	HAPC	84	170	91	31.5	90	96	78	135	80	6.15	8.18	248.1	71.41	87.3	30.3	347	53.4	33	30	2.2	60	33	1.38	27	32.8	18.7	14.1	44.3	123	88	17.65	5.77	3.95	77	456	22	3.46	1.55	0.87	2.15	17.9	67	35.87	24.9	14.93
8002	8002	M	36	HAPC	82	171	68	23.3	85	88	88	138	102	7.59	8.32	248.1	77.73	93.4	29.8	319	113.4	49	50	1.7	85	47	1.67	38	79	47.1	31.9	39.4	99	45	15.95	2.42	4.34	105	551	21	4.55	0.97	1.2	3.2	18.2	52	28.04	24	14.15
8003	8003	M	53	HAPC	76	160	65	25.4	80	90	93	130	75	5.51	8.15	269.3	79.93	98	33	337	77.4	23	26	2	51	26	1.67	25	29.7	16.3	13.4	44	124	78	15.89	4.72	7.4	85.8	510	20	5.46	0.84	1.15	4.15	11.6	82	46.6	39.2	8.74
8004	8004	M	47	HAPC	86	165	70	25.7	80	88	73	143	98	10.26	7.5	220	69.12	87	32.8	313	153	30	26	1.8	58	33	1.23	25	32	13.8	18.2	36.4	125	86	13.34	5.36	5.3	53.2	374	13	3.1	0.74	0.78	2.2	11.5	48.6	37.1	35.9	5.8
8005	8005	M	46	HAPC	74	169	74	25.9	96	98	104	140	100	4.11	8.79	222.1	69.81	88.2	27.7	298	132	26	28	2.4	63	32	1.32	31	26.5	14	12.5	28.8	134	51	16.22	3.97	6.1	71.2	667	19	3.52	0.75	0.94	2.63	19	61	6.1	38.7	17.15
8008	8008	m	56	HAPC	79	173	81	27.1	97	98	80	126	74	5.68	6.78	226.1	65.31	96.3	33.3	346	128	37	30	1.9	78	33	1.11	36	32	9.6	9.3	41.8	84	78	33.78	5.34	4	55.3	381	15	4.72	1.82	0.82	3.33	16.1	53	46.6	32	15.73
8010	8009	m	43	HAPC	75	165	107	39.3	95	98	75	110	80	4.23	8.34	224	74.31	89.1	26.9	301.2	106.4	55	34	0.9	73	34	1.66	39	17.9	10.2	8.3	43.6	88	65	12.78	4.65	4.5	66.9	523	17	3.38	1.38	0.82	2.23	32.5	68	38.11	27	15.03
8010	8010	m	25	HAPC	70	180	79	24.4	90	90	84	120	80	4.92	7.97	230.1	74.71	93.7	28.9	308.2	137.4	39	26	0.9	66	36	2.03	30	18.1	22.5	7.9	45.6	98	12	94.52	4.42	3.3	78.8	342	24	4.8	1.16	0.89	3.71	14.6	50	40.3	56.5	17.71
8011	8011	m	34	HAPC	70	175	118	38.5	100	103	95	140	110	7.88	8.11	211.1	74.21	91.5	26	284.2	56.4	24	55	1.1	65	32	1.59	29	40.6	10	18.1	46.3	92	89	13.13	4.83	5.8	78	685	19	3.97	1.07	0.88	2.81	23	65	28.86	44.7	15.14
9679	851	M	32	HAPC	83	170	70	24.2	80	94	95	90	71	8	7.02	235	654	93.2	33.5	359	128	44	33	0.8	75.6	46.4	1.59	29.2	8.3	5.2	3.1	37.3	140	69	14	4.17	4.32	73	437	14	4.98	2.71	1.22	2.89	16.3	52	35.99	31.2	11.03
5	9775	M	30	Control	90	166	63	22.9	74	91	166	111	68	11.1	5.27	166	476	90.3	31.5	349	167	26	28	1.1	75.4	46.5	1.61	28.9	10	5.4	4.6	54	92	34	21.2	3.22	4.19	63	225	18	3.4	0.83	1.36	1.82	3.7	60	55.92	6.2	11.74
7	9777	F	41	Control	87	149.5	48	21.5	65	87	83	111	71	4.9	4.63	147	437	94.4	31.7	336	164	17	19	1.1	65.3	41	1.69	24.3	7.4	3.2	4.2	43.2	54	12	8.7	3.69	2.99	34	351	18	4.74	0.66	1.5	3.4	32	57	24.61	56.5	11.1
10	9780	F	44	Control	83	158	53	21.2	62	88	59	107	80	6.2	5.78	145	467	80.8	25.1	310	134	15	28	1.9	78.2	46.8	1.49	31.4	10.8	4.5	6.3	41.7	88	12	11	5.15	7.76	41	200	20	6.66	0.98	2.32	3.97	6.1	76	69.43	8.1	11.21
12	9782	M	44	Control	82	158	50	20	69	84	75	111	85	6.4	5.68	177	508	89.4	31.2	348	141	18	39	2.2	65.6	41.6	1.73	24	8.5	4.3	4.2	50.6	110	35	14	3.22	4.39	44	238	20	3.82	0.5	1.79	1.92	11.1	54	43.39	20.4	11.5
20	9791	F	44	Control	82	155	50	20.8	68	88	63	103	68	6.5	5.24	144	435	83	27.5	331	266	17	25	1.5	66.2	38.9	1.42	27.3	7.1	3.1	4	43.7	72	46	8.6	3.58	3.56	39	287	16	5.71	0.44	2.3	3.46	9.1	69	59.86	13.2	12.31
24	9796	M	33	Control	81	161	57	22	73	89	81	100	67	6.6	5.52	173	503	91.1	31.3	344	126	21	23	1.1	70	43.3	1.62	26.7	8.6	4.3	4.3	50	102	13	11.4	4.79	4.8	53	334	19	4.1	1.1	1.31	2.66	11.5	49	37.26	23.6	12.95
25	9795	F	53	Control	82	154	60	25.3	77	94	79	145	85	6.9	5.32	155	466	87.6	29.1	333	104	14	22	1.6	74.4	44.3	1.47	30.1	11	4.8	6.2	43.6	152	23	13.1	3.56	4.81	48	325	18	5.74	0.66	1.95	3.82	14.7	66	51.42	22.2	12.6
28	9799	M	46	Control	83	172	66	22.3	74	96	77	113	86	6.5	6.4	176	542	84.7	27.5	325	179	14	22	1.6	70.8	38.2	1.17	32.6	4.9	2.4	2.5	49	69	12	13.8	3.32	3.14	58	243	20	4.57	0.61	1.79	2.74	8.1	51	42.47	16	15.61
33	9724	F	48	Control	86	161	53	20.4	67	90	52	114	78	5.3	4.94	158	468	94.7	32	338	159	16	20	1.3	74.6	44.8	1.5	29.8	14.4	5	9.4	34.7	79	14	55.4	4.92	3.61	60	244	25	4.53	1.15	1.48	2.55	11.4	64	52.57	17.8	14.51
39	9711	F	50	Control	85	164	47	17.5	60	83	80	127	82	7.1	5.01	148	437	87.2	29.5	339	237	10	18	1.8	79.1	37.8	0.92	41.3	6.9	3.1	3.8	44.9	73	13	9.7	4.95	5.61	46	306	21	3.22	0.55	1.3	1.54	15.1	49	34.27	30.6	19.06
46	9565	M	55	Control	80	167	55	19.7	68	90	67	127	86	5.9	5.72	174	515	90	30.4	338	193	27	27	1	70.9	43.8	1.62	27.1	14.3	6.1	8.2	42.7	110	28	31.2	4.55	4	64	301	24	3.89	0.54	1.64	1.7	29.3	73	43.86	40	12.76
47	9537	F	36	Control	88	157	55	22.3	69	91	60	98	68	5.8	4.4	156	456	103.6	35.5	342	107	20	32	1.6	71.6	41.4	1.37	30.2	8.6	2	6.6	23.3	75	2	10	3.88	3.86	54	293	19	4.75	1.13	1.39	2.62	27	56	29.48	47.8	14.38
54	9541	F	47	Control	88	161	61	23.5	76	94	73	114	73	5.4	4.76	121	367	77.1	25.4	330	265	16	22	1.4	76.4	39.6	1.08	36.8	5.8	2.4	3.4	41.4	56	9	7	4.74	3.61	46	236	18	3.7	0.62	1.26	1.99	5.3	71	65.6	7.5	17.53
56	9538	F	38	Control	82	160	66	25.8	77	100	67	114	77	3.8	5.19	156	463	89.2	30.1	337	145	12	20	1.7	71.6	40.7	1.32	30.9	13.8	4.3	9.5	31.2	55	6	10.4	3.8	6.01	49	273	17	4.07	0.68	1.2	2.51	10.4	63	52.5	16.5	13.27
58	9534	F	42	Control	88	151	48	21.1	67	87	57	114	86	5.3	4.38	146	428	97.7	33.3	341	166	28	33	1.2	76.1	43.6	1.34	32.5	15.6	4.9	10.7	31.4	76	26	10.1	4.69	3.75	44	340	20	5.01	0.84	2	2.19	13.5	63	49.07	21.6	14.86
59	9584	F	44	Control	82	152	54	23.4	72	90	75	128	81	7.8	5.81	150	461	79.3	25.8	325	117	18	22	1.2	80.3	37	0.85	43.3	10.4	3.2	7.2	30.8	96	21	10	4.07	3.73	57	236	21	5.64	1.28	1.59	3.26	13.5	75	61.63	18	18.85
63	9639	F	37	Control	82	146	45	21.1	63	86	67	109	71	5	5.05	157	461	91.3	31.1	341	128	45	36	0.8	65.3	40.6	1.64	24.7	9.5	3.1	6.4	32.6	113	9	6.8	4.73	2.79	40	340	17	4.53	3.1	1.75	2.06	13.5	59	45.66	22.8	11.62
68	9591	F	46	Control	81	164	66	24.5	78	104	77	111	72	7.4	5.58	152	477	85.5	27.2	319	221	15	21	1.4	75.9	45	1.46	30.9	6.7	2.3	4.4	34.3	89	17	8	4.61	4.52	47	277	23	4.34	1.17	1.37	2.2	5.3	79	73.9	6.7	14.02
69	9498	F	45	Control	83	155	45	18.7	65	84	74	135	76	3.7	4.61	145	425	92.2	31.5	341	185	17	29	1.7	78.9	42.2	1.15	36.7	10.9	4.2	6.7	38.5	88	12	11.5	4.36	6.97	42	230	21	3.43	0.79	1.09	1.77	9.7	59	49.44	16.4	17.05
73	9583	F	45	Control	85	154	43	18.1	63	84	67	112	70	5.8	4.8	134	411	85.6	27.9	326	108	13	25	1.9	78.9	46.8	1.46	32.1	13.8	4.9	8.9	35.5	84	16	8	4.46	3.55	45	175	21	4.36	0.69	1.63	2.22	6.4	81	74.46	7.9	15.76
74	9600	F	44	Control	84	155	52	21.6	67	89	77	144	76	4.9	4.9	138	422	86.1	28.2	327	140	21	27	1.3	73.8	43.2	1.41	30.6	19.7	7	12.7	35.5	62	11	10.3	4.65	4.45	67	269	19	4.18	0.77	2.08	1.06	13.5	71	57.26	19.1	14.68
78	9576	F	51	Control	76	151	51	22.4	69	90	59	144	83	4.9	5.4	146	451	83.5	27	324	202	15	19	1.3	83.9	49.4	1.43	34.5	12	4.4	7.6	36.7	73	15	8.9	5.26	4.95	45	212	21	4.91	1.38	1.71	2.31	6.6	88	81.19	7.5	14.74
83	9540	F	42	Control	79	151	38	16.7	62	79	86	121	79	5.7	4.78	154	457	95.6	32.2	337	137	33	39	1.2	83.5	46.8	1.28	36.7	12.7	5.4	7.3	42.5	93	27	13	4.83	2.84	38	244	20	3.07	0.58	1.21	1.36	16.1	69	53.05	23.3	15.82
90	9516	F	42	Control	87	148	47	21.5	63	87	80	111	82	5.3	4.51	142	425	94.2	31.5	334	194	16	25	1.6	85.2	44.7	1.1	40.5	10	4.2	5.8	42	83	12	20.1	4.88	7.06	62	305	19	4.32	1.3	1.47	2.16	22.4	62	39.5	36.2	18.88
103	9555	F	34	Control	85	154	48	20.2	65	84	69	136	86	9.3	5.83	151	465	79.8	25.9	325	192	15	18	1.2	82.9	45.2	1.2	37.7	28.8	10.4	18.4	36.1	91	13	9.1	4.59	3.4	52	345	18	3.85	0.83	1.28	1.87	4.8	79	74.07	6.1	16.73
128	185	F	42	Control	76	152	39	16.9	59	78	79	94	67	5.6	4.42	138	425	96.2	31.2	325	188	15	38	2.5	74.1	44.7	1.52	29.4	6.9	3.2	3.7	46.4	95	24	8.7	3.81	4.93	63	225	24	3.24	0.38	2.05	1.14	9.2	58	48.83	15.9	14.87
138	9546	F	37	Control	81	160	66	25.8	79	98	71	114	67	3.2	4.71	127	394	83.7	27	322	123	27	35	1.3	78.1	41.9	1.16	36.2	6.7	2.1	4.6	31.3	64	9	13.1	2.81	5.84	55	252	17	4.87	1.1	1.57	2.81	6.4	90	83.54	7.1	14.13
140	9527	M	32	Control	90	160	48	18.8	62	83	63	114	77	7.6	5.44	175	496	91.2	32.2	353	143	19	20	1.1	76.3	47.8	1.68	28.5	10.3	3.9	6.4	37.9	91	23	21	4.97	2.95	53	318	21	4.69	1.02	1.21	3.02	8.4	56	47.7	15	11.4
148	9566	M	31	Control	79	170	55	19	65	90	89	101	76	10.5	5.59	177	510	91.2	31.7	347	175	31	31	1	77.1	47.1	1.57	30	10.1	4.7	5.4	46.5	154	32	9.1	4.61	5.32	73	401	24	3.53	0.89	1.55	1.23	19.2	62	43.29	30.7	12.13
161	9587	F	44	Control	81	158	52	20.8	65	90	90	125	83	6.3	5.58	154	458	82.1	27.6	336	135	18	25	1.4	73.8	44.3	1.5	29.5	14	5.6	8.4	40	49	14	10	3.88	4.42	51	293	22	3.47	0.37	1.37	1.58	8.5	78	69.34	10.9	14
165	9592	M	41	Control	83	177.5	65	20.6	70	94	81	118	78	7.3	5.26	175	500	95.1	33.3	350	216	21	22	1	71.2	41.6	1.41	29.6	12.8	4.4	8.4	34.4	100	42	9.5	4.67	4.01	64	373	23	4.87	0.95	1.37	2.88	18.3	55	36.46	33.4	13.57
169	9569	M	53	Control	86	164	68	25.3	92	100	77	106	76	4.6	5.14	174	483	94	33.9	360	99	49	30	0.6	69.4	43.5	1.68	25.9	14	4.6	9.4	32.9	110	37	14.5	5.08	4.96	75	347	26	5.7	1.11	1.16	4.23	27.8	54	26.54	51.2	12.32
177	9602	F	60	Control	83	151	55	24.1	81	95	64	128	82	5.4	4.93	149	431	87.4	30.2	346	184	22	23	1	71.3	41.7	1.41	29.6	10.4	3.7	6.7	35.6	131	33	13	4.24	4.71	50	362	18	4.51	1.47	1.24	2.74	13.1	49	36.13	26.6	14.57
181	9556	F	35	Control	84	158	50	20	66	87	64	113	76	5	4.83	141	425	88	29.2	332	145	14	20	1.4	72.3	40	1.24	32.3	10.8	3.5	7.3	32.4	105	26	8.3	4.58	5.51	49	233	21	4.82	0.71	1.64	2.6	13.2	87	74.18	15.1	12.3
204	9719	F	44	Control	87	153	48	20.5	69	86	68	115	82	6.2	5.18	158	467	90.2	30.5	338	106	20	22	1.1	70.9	42.1	1.46	28.8	15.5	6.4	9.1	41.3	64	19	8.1	4.77	4.33	57	239	21	3.34	0.78	1.05	2.05	15.5	50	34.33	31.1	14.66
223	2790	F	47	Control	83	155.5	47.9	19.7	61	86	74	90	65	7.3	4.96	153	451	90.9	30.8	339	196	22	29	1.3	75.5	43.1	1.33	32.4	12.2	5.1	7.1	41.8	95	16	10.2	4.13	4.75	51	173	18	4.42	0.62	1.98	2.39	11.8	44	31.92	27	16.35
226	9734	M	48	Control	88	164	50	18.6	76	85	63	112	82	4.7	5.06	162	468	92.5	32	346	221	16	22	1.4	64.8	39.3	1.54	25.5	5.2	2.8	2.4	53.8	89	49	10.5	4.05	5.07	56	220	21	4.25	0.78	1.27	2.26	14	51	37.36	27.3	13.8
230	9736	M	38	Control	78	166	50	18.1	68	83	62	77	55	6.1	5.89	173	528	89.6	29.4	328	164	22	21	1	71.9	43.2	1.51	28.7	19.1	7.5	11.6	39.3	130	76	13.9	4.39	5.24	54	458	23	4.19	0.75	1.22	2.67	33.7	55	20.84	61.8	13.93
233	9740	F	46	Control	78	159	50	19.8	67	86	97	127	78	5.9	5.2	152	457	87.9	29.2	333	167	30	29	1	70.4	43.3	1.6	27.1	22.2	9.6	12.6	43.2	109	29	9.4	5.31	5.22	58	208	20	3.04	1.01	1.34	1.21	40.6	66	25.16	61.7	13.26
235	9742	M	56	Control	81	163	50	18.8	72	85	80	125	76	6.8	5.38	166	493	91.6	30.9	337	156	28	25	0.9	76.8	42.7	1.25	34.1	7.3	3.1	4.2	42.5	138	28	18.1	4.62	3.89	58	321	21	4.21	1.49	1.23	2.55	17.7	58	40.32	30.5	15.58
239	9731	M	51	Control	87	164	55	20.4	74	86	68	125	82	5.6	5.51	164	494	89.7	29.8	332	131	26	30	1.2	78.4	45.7	1.4	32.7	8.3	3.5	4.8	42.2	92	25	10.8	4.65	7.66	69	338	21	3.92	0.69	1.47	1.89	14.3	51	36.63	28.1	14.76
244	2799	F	36	Control	79	156	47.8	19.7	67	83	81	110	80	5.2	5.61	151	471	84	26.9	321	159	11	23	2.1	80.9	46.9	1.38	34	11.1	3.8	7.3	34.2	77	11	10.2	3.7	3.59	50	264	20	5.39	1.86	1.44	3.52	15.9	78	61.78	20.5	15.55
247	2786	F	38	Control	81	154	44.5	19	59	82.5	56	110	82	5.1	5.29	145	451	85.3	27.4	322	146	10	25	2.5	78.9	43.3	1.22	35.6	6.3	2	4.3	31.7	82	14	9.7	3.55	4.3	54	209	17	4.81	0.76	1.6	3.05	11.7	68	55.85	17.3	14.76
251	2796	M	48	Control	80	163.5	56.4	20.8	77	87	72	110	74	6.3	4.91	153	440	89.6	31.2	348	222	20	39	2	76.9	45.5	1.45	31.4	11.2	4.4	6.8	39.3	100	21	10.2	4.19	5.87	63	439	24	4.43	1.13	2.26	2.11	10.4	54	43.76	19.2	13.77
259	2797	F	42	Control	78	156.5	53.6	21.9	68	89	60	110	70	4.1	5.85	133	434	74.2	22.7	306	130	9	37	4.1	79.4	45	1.31	34.4	9.3	3.7	5.6	39.8	96	13	9.4	3.33	4.02	51	301	22	4	0.64	1.88	2.21	6.5	92	85.41	7.1	16.07
271	9802	M	30	Control	86	162	50	19.1	64	79	108	127	57	6.2	5.11	176	489	95.7	34.4	360	149	55	51	0.9	70.2	45.2	1.81	25	9.9	3.8	6.1	38.4	93	39	19.5	3.36	2.17	55	353	20	4.11	1.21	1.43	2.03	21.3	60	38.41	35.7	9.12
274	2346	M	32	Control	92	174.5	70.4	22.9	91	93	64	115	87	5	5.63	177	520	92.4	31.4	340	103	48	49	1	81.5	49.6	1.55	31.9	10.2	2.9	7.3	28.4	44	74	41.4	2.35	7.25	94	407	13	5.17	1.47	1.58	3.56	22.9	64	41.26	35.7	10.79
278	2416	F	51	Control	76	156	58.3	23.8	90	94	82	110	75	7.8	6.65	148	493	74.1	22.3	300	182	33	48	1.5	81.5	46.8	1.35	34.7	9	3.3	5.7	36.7	47	42	27.6	4.13	4.17	52	288	12	5.97	1.01	2.2	3.71	17.6	86	68.31	20.5	15.89
302	9750	F	32	Control	84	157	49	19.9	66	85	62	109	72	3.3	4.86	154	461	94.9	31.7	334	107	22	24	1.1	71.2	42.6	1.49	28.6	10.4	4.7	5.7	45.2	77	15	8.3	3.92	2.76	30	203	18	3.95	0.53	1.82	2	14.8	54	39.49	27.3	14.21
313	9762	M	41	Control	85	160	53	20.7	69	87	73	93	60	5.6	5.42	173	495	91.5	31.9	349	240	27	23	0.9	75.2	45.3	1.52	29.9	6.8	3.8	3	55.9	94	27	10.9	4.97	2.6	52	323	18	4.46	0.9	1.54	2.65	16.4	53	36.55	31	13.36
315	9764	F	43	Control	81	149	46	20.7	61	83	91	105	72	5.6	4.69	156	454	96.8	33.3	344	160	15	24	1.6	71.3	41.8	1.42	29.5	14.9	7.2	7.7	48.3	64	6	9.3	3.33	4.29	46	275	17	4.41	2.5	1.66	2.83	28.3	55	26.88	51.3	14.18
318	9765	F	48	Control	81	159	50	19.8	63	82	78	117	86	4.4	4.72	151	439	93	32	344	132	15	22	1.5	78.6	45.6	1.38	33	12.4	5.2	7.2	41.9	84	12	10.5	5.48	4.71	36	419	18	5.01	0.84	2.33	2.43	14.6	70	55.69	20.8	15.24
321	9768	M	44	Control	80	170	54	18.7	64	84	76	127	79	5	4.77	151	431	90.4	31.7	350	115	28	29	1	69.5	44.6	1.79	24.9	7.2	3.6	3.6	50	143	14	9.2	4.86	3	42	262	20	3.9	0.58	1.5	2.15	13.5	51	37.28	26.6	11.68
332	579	M	39	Control	87	173	61.6	20.7	72	91	51	109	69	5.2	5.04	162	472	93.7	32.1	343	182	18	31	1.7	80.3	48.4	1.52	31.9	7.8	3.1	4.7	39.7	118	25	9.2	3.86	3.72	59	353	21	4.91	1.15	1.6	3.08	17	65	48.28	26	14.32
335	507	M	56	Control	84	149.5	44.5	20	61	88	78	125	85	3.9	4.3	139	407	94.7	32.3	342	164	9	21	2.3	79.1	48.4	1.58	30.7	7.9	2.4	5.5	30.4	126	11	10	3.9	3.65	38	290	18	5.52	0.79	2.15	3.35	20.8	56	34.84	37.4	13.34
338	566	M	49	Control	84	173.5	58	19.2	76	88	68	120	78	7.2	4.75	169	473	99.6	35.6	357	150	24	38	1.6	75.7	47.3	1.67	28.4	9.6	4.1	5.5	42.7	103	67	11.7	4.04	4.06	61	363	21	5.02	0.63	2.1	2.9	17.6	58	40.29	30.4	13.78
361	2395	M	31	Control	84	171	58.8	20.2	71	94	56	130	70	5.1	5.24	164	476	90.8	31.3	345	171	27	31	1.1	75.1	46.2	1.6	28.9	7	2.8	4.2	40	52	32	27.7	3.48	6.83	76	352	18	4.78	0.86	1.79	2.93	24.1	66	41.47	36.8	14.44
367	2394	M	39	Control	85	160	56.3	21.9	73	85	95	121	84	6	5.56	170	496	89.2	30.6	343	186	66	64	1	80.4	47.5	1.44	32.9	8.6	3.6	5	41.9	86	43	23.9	2.75	5.08	74	261	16	5.61	1.14	1.77	3.66	20.8	76	55.32	27.3	11.33
372	9637	F	53	Control	80	154	43	18.1	62	85	69	112	78	3.1	4.81	153	453	94.2	31.8	338	160	17	33	1.9	72.5	40.5	1.27	32	9.5	2.4	7.1	25.3	84	9	11.6	4	4.17	39	318	17	5.87	0.82	1.63	3.68	14.4	50	36.04	28.5	16
378	2894	M	45	Control	84	171.5	58.4	19.6	71	85	110	119	79	5.9	4.72	169	484	102.5	35.8	349	59	42	94	2.2	75.4	45.4	1.51	30	8.8	3.9	4.9	44.3	91	362	12.4	5.01	3.4	62	279	19	4.54	1.53	2.16	2.19	41.3	45	3.49	92.2	12.65
400	9450	F	57	Control	83	158	60	24	76	95	62	138	89	6.4	4.77	156	461	96.6	32.7	338	185	24	31	1.3	78.6	46.6	1.46	32	9.1	3	6.1	33	75	14	12.9	4.94	3.88	39	204	17	7.16	1.04	1.66	4.35	10.5	59	48.5	17.8	14.77
405	9684	F	46	Control	85	152	45	19.5	65	85	88	96	70	8	4.88	155	448	91.8	31.8	346	148	21	29	1.4	79.1	42.8	1.18	36.3	14.5	4.9	9.6	33.8	77	11	13.5	3.49	3.79	53	250	13	4.71	0.89	1.53	2.63	11.3	49	37.96	22.9	18.88
413	9473	F	61	Control	77	164.5	44	16.3	67	88	79	129	91	3.5	4.2	140	411	97.9	33.3	341	149	12	31	2.6	85	38.5	0.83	46.5	10.5	4.1	6.4	39	79	21	15.8	4.88	5.89	62	331	16	4.22	0.63	1.15	2.61	22	60	38.34	36.5	22.5
414	9694	F	45	Control	82	152	52	22.5	63	88	84	100	71	4	4.1	137	398	97.1	33.4	344	114	34	27	0.8	66.8	39.6	1.46	27.2	6.3	3	3.3	47.6	79	11	8.9	6.02	4.59	58	185	25	4.31	1.9	1.52	2.59	3.2	49	45.75	6.5	12.36
415	9437	F	44	Control	86	156	50	20.5	69	84	74	130	89	4.8	4.56	154	444	97.4	33.8	347	188	15	19	1.3	78.3	44.5	1.32	33.8	11.6	3.7	7.9	31.9	55	13	10.9	4.75	5.03	43	251	17	4.86	0.68	1.24	3.23	11.4	71	59.43	16.1	15.74
417	9489	F	45	Control	84	154	60	25.3	74	94	59	104	72	6.6	4.63	152	453	97.8	32.8	336	109	19	31	1.6	74.4	44.7	1.51	29.7	14.9	6.5	8.4	43.6	85	11	6.7	5.15	3.19	63	297	22	5.2	2.16	1.55	3.58	15.4	58	42.44	26.6	15.68
426	9485	M	55	Control	81	170	60	20.8	72	93	77	120	79	5.8	5.01	162	485	96.8	32.3	334	115	23	33	1.4	75.4	47.9	1.74	27.5	12.5	5.2	7.3	41.6	103	12	12.7	5.3	9.71	50	296	17	4.87	0.57	1.89	2.57	29.7	72	42.34	41.2	12.84
427	9469	M	48	Control	79	167	65	23.3	86	92	63	114	79	3.8	4.88	163	480	98.4	33.4	340	171	69	49	0.7	79.3	46.6	1.43	32.7	14.9	6	8.9	40.3	86	96	15.4	4.86	7.58	71	466	20	6.84	1.74	1	5.64	31.9	55	22.75	58.4	13.83
437	9477	F	54	Control	81	151	49	21.5	60	89	71	136	73	3.5	4.68	140	431	92.1	29.9	325	193	27	35	1.3	77.6	42	1.18	35.6	14.1	4.9	9.2	34.8	97	27	11.1	4.78	6.21	60	264	18	5.4	0.71	1.46	3.41	9.8	70	60.51	13.9	15.87
441	9475	M	46	Control	81	173	64	21.4	72	91	69	132	84	5.8	5.27	167	497	94.3	31.7	336	108	22	21	1	86.7	47.3	1.2	39.4	13.4	6.3	7.1	47	193	50	10.1	5.14	5.29	88	402	22	3.51	0.55	0.83	2.55	14.3	41	26.66	34.9	17.94
442	9491	F	43	Control	82	159	58	22.9	63	90	71	113	76	6.3	4.7	142	430	91.5	30.2	330	128	11	18	1.6	76	43.6	1.35	32.4	8.2	3.5	4.7	42.7	63	8	9.9	4.63	4.35	62	231	20	5.39	0.63	2.1	3.06	15.2	63	47.94	24.1	16.43
444	9419	F	50	Control	87	153	50	21.4	68	88	82	123	82	3.7	5.07	155	464	91.5	30.6	334	129	22	32	1.5	70.8	42.5	1.5	28.3	6.5	2.5	4	38.5	94	29	14.3	4.13	3.93	47	225	19	4.71	1.04	1.41	2.81	7.8	51	43.47	15.2	12.52
450	9478	F	43	Control	83	160	55	21.5	63	92	98	134	83	9.1	5.4	151	475	88	28	318	144	19	27	1.4	71.5	41.9	1.42	29.6	16.7	5.3	11.4	31.7	64	12	10.5	5.79	4.41	47	255	13	4.15	0.5	1.65	1.84	19.2	75	55.82	25.6	13.65
451	9462	M	46	Control	87	166	53	19.2	68	87	58	119	75	4.3	5.15	177	524	101.7	34.4	338	106	19	31	1.6	80.5	49.4	1.59	31.1	7.6	4.2	3.4	55.3	133	35	9.4	5.38	4.47	66	465	17	4.03	0.66	1.76	2.21	12.6	56	43.17	22.6	16.82
459	9471	M	30	Control	83	166	56	20.3	73	86	62	135	60	7.6	5.35	175	517	96.6	32.7	338	134	14	21	1.5	62.6	39.7	1.73	22.9	5.7	2.1	3.6	36.8	59	17	12.3	4.34	4.43	56	360	17	4.04	0.79	1.18	2.55	13.7	64	50.29	21.4	9.86
462	9443	M	63	Control	84	163	53	19.9	71	94	90	93	61	6.9	5.77	178	527	91.3	30.8	338	123	22	37	1.7	75.9	45.8	1.42	35.4	23.9	9.4	14.5	39.3	64	28	9.8	4.79	4.09	71	379	18	4.33	0.42	1.74	2.07	24.5	62	37.31	39.6	16.8
505	2682	M	33	Control	88	170.5	57.7	19.8	73	86	80	120	88	10	5.52	172	510	92.4	31.2	337	144	31	36	1.2	80.1	49	1.58	31.1	7	2.9	4.1	41.4	128	90	13.5	4.75	5.69	68	442	20	3.86	1.58	1.41	2.18	40.3	55	14.88	73	13.05
516	9613	F	50	Control	81	154	50	21.1	70	89	65	142	82	5	5.12	156	460	89.8	30.5	339	170	20	32	1.6	68.7	37.6	1.21	31.1	7.6	2.6	5	34.2	113	14	9.8	4.11	4.17	46	230	19	3.83	1.69	1.19	1.96	9	40	31.41	22.3	17.29
517	9611	F	49	Control	78	160	65	25.4	77	96	82	131	88	4.6	5.75	158	488	84.9	27.5	324	140	15	27	1.8	88.7	48.6	1.21	40.1	9.3	3.1	6.2	33.3	112	12	12.6	5.03	6.38	41	231	18	4.94	0.83	1.64	2.49	6	78	71.88	7.7	18.66
520	9617	F	49	Control	86	146	43	20.2	64	84	101	115	77	5	4.91	152	439	89.4	31	346	112	14	19	1.4	70.9	43.3	1.57	27.6	10.2	4.8	5.4	47.1	83	15	6.3	5.33	4.47	43	305	16	4.15	0.96	1.59	1.97	18.8	53	34.09	35.5	12.64
525	9663	F	41	Control	82	158	54	21.6	66	91	67	110	80	3.8	4.46	141	406	91	31.6	347	174	12	21	1.8	72.3	42	1.39	30.3	9.1	3.9	5.2	42.9	65	8	9.4	4.66	3.89	70	293	22	5.12	0.52	1.44	3.41	18.9	63	44.19	30	15.08
535	2732	M	43	Control	80	179.5	68.5	21.3	84	88	51	109	81	5.5	5.62	159	495	88.1	28.3	321	173	13	29	2.2	71.8	42.3	1.43	29.5	9.5	3.8	5.7	40	94	23	11.1	3.17	5.2	70	345	19	2.83	1.04	1.11	1.53	9.7	72	61.85	13.6	13.74
538	2812	F	43	Control	80	151	44.8	19.7	64	86	81	120	79	9.1	5.06	150	446	88.1	29.6	336	251	13	31	2.4	77.8	38.8	0.99	39	10.6	6	4.6	56.6	111	19	10	5.29	3.31	55	272	16	3.98	0.89	1.12	2.65	8.5	58	49.61	14.6	19.69
550	2718	M	61	Control	80	168	61.6	22	75	89	93	123	71	5.8	5.14	176	492	95.7	34.2	358	95	18	27	1.5	74.1	42.1	1.32	32	8.3	3.1	5.2	37.3	102	31	11.4	4.13	2.71	60	318	21	5.66	0.97	2.1	3.37	35.7	47	10.85	76.7	15.27
568	2765	M	40	Control	75	167	58.6	21.2	72	88	80	110	69	3.7	5.25	175	501	95.4	33.3	349	174	54	74	1.4	72.6	40.5	1.26	32.1	14.9	6.3	8.6	42.3	95	93	12.9	3.62	5.52	88	318	24	3.76	0.85	1.95	1.85	40.4	46	6.09	86.9	18.63
620	9124	F	42	Control	80	148	60	27.4	85	95	60	98	70	6	4.56	156	446	97.8	34.2	350	169	20	25	1.3	73.2	43.7	1.48	29.5	10.5	4.5	6	42.9	77	47	8.2	4.38	5.38	59	276	17	3.95	0.45	1.39	2.08	28.2	53	24.92	53.1	17.15
655	9221	M	32	Control	87	168	56	19.8	74	92	52	133	83	5.2	5.41	178	486	89.8	32.9	366	155	22	26	1.2	74.3	46.4	1.66	27.9	7	3.4	3.6	48.6	116	42	15.3	4.58	3.62	63	423	14	4.72	0.44	1.63	2.6	12	56	44.31	21.3	11.79
660	9210	F	47	Control	80	157	65	26.4	81	102	60	140	91	4.5	5.5	154	464	84.4	28	332	231	15	19	1.3	74.2	42.1	1.31	32.1	6.1	3.2	2.9	52.5	53	18	8.4	4.72	2.85	70	269	17	4.4	0.91	1.18	2.68	5.4	67	61.14	8.1	15.37
702	9278	M	42	Control	79	157	40	16.2	63	79	95	92	67	6.6	6.98	156	715	102.4	22.3	218	95	19	26	1.4	76.1	48.6	1.77	27.5	18.2	7.8	10.4	42.9	149	15	19.2	4.26	6.04	75	376	14	4.13	0.8	1.04	2.73	28.7	60	31.74	47.5	10.8
718	9244	F	54	Control	77	156	48	19.7	72	87	61	102	77	3.4	7.2	155	729	101.3	16.9	167	106	14	26	1.9	81.3	44.5	1.21	36.8	42.8	11.9	30.9	27.8	87	21	10.5	4.48	7.38	69	433	13	4.94	0.6	1.64	2.78	41.2	55	13.44	75.4	16.78
722	9186	F	50	Control	79	150	38	16.9	59	84	77	131	91	4.9	4.9	150	422	86.1	30.6	355	200	14	18	1.3	73.9	42.4	1.35	31.5	10.8	5.5	5.3	50.9	95	65	8.7	5.06	5.01	43	307	16	3.75	0.61	1.31	1.94	13.4	44	30.57	30.5	14.57
777	2579	M	36	Control	86	157	55.4	22.3	84	89	96	133	88	6.4	4.95	159	458	92.5	32.1	347	178	43	45	1	78.8	48	1.56	30.8	10.5	5.8	4.7	55.2	94	101	13.3	5.2	6.56	85	446	17	3.78	1.23	2.04	1.67	41.7	70	28.27	59.6	11.12
781	9007	F	40	Control	80	150	46	20.4	64	87	82	97	70	4	4.67	153	433	92.7	32.8	353	143	17	25	1.5	77.2	44.6	1.37	32.6	6	3.4	2.6	56.7	59	11	11.1	4.16	4.95	64	224	14	5.25	0.57	1.62	3.1	27.5	55	27.85	49.7	17.55
785	9179	M	32	Control	86	160	48	18.8	64	84	64	99	71	7	5.06	172	469	92.7	34	367	225	15	26	1.7	71	44.2	1.65	26.8	10.8	6.7	4.1	62	104	34	11.6	4.7	5.43	60	308	14	3.49	0.7	1.01	2.2	8	40	31.94	20	11.84
795	9059	F	40	Control	76	148	44	20.1	67	87	59	120	83	3.9	4.99	152	440	88.2	30.5	345	209	8	16	2	74	45.2	1.57	28.8	17	5.6	11.4	32.9	66	13	9.6	4.37	2.77	66	240	19	4.73	0.55	1.73	2.51	12.3	74	61.49	16.7	14.08
817	9032	F	48	Control	80	146	46	21.6	69	87	76	113	83	4.1	5.53	135	427	77.2	24.4	316	173	16	29	1.8	72	41	1.32	31	6.7	2.9	3.8	43.3	82	28	14.4	5.08	4.56	73	338	13	3.88	0.57	1.31	2.28	4.6	70	65.34	6.6	17.01
821	9014	F	50	Control	84	144.5	47	22.5	74	85	60	132	90	5.8	5	159	458	91.6	31.8	347	200	22	26	1.2	73.9	43.7	1.45	30.2	6.4	2.4	4	37.5	102	25	12.3	3.66	3.54	74	430	15	4.53	1.33	1.37	2.74	23.6	67	43.18	35.3	14.87
828	9001	M	37	Control	81	164.5	48	17.7	64	90	49	114	69	2.9	6.31	177	568	90	28.1	312	87	25	31	1.2	68.7	40.9	1.47	27.8	10.2	5.2	5	51	83	12	11.6	4.37	6.02	81	410	18	3.95	0.59	1.45	2.05	32.3	56	23.65	57.7	14.24
832	592	M	48	Control	79	163	48.7	18.4	67	84	61	99	69	5.3	5.31	179	517	97.4	33.7	346	141	20	35	1.8	80.3	49.6	1.62	30.7	13.6	5.2	8.4	38.2	116	241	11.5	3.02	3.33	55	391	22	5.03	1.04	1.88	3.1	32.8	62	28.94	53.1	12.24
836	9062	F	47	Control	83	149.5	44	19.7	67	87	98	111	78	5.3	5.56	151	497	89.4	27.2	304	276	15	27	1.8	75.9	41.4	1.2	34.5	9.2	2.2	7	23.9	89	26	11.3	4.41	2.3	59	251	10	5.15	0.96	1.82	3.07	34.4	72	37.57	47.8	14.83
843	9708	M	56	Control	79	164	55	20.4	75	86	65	121	78	5.1	5.03	163	467	92.8	32.4	349	171	23	39	1.7	78.3	43.4	1.24	34.9	6.2	2.7	3.5	43.5	105	36	15.8	4.44	4.62	76	384	19	4.83	1.57	1.25	3.13	17.4	46	28.57	37.9	16.32
845	9705	F	44	Control	80	156	45	18.5	76	82	93	117	77	4.6	4.54	133	398	87.7	29.3	334	152	17	23	1.4	74.7	45.4	1.55	29.3	5.4	2.5	2.9	46.3	65	12	9.5	4.79	3.29	47	220	17	4.07	1.17	1.65	1.75	3.9	74	70.05	5.3	13.32
846	9666	F	46	Control	89	147	53	24.5	78	90	69	107	77	7.1	4.85	155	437	90.1	32	355	189	21	25	1.2	71.9	43.8	1.56	28.1	9	3.2	5.8	35.6	73	30	12.3	4.36	4.13	61	341	20	5.29	1.72	1.46	3.39	23.1	59	36.19	39	13.46
859	9704	F	48	Control	78	151	50	21.9	68	90	65	109	77	5.2	4.98	159	465	93.4	31.9	342	151	9	20	2.2	83.6	41.2	0.97	42.4	9.5	4	5.5	42.1	65	10	8.7	4.91	4.06	53	395	19	4.41	2.43	1.51	2.26	15.2	49	33.99	30.9	23.37
877	9665	F	64	Control	80	147	65	30.1	83	105	66	147	87	4.5	4.79	158	448	93.5	33	353	169	23	27	1.2	82	44.9	1.21	37.1	10.8	4.5	6.3	41.7	99	29	20.3	4.49	7.62	51	387	18	4.75	0.76	1.41	2.78	22	57	35.05	38.6	16.82
897	9376	M	44	Control	84	152	46	19.9	72	83	51	99	57	5.3	5.38	174	486	90.3	32.3	358	122	18	25	1.4	70	42.8	1.57	27.2	7.8	3.7	4.1	47.4	84	42	7.8	4.31	3.91	61	373	18	4.21	0.71	1.29	2.48	28.7	47	18.44	60.9	11.71
899	3126	F	59	Control	80	154.5	43.3	17.9	55	85	68	119	79	4.4	5.07	154	463	91.3	30.4	333	152	12	20	1.7	79.4	47	1.45	32.4	7.1	2.8	4.3	39.4	93	13	9.9	2.26	5.29	56	254	23	5.49	0.74	2.14	3.16	13.2	55	41.83	24	15.35
926	9347	M	41	Control	76	171	54	18.5	69	87	81	103	61	4.8	5.87	174	512	87.2	29.6	340	158	13	22	1.7	74.6	45.4	1.55	29.2	5.1	2.8	2.3	54.9	81	27	13.2	4.83	3.56	57	315	20	3.19	0.53	0.97	1.93	3.2	76	73.13	4.2	12.89
948	9322	M	30	Control	81	162	66	25.1	87	90	92	114	81	2.9	7	170	685	97.9	24.3	248	135	49	44	0.9	82.3	50.9	1.62	31.4	32.1	9.8	22.3	30.5	196	45	18.7	4.48	6.36	66	471	23	4.51	0.92	1.28	2.8	46	65	18.93	70.8	11.29
954	9299	M	38	Control	80	159	43	17	63	81	60	117	64	5.6	5.2	171	476	91.5	32.9	359	234	14	19	1.4	68.2	41.3	1.54	26.9	5.4	2.5	2.9	46.3	89	18	12.6	4.5	4.12	50	289	23	4.07	2.08	1.25	2.32	19.6	52	32.19	37.8	10.83
956	3141	F	52	Control	83	148.5	44.4	19.8	64	85	72	120	78	5.6	5.1	159	482	94.5	31.2	330	206	19	35	1.8	87	51.1	1.42	35.9	6.6	2.4	4.2	36.4	102	24	12.2	7.85	5.48	62	229	18	6.25	0.77	1.97	3.94	20.1	56	35.87	35.9	16.47
965	3085	M	33	Control	87	170.5	57	19.5	72	93	107	120	79	6.2	5.32	158	475	89.3	29.7	333	310	26	35	1.3	79.1	44.7	1.3	34.4	17.3	8.9	8.4	51.4	83	104	19.9	3.62	2.49	61	297	21	5.42	3.38	1.33	2.8	34.9	47	11.92	74.5	16.71
970	3104	F	52	Control	80	153	59.4	25.2	79	55	84	129	88	7	4.88	143	437	89.5	29.3	327	147	21	24	1.1	76.9	48.4	1.7	28.5	4.7	1.9	2.8	40.4	140	41	12.1	2.89	6.55	50	376	18	5.41	0.85	1.82	3.27	27	51	23.54	53.4	11.42
972	691	M	41	Control	77	161.5	51.4	19.4	67	84	75	131	82	4.9	5.37	168	505	94	31.3	333	186	31	46	1.5	86.4	51.4	1.47	35	7.1	2.6	4.5	36.6	99	80	8.5	5.4	3.03	55	347	19	5.74	0.61	2.53	3.18	15.6	75	59.63	20.7	14.82
974	3146	M	33	Control	80	164	52	19.3	69	85	79	120	88	7.9	5.38	151	447	83.1	28.1	338	242	22	23	1	79.5	41.9	1.11	37.6	6.3	2.6	3.7	41.3	124	33	14.7	3.62	5.01	67	293	20	2.77	0.54	1.28	1.33	5.7	52	46.6	10.9	14.93
976	3135	M	40	Control	85	163	59.1	22.2	68	84	58	120	83	6.7	5.44	178	507	93.2	32.7	351	191	20	39	2	78.4	48.1	1.59	30.3	9.1	4	5.1	44	88	41	13.2	3.22	5.04	63	467	21	4.39	1.04	1.69	2.42	24.9	63	38.55	39.2	12.68
983	2904	M	34	Control	87	163	56.6	21.5	76	85	66	110	88	5	5.06	158	464	91.7	31.2	341	136	19	32	1.7	82.6	48.6	1.43	34	4.5	2.6	1.9	57.8	89	31	11.1	4.18	5.06	76	340	23	4.06	1.18	1.31	2.52	20.7	62	41.07	33.5	16.9
984	3088	F	45	Control	85	153	57.8	24.8	72	95	90	139	78	6.8	5.32	145	446	83.8	27.3	325	209	18	27	1.5	84.9	50	1.43	34.9	6.2	2.6	3.6	41.9	87	23	10.8	2.88	4.41	59	307	18	4.54	1.03	1.31	2.83	20.7	61	40.06	34.1	15.61
986	3145	F	50	Control	81	149	41	18.5	61	82	78	119	78	5.5	4.58	138	424	92.6	30.1	325	150	10	24	2.4	71.9	44.5	1.62	27.4	7.3	2.1	5.2	28.8	85	25	10.6	2.77	3.02	67	202	20	5.7	0.86	2.56	3.12	17.7	46	28.04	38.7	11.11
990	2938	F	46	Control	82	158	55.2	22	66	93	61	107	92	7.9	5.07	159	481	94.9	31.4	331	188	11	25	2.3	78.8	46	1.4	32.8	4.2	1.5	2.7	35.7	86	12	8.6	6.34	3.92	58	210	19	4.24	1.45	1.61	2.23	17	58	41.15	29.2	14.09
991	2900	M	33	Control	86	170.5	52	17.8	70	80	54	110	80	5.8	5.16	167	483	93.6	32.4	346	125	20	20	1	73.9	48.7	1.93	25.2	4.6	2.9	1.7	63	154	21	11.3	3.98	4.25	71	333	17	2.96	0.9	1.38	1.47	16	48	32.15	33.2	11.32
1014	2921	M	35	Control	83	157.5	52.6	21.2	72	84	54	101	73	4.5	5.01	167	483	96.4	33.3	346	163	35	35	1	72.2	49.1	2.13	23.1	7.3	3.7	3.6	50.7	86	73	9.5	7.38	4.62	77	350	23	3.35	1.02	1.44	1.68	28	59	31.33	47.2	9.49
1016	2944	M	32	Control	84	163	73.5	27.9	93	96	75	130	79	4	4.77	175	486	101.9	36.7	360	162	115	113	1	82.1	49.5	1.52	32.6	15.2	8	7.2	52.6	130	1197	10.3	3.31	5.88	96	598	17	6.9	3.13	1.56	4.47	36.1	71	35.15	50.7	11.23
1034	2967	M	32	Control	85	174.6	68.7	22.5	85	93	58	120	80	5.9	5.6	169	511	91.3	30.2	331	143	22	28	1.3	81.6	51.6	1.72	30	7.4	4.4	3	59.5	127	36	20.1	2.56	4.51	80	389	17	4.56	0.83	1.35	2.84	17.8	57	38.72	31.5	12.82
1037	3019	M	47	Control	86	164	55.3	20.4	79	86	84	119	78	5.8	4.78	168	467	97.7	35.1	360	141	24	37	1.5	81.6	46.8	1.34	34.8	5.8	2.3	3.5	39.7	115	49	14.4	3.46	3.71	87	413	17	4.4	0.8	2.19	2.12	22.3	59	36.2	38.1	14.84
1040	2958	M	46	Control	76	165	63.9	23.5	85	90	73	129	82	6.3	4.44	169	460	103.6	38.1	367	55	30	118	3.9	86.4	47.3	1.21	39.1	16.9	10.3	6.6	60.9	103	874	18.4	5.64	1.9	49	294	19	5.87	0.63	2.86	2.97	37.2	54	16.83	68.9	18.89
1048	3072	M	39	Control	80	168.5	56.9	20	67	88	63	109	79	8.1	5.05	157	472	93.5	31.1	333	131	26	29	1.1	80.6	48.6	1.52	32	8.5	3.5	5	41.2	109	27	21.8	2.93	3.66	75	151	20	5.1	0.64	1.71	3.19	25.2	55	29.41	46.1	13.91
1054	3031	F	40	Control	85	152.5	48	20.5	66	86	84	111	83	5.6	4.78	131	406	84.9	27.4	323	191	11	21	1.9	84.2	46.5	1.23	37.7	4.8	1.4	3.4	29.2	112	41	11.5	3.97	6.3	62	321	17	5.08	0.56	1.99	2.93	5.1	91	85.48	5.6	18.21
1080	2952	M	66	Control	85	156.5	45.1	18.3	65	81	86	131	81	10.5	5.23	167	488	93.3	31.9	342	56	15	23	1.5	67.6	41	1.54	26.6	3.2	1	2.2	31.3	89	20	13.2	2.79	4.22	65	453	17	5.58	0.94	1.64	3.44	19.2	47	28.21	40.5	11.73
1083	3057	M	49	Control	79	164	58.8	21.9	79	90	92	136	86	6.3	4.73	165	484	102.3	34.9	341	128	41	51	1.2	76.6	45.2	1.44	31.4	13.9	7.4	6.5	53.2	67	218	14.6	3.09	3.17	46	311	17	4.43	0.62	2.23	2.02	25.7	54	27.91	47.9	13.62
1093	3045	M	53	Control	84	152.5	45.2	19.2	67	85	93	114	88	5.6	5.7	170	506	88.8	29.8	336	270	11	29	2.6	82.9	48.3	1.4	34.6	18.8	8.1	10.7	43.1	71	25	11.9	4.62	2.27	41	360	14	4.7	0.95	2.03	2.46	29.9	52	22.01	57.6	16.24
1106	3024	M	37	Control	81	161.5	51.5	19.8	63	79	85	110	79	9.2	5.48	165	489	89.2	30.1	337	272	16	28	1.8	70.2	38.6	1.22	31.6	7.6	3.3	4.3	43.4	110	30	10.4	5.06	2.28	53	223	19	2.71	0.61	0.83	1.51	4	44	40.26	9	11.74
1111	3076	F	48	Control	82	149	43.6	19.8	60	81	60	129	79	4.4	4.97	152	460	92.6	30.6	330	164	21	26	1.2	81.8	48	1.42	33.8	9	3.6	5.4	40	88	24	8.3	2.95	5.8	56	232	20	6.04	0.99	1.92	3.79	15.2	59	43.95	25.7	13.88
1117	1166	M	47	Control	85	158	56.9	22.8	79	86	73	129	89	6.4	5.08	162	490	96.5	31.9	331	76	20	27	1.4	82.8	47.7	1.36	35.1	13.5	4.6	8.9	34.1	90	32	18	2.96	5.55	77	371	23	4.03	0.79	1.91	1.86	11	60	48.8	18.4	15.79
1125	3245	M	34	Control	87	164	59.5	22.3	80	89	60	110	70	7	4.87	175	506	103.9	35.9	346	193	34	32	0.9	75.5	46.4	1.59	29.1	9	4.1	4.9	45.6	127	83	10.5	2.49	4.18	88	423	21	6.33	2.15	2.09	4.05	37.5	66	28.86	56.5	10.09
1138	3221	M	34	Control	90	164	71.2	26.4	96	96	69	119	88	5.2	5.56	179	524	94.2	32.2	342	109	38	34	0.9	70.4	47.2	2.03	23.2	11	4.8	6.2	43.6	141	51	10.8	2.89	3.98	105	383	18	4.5	2.06	1.56	2.76	14.9	55	40.3	27	8.74
1152	2586	M	38	Control	83	157.5	55	22	80	88	91	113	81	6.8	5.36	173	503	93.8	32.3	344	269	64	56	0.9	83.3	53	1.75	30.3	11.8	4.2	7.6	35.6	105	165	11.2	4.23	4.89	72	449	20	6.17	1.46	1.2	4.23	20.6	67	46.27	30.8	12.45
1162	2536	M	40	Control	80	164	71.3	26.4	90	103	66	110	88	4.3	5.34	168	498	93.3	31.5	337	161	28	38	1.4	83.4	49.2	1.44	34.2	12.4	6.3	6.1	50.8	88	62	12.1	3.83	6.44	96	425	21	4.71	0.85	1.54	2.86	21.7	53	31.71	40.6	15.91
1172	941	M	31	Control	84	164.5	47.7	17.6	69	84	73	111	80	6.7	5.81	178	536	92.3	30.6	332	142	24	28	1.2	76.1	45.4	1.48	30.7	11.4	6.5	4.9	57	102	27	9.2	4.81	4.52	74	345	16	3.5	0.66	1.51	1.98	51.8	66	13.9	78.8	12.24
1209	3020	M	38	Control	79	168.5	57.6	20.3	68	87	54	128	78	4.8	5.54	174	524	94.6	31.4	332	185	21	45	2.1	75.7	49.4	1.88	26.3	14.1	6.5	7.6	46.1	104	112	19.3	4.25	5.64	60	355	20	4.53	0.7	2.38	2.07	24.2	57	32.54	42.7	11.73
1217	2585	M	35	Control	89	165.5	55	20	78	88	75	108	81	6.4	5.52	165	487	88.2	29.9	339	159	20	33	1.7	80.1	47.1	1.43	33	6.2	2.7	3.5	43.5	115	67	11.3	5.52	5.51	78	398	21	6.47	1.22	1.53	4.45	16.8	58	41.08	29	14.68
1218	2578	M	34	Control	88	163.5	64.5	24.2	89	92	74	130	78	7.3	5.17	176	498	96.3	34	353	180	35	51	1.5	77.5	46.9	1.53	30.6	10.9	4.3	6.6	39.4	82	164	17.1	2.71	5.44	66	520	17	6.05	1.68	1.7	3.8	29.1	73	43.56	40	10.95
1221	2589	M	44	Control	78	155	47.1	19.6	66	84	66	105	75	6.3	5.19	166	473	91.1	32	351	206	27	42	1.6	82.3	50.5	1.59	31.8	13.3	5.7	7.6	42.9	123	34	18.5	4.27	3.52	55	518	18	3.8	0.74	1.63	2	9.7	74	64.18	13.1	11.26
1229	696	M	45	Control	86	160	45.7	18	65	82	63	128	88	5.5	4.42	161	455	102.9	36.4	354	182	14	39	2.8	80.8	50.1	1.63	30.7	9.6	3.2	6.4	33.3	58	74	10.6	5.23	4.85	51	270	18	5.07	0.82	2.03	2.72	20.8	67	45.99	31.1	10.08
1232	630	F	44	Control	80	153	47	20.1	63	80	75	111	84	4.2	5.11	155	475	93	30.3	326	113	7	31	4.4	80	45.5	1.32	34.5	6.6	2	4.6	30.3	86	15	7.3	3.22	4.21	52	238	23	4.6	0.66	2.16	2.45	21.2	64	42.89	33.1	15.98
1238	2698	M	52	Control	80	165	54.9	20.2	71	89	73	127	88	5.3	5.34	172	490	91.8	32.2	351	140	12	25	2.1	76.7	47.1	1.59	29.6	7.1	3	4.1	42.3	83	46	11.5	3.55	3.83	88	416	22	5.43	1.54	1.32	3.68	13.1	58	45.14	22.5	10.88
1243	3295	M	49	Control	82	162	64.5	24.8	90	93	86	130	88	7.2	5.41	174	520	96.1	32.2	335	92	90	56	0.6	81	50	1.61	31	7.6	3.5	4.1	46.1	101	155	15.8	4.11	5.53	86	440	19	7.01	2.59	1.6	5.01	16.4	58	41.89	28.1	9.64
1270	2689	M	33	Control	85	168.2	67.4	23.7	88		66	126	88	7.5	6.06	178	527	87	29.4	338	118	17	21	1.2	66.6	43.7	1.91	22.9	9.4	4	5.4	42.6	102	24	12.1	2.8	2.77	82	349	25	4.62	1.28	1.04	3.18	11	48	36.68	23.1	9.04
1272	706	F	55	Control	82	154	51	21.5	64	87	61	102	80	3.7	4.87	145	437	89.7	29.8	332	113	5	19	3.8	76.6	45.2	1.44	31.4	10.2	4.3	5.9	42.2	84	22	7.9	4.7	3.67	59	241	18	3.87	0.83	1.81	2.04	16.9	58	41.11	29.1	12.95
1287	2275	M	49	Control	82	162.5	52.8	19.9	67	86	93	114	72	7.6	4.99	174	505	101.2	34.9	345	146	24	36	1.5	77.6	47.2	1.55	30.4	14.1	5.3	8.8	37.6	79	36	19.7	4.7	4.12	87	475	10	3.98	0.84	2.21	1.98	36	54	18.19	66.4	13.34
1297	2338	M	56	Control	71	163.5	51.8	19.3	73	85	91	111	67	8.8	4.95	174	509	102.8	35.2	342	162	56	95	1.7	81.5	44.8	1.22	36.7	20.3	10	10.3	49.3	119	553	21.9	2.86	2.05	44	262	13	3.6	0.63	1.73	1.81	24.3	56	31.75	43.4	17.8
1306	542	M	36	Control	80	166.5	63.7	22.9	78	88	69	120	85	4	5.42	176	515	95	32.5	342	117	18	31	1.7	76.1	46.6	1.58	29.5	13.6	5.7	7.9	41.9	103	44	9.5	3.56	3.63	73	387	22	4.32	0.76	1.79	2.51	45.5	64	18.1	71.5	11.81
1322	970	M	48	Control	81	154.5	48	20	64	81	75	111	69	4.6	5.32	178	517	97.2	33.5	344	97	42	51	1.2	76.2	45.3	1.47	30.9	17.9	8.4	9.5	46.9	102	81	9	6.8	3.46	57	318	27	6.16	1.09	2.69	3.37	29.7	56	25.9	53.4	13.89
1333	2293	M	38	Control	83	167.5	49.2	17.4	65	85	96	100	80	5.6	5.17	175	532	102.9	33.8	329	96	30	22	0.7	77.1	55.2	2.52	21.9	17.3	6.1	11.2	35.3	57	19	23.6	3.8	6.5	115	434	18	4.23	1.26	1.28	2.64	12.6	59	46.02	21.5	8.67
1365	2285	M	33	Control	92	169	54	18.9	75	85	72	100	72	7.1	5.75	176	520	90.4	30.6	338	177	18	21	1.2	80.2	53.7	2.03	26.5	16	5	11	31.3	91	23	19.1	2.96	5.38	75	351	15	4.31	0.6	1.69	2.59	34.7	68	33.33	51	12.51
1370	2038	M	44	Control	85	164	81.3	30.1	104	97	102	137	85	7.1	4.85	149	449	92.6	30.7	332	163	72	47	0.7	81.2	47.5	1.41	33.7	11.1	4.5	6.6	40.5	63	305	24.8	7.85	4.97	81	420	18	5.94	2.43	1.52	3.54	19.2	62	43.15	30.8	12.26
1372	787	F	48	Control	83	155	47.9	20	63	85	84	102	68	4.2	4.48	134	429	95.8	29.9	312	115	18	26	1.4	82.8	49.1	1.46	33.7	12.9	4.5	8.4	34.9	82	33	11.3	4.13	3.4	69	207	24	4.77	0.78	1.89	2.49	20.4	72	51.63	28.3	14.92
1375	2041	M	37	Control	85	169.5	53.8	18.7	65	86	78	111	83	4.4	5.46	173	520	95.2	31.7	333	234	47	39	0.8	85.3	53.6	1.69	31.7	21.8	5.4	16.4	24.8	108	30	24.3	2.77	3.76	78	377	22	5.41	1.44	1.92	2.83	40.2	70	29.98	57.3	11.01
1379	760	M	35	Control	85	164	49.5	18.6	68	88	93	125	81	5.9	5.27	158	475	90.1	30	333	193	19	27	1.4	72.6	46	1.73	26.6	6.3	2.7	3.6	42.9	124	26	21.5	3.48	8.52	110	594	20	5.31	0.62	2.5	3.14	11.1	71	59.41	15.7	10.91
1385	2100	F	53	Control	85	152.5	43.8	18.8	61	77	91	122	70	5.5	4.99	157	482	96.6	31.5	326	124	24	33	1.4	77.4	44.4	1.35	33	11.1	4.2	6.9	37.8	104	23	14.7	1.88	4.8	63	251	18	5.07	0.8	1.95	2.65	26.4	67	40.2	39.6	14.65
1388	738	F	44	Control	82	150.4	65	28.9	60	80	81	114	74	4.6	4.74	157	468	98.7	33.1	335	187	24	26	1.1	75.9	47.6	1.68	28.3	7.7	3	4.7	39	85	19	12.3	2.86	3.41	65	229	17	5.22	0.95	2.37	2.66	16.5	76	59.99	21.6	11.43
1390	983	M	48	Control	79	152	41.3	17.7	65	74	104	103	65	6.9	4.29	156	473	96.1	31.7	330	64	42	66	1.6	78.3	47.3	1.53	31	22.5	9.3	13.2	41.3	110	117	18.9	2.23	5.39	71	328	24	3.71	0.85	2.34	1.4	49.8	67	17.63	73.9	14.38
1404	747	F	50	Control	85	155.5	49.1	20.1	59	87	62	110	77	6	5.07	151	476	93.9	29.8	317	226	26	25	1	84.7	45.7	1.17	39	12.7	4.7	8	37	74	49	12.8	2.35	5.04	57	231	19	5.18	0.72	2.7	2.4	24.9	60	34.83	41.7	20.29
1409	2062	M	35	Control	88	162	62.8	24	80	91	85	128	84	5.4	5.68	173	516	90.8	30.5	335	176	70	45	0.6	77.2	47.5	1.6	29.7	15.6	4.6	11	29.5	92	203	18.8	2.52	3.41	77	462	25	4.55	2.45	1.17	2.53	33.2	58	24.81	57.2	11.04
1410	704	F	37	Control	82	149	51.3	23	68	89	95	112	68	4	5.05	126	405	80.2	25	311	119	43	42	1	74	45.8	1.62	28.2	15.6	7.1	8.5	45.5	100	21	11	2.9	5.46	52	221	19	3.72	0.62	1.99	1.59	7	92	84.52	7.6	11.93
1412	2053	M	37	Control	88	160	68.7	27	84	95	88	122	87	4	5.23	161	485	92.6	30.7	332	109	56	44	0.8	81	47.9	1.45	33.1	14	5.2	8.8	37.1	164	57	22.6	2.1	6.19	83	460	14	5.69	2	1.63	3.1	39.6	68	28.25	58.4	13.52
1415	752	M	47	Control	83	159	51	20.2	64	81	72	115	83	7.5	5.38	168	513	95.4	31.2	327	134	27	45	1.7	84.8	49.5	1.4	35.3	10	4.9	5.1	49	71	30	13.9	2.75	5.32	82	313	17	4.89	0.89	1.95	2.54	31.1	68	37.15	45.6	16.95
1420	2063	F	42	Control	86	148	58	26.5	79	92	69	117	79	4.1	4.27	142	431	100.9	33.3	329	227	18	25	1.4	76.9	46.1	1.5	30.8	9.5	3.1	6.4	32.6	110	27	15.4	3.14	4.25	50	288	21	5.17	0.7	2.07	2.65	27.6	53	25.57	51.9	13.23
1427	2081	F	48	Control	85	150	59	26.2	74	96	61	140	83	4.5	4.69	151	461	98.3	32.2	328	174	34	32	0.9	80.3	44.5	1.24	35.8	8.5	3.5	5	41.2	99	10	15.8	2.68	6.15	68	296	20	4.51	1.05	1.51	2.46	21.3	81	59.35	26.4	15.6
1435	366	F	45	Control	86	146	36.6	17.4	53	76	77	122	82	4.2	4.85	140	446	92	28.9	314	148	15	41	2.7	84.4	49.6	1.43	34.8	8.4	4.5	3.9	53.6	129	18	14.6	3.34	5.06	58	207	27	5.06	0.73	1.99	2.9	15.3	65	49.98	23.4	16.28
1439	3122	M	53	Control	86	158.5	44.4	17.4	62	79	76	120	88	4.6	5	176	509	101.8	35.2	346	152	19	41	2.2	80.4	49.1	1.57	31.3	6.1	2.7	3.4	44.3	83	40	17.7	2.49	6.02	59	334	20	4.34	0.73	2.22	1.98	14.7	59	44.22	24.9	14.1
1444	54	M	61	Control	86	159	50	19.8	70	88	75	133	80	5.5	4.49	157	451	100.4	35	348	150	17	33	1.9	81.8	47.2	1.36	34.6	13.1	4.7	8.4	35.9	115	53	17.4	2.67	3.89	60	429	25	4.73	0.5	2.41	2.22	21.5	54	32.42	39.9	14.05
1451	74	M	54	Control	79	164	56	20.8	75	95	79	105	68	3.1	3.86	131	399	103.4	33.9	328	172	17	43	2.5	70.6	41.9	1.46	28.7	9.4	3.3	6.1	35.1	58	27	12.3	2.67	3.38	52	399	24	3.11	0.46	1.82	1.3	6.8	47	40.45	14.4	12.05
1454	410	M	34	Control	84	155.5	47	19.3	63	79	87	99	64	3.2	4.4	144	434	98.6	32.7	332	122	15	23	1.5	65.2	42.5	1.87	22.7	5.8	3.1	2.7	53.4	111	19	10.8	3.62	3.42	69	395	19	4.25	0.76	1.04	2.58	13.8	37	23.64	36.9	9.82
1458	82	M	52	Control	78	161	49	18.9	70	84	61	114	80	5.7	4.83	162	482	99.8	33.5	336	81	25	32	1.3	81.2	45.6	1.28	35.6	9.4	4.1	5.3	43.6	99	73	17.4	2.77	3.44	69	409	21	4.88	0.92	2.18	2.67	18.1	57	39.15	31.6	16.44
1459	2987	F	47	Control	89	153.5	49.4	20.7	66	87	60	110	79	6.4	4.47	144	429	96	32.2	336	156	41	26	0.6	72.6	44.6	1.59	28	5.7	2.1	3.6	36.8	75	33	10.5	3.4	4.37	67	312	20	3.13	1.32	1.3	1.42	21.7	58	36.66	37.2	12.79
1461	470	M	35	Control	87	163	48.3	18.1	64	82	93	120	78	4.9	5.48	178	543	99.1	32.5	328	130	62	58	0.9	83	50.6	1.56	32.4	7.3	2.8	4.5	38.4	102	194	16.6	3.28	5.63	70	368	21	5.75	0.95	2.55	2.8	21	53	31.84	39.7	14.52
1464	372	M	33	Control	85	158	50	20	66	83	76	111	66	5.1	4.67	148	455	97.4	31.7	325	119	42	64	1.5	74.7	46.4	1.64	28.3	11.8	5.8	6	49.2	110	41	12.9	4.7	5.47	67	265	20	4.19	1.13	1.98	1.86	21.9	53	30.71	41.6	11.89
1468	358	M	37	Control	77	167.5	45.5	16.3	69	76	83	105	69	8.3	5.78	146	468	81	25.3	312	485	23	24	1	77.8	37.7	0.94	40.1	5.7	3.2	2.5	56.1	203	179	13.9	3.46	2.94	52	259	19	3.61	0.86	1.24	1.86	3.6	39	35.23	9.3	15.13
1474	1136	M	41	Control	82	160.5	50.8	19.7	68	86	79	87	67	5.4	5.8	173	542	93.4	29.8	319	64	23	34	1.5	79.1	48	1.54	31.1	19	9.6	9.4	50.5	92	14	17.4	2.95	6.11	81	432	22	2.8	0.5	1.25	1.31	13.4	69	55.42	19.5	15.19
1487	1116	M	33	Control	92	160	49.4	19.1	65	86	71	106	77	5.4	4.67	176	514	90.7	31	342	149	15	25	1.7	76	50.5	1.98	25.5	14	6.5	7.5	46.4	87	22	17.3	3.09	4.04	76	348	21	4.23	1.41	1.48	2.17	23	55	32.05	41.8	9.58
1488	992	M	47	Control	79	156	50.9	21	74	83	104	128	85	7.3	4.81	165	480	99.8	34.3	344	161	21	24	1.1	78.3	47.9	1.58	30.4	6	2.6	3.4	43.3	103	93	16.3	2.88	2.74	67	490	19	4.39	1.69	2.21	1.84	32.5	55	22.18	59.4	12.9
1497	1030	F	43	Control	81	154	48.5	20.7	64	94	68	100	61	4.7	4.71	146	446	94.7	31	327	104	39	42	1.1	72.1	43.3	1.5	28.8	13.6	5.7	7.9	41.9	83	16	11.3	2.32	4.89	62	239	20	4.3	0.92	1.86	2.29	25.9	59	32.87	44.1	13.22
1505	456	F	44	Control	84	150	43.5	19.6	61	84	78	115	84	6.1	4.92	154	472	95.9	31.3	326	174	15	18	1.2	78.5	48	1.57	30.5	10.9	3.8	7.1	34.9	72	18	12.9	3.75	4.43	63	225	22	5.55	1	2.11	2.99	14.2	62	48.25	22.7	13.43
1512	1150	F	42	Control	82	154	44.2	18.6	60	80	93	106	64	6.4	4.83	138	440	91.1	28.6	314	137	20	40	2	77	46	1.48	31	6.9	2.4	4.5	34.8	63	16	13.3	3.62	5.41	63	339	20	4.32	0.81	1.9	2.3	9.1	77	67.42	11.9	12.36
1514	960	F	62	Control	83	148.6	42	18.9	64	82.1	63	120	70	3.8	5.14	152	478	93	29.6	318	159	22	29	1.3	80.6	45.4	1.29	35.2	8.2	5.1	3.1	62.2	55	23	14.9	2.91	5.44	61	263	19	3.6	0.71	1.38	2.19	21.2	59	37.64	36	17.21
1515	341	F	34	Control	85	151	51	22.4	65	88	78	113	77	4.4	4.75	152	455	95.8	32	334	162	26	23	0.9	72.2	42.4	1.42	29.8	7.6	2.6	5	34.2	68	14	13.7	3.12	5.32	47	209	19	4.95	1.03	1.88	2.62	23.5	60	36.18	39.4	13.77
1520	335	M	30	Control	84	162	64	24.4	79	90	80	125	82	8.4	5.56	175	516	92.8	31.5	339	95	29	28	1	76.5	49.5	1.83	27	7	3.2	3.8	45.7	81	92	14.3	3.4	2.96	75	373	18	4.86	1.4	1.73	2.98	29.7	62	31.97	48.2	12.04
1525	187	M	52	Control	76	165	62	22.8	76	89	79	117	75	7.1	6.42	142	491	76.5	22.1	289	53	16	26	1.6	71.4	44.4	1.64	27	12.2	5.4	6.8	44.3	79	15	15.6	1.74	4.07	66	351	23	3.36	0.39	1.61	1.59	4.6	70	65.04	6.6	11.89
1528	391	M	62	Control	83	158.5	56	22.2	82	79	75	143	81	5.3	5.39	168	505	93.7	31.2	333	125	9	36	4	82.2	44.6	1.19	37.6	11.3	7.5	3.8	66.4	76	53	14.3	3.76	4.17	62	316	21	4.25	1.6	1.88	2.21	21.7	50	28.15	43.5	17.5
1531	346	M	32	Control	83	165.5	53	19.2	68	68	91	109	69	5.9	5.19	154	471	90.8	29.7	327	114	20	33	1.7	72.6	51.3	2.41	21.3	15.6	7.1	8.5	45.5	95	36	11.6	2.86	3.78	66	392	20	3.69	0.85	1.3	2.37	25.4	48	22.32	53.2	9.39
1535	2464	M	47	Control	83	162.5	62.6	23.7	85	93	55	122	81	6.2	5.09	168	502	98.6	33	335	114	25	39	1.6	76.2	45.3	1.47	30.9	10.4	3.7	6.7	35.6	64	55	18.1	5.34	4.72	61	318	11	5.12	0.94	1.84	3.23	25.5	74	48.06	34.7	11.04
1547	484	F	47	Control	88	152	58	25.1	78	93	79	120	87	6.3	4.85	141	434	89.5	29.1	325	293	49	34	0.7	73.8	43.1	1.4	30.7	6.8	2.6	4.2	38.2	158	168	13.2	3.26	2.79	66	368	18	4.23	1.94	1.06	2.29	14	52	38.09	26.9	14.23
1551	276	M	36	Control	85	165	55	20.2	72	24	69	101	69	4.9	5.12	170	512	100	33.2	332	104	23	29	1.3	75.7	46.8	1.62	28.9	11.6	5.5	6.1	47.4	92	16	17.7	5.29	3.82	74	369	20	2.7	0.68	1.21	1.26	20	50	29.91	40.1	12.53
1555	261	F	36	Control	85	151.5	43.5	19	62	86	63	112	71	5	4.74	150	443	93.5	31.6	339	161	18	21	1.2	80.1	46.5	1.38	33.6	3.6	0.9	2.7	25	87	37	12.9	2.36	4.48	58	238	19	4.31	0.95	1.65	2.23	13.1	67	54.06	19.5	15.93
1559	1166	M	64	Control	83	162	64.6	24.8	88	94	71	124	86	5.1	5.16	164	494	95.7	31.8	332	152	25	27	1.1	77.9	47.9	1.6	30	22	8	14	36.4	69	97	17.4	2.89	3.65	79	441	22	6.34	2.12	1.62	3.65	22.4	60	37.22	37.6	10.98
1560	281	M	37	Control	87	162	52	19.8	70	78	74	131	75	5	5.96	178	540	90.6	29.9	330	164	36	44	1.2	90.8	53.2	1.41	37.6	6.6	2.1	4.5	31.8	93	81	17.7	4.68	4.77	66	386	23	6.62	1.79	3.16	3.02	19.1	69	50.26	27.5	17.25
1600	714	F	42	Control	86	153.5	47.9	20.2	63	29	94	126	86	5.5	4.94	151	452	91.5	30.6	334	226	13	21	1.6	79.1	47.6	1.51	31.5	12.2	5.2	7	42.6	64	26	12.5	2.96	3.79	52	210	18	5.3	0.88	1.8	3.3	29.7	74	44.02	40.3	12.1
1601	2109	M	52	Control	84	165.5	82.3	29.8	98	101	72	142	85	4.7	5.29	179	533	100.8	33.8	336	59	108	2	0	76.3	42.3	1.24	34	15.5	4.8	10.7	31	63	3	1.1	3.8	3.47	75	383	12	4.63	1.42	1.19	2.94	21.5	64	42.9	33.4	9.63
1637	2159	F	52	Control	80	155	49.4	20.4	63	86	88	98	77	6	5.45	157	489	89.7	28.8	321	141	28	36	1.3	77.9	45	1.37	32.9	7.1	2.9	4.2	40.8	91	18	17.1	3.02	5.05	66	257	16	4.23	0.54	1.77	2.35	17.9	58	40.24	30.8	14.37
1643	2135	M	34	Control	82	162.5	69.2	26	85	97	62	113	84	4.8	5.7	178	539	94.6	31.2	330	125	56	37	0.7	81.2	49.9	1.59	31.3	12	3.9	8.1	32.5	89	34	15.7	4.2	4.6	74	434	21	4.12	1.47	1.44	2.39	29.9	62	31.84	48.4	13.17
1653	2126	M	34	Control	87	181	67.1	20.5	78	91	35	126	82	5.9	5.24	169	507	96.8	32.3	333	98	29	37	1.3	75.5	48.5	1.8	27	13.5	6	7.5	44.4	105	41	16.6	2.13	5.06	92	322	19	4.47	1.87	1.72	2.47	43.2	65	21.71	66.6	9.99
1656	2235	M	47	Control	73	164	54.6	20.4	79	83	93	109	72	5.1	4.4	169	476	108.2	38.4	355	91	44	98	2.2	86.2	45.9	1.14	40.3	21.6	12.5	9.1	57.9	125	1535	27.1	5.23	2.41	71	341	15	4.17	1.02	1.61	2.24	45.6	47	1.69	96.4	19.94
1657	2130	M	40	Control	84	169.6	77.8	27	91	100	34	99	74	5.5	5.62	173	517	92	30.8	335	148	67	44	0.7	73.2	48.3	1.94	24.9	16.1	5.1	11	31.7	102	36	19.2	4.2	6.05	86	475	17	4.88	0.85	1.35	3.33	31.8	66	34.04	48.3	11.53
1668	2224	M	39	Control	88	172	82.2	27.7	97	94	74	115	72	6	5.63	164	500	89	29.1	328	132	70	56	0.8	84.9	52.2	1.6	32.7	10.9	4.3	6.6	39.4	134	79	29	2.54	5.74	91	547	16	5.18	1.77	1.74	2.71	20.2	74	53.34	27.5	12.2
1690	825	F	53	Control	82	149	49.9	22.5	68	88	64	122	75	7	5.2	158	490	94.2	30.4	322	120	58	43	0.7	85.7	50.2	1.41	35.5	8.3	2.1	6.2	25.3	132	27	15.6	3.2	4.97	59	195	20	5.59	0.84	2.3	3.05	26	63	37.09	41.2	14.82
1700	2104	M	39	Control	87	166.5	45.4	16.1	63	81	103	102	69	5.5	5.29	175	506	95.7	33.1	346	109	16	34	2.1	76.5	43.1	1.29	33.4	14.2	5.6	8.6	39.4	153	33	19.4	3.21	1.95	46	327	18	4.51	1.23	1.21	2.89	19.8	60	40.02	33.1	14.98
1715	966	M	37	Control	88	163.5	49.2	18.2	67	85	75	101	70	5.3	5	161	473	94.6	32.2	340	227	20	29	1.5	76.1	46.3	1.55	29.8	8.2	3.4	4.8	41.5	105	24	7.4	5.3	3.35	63	337	19	4.54	1.24	1.45	2.73	15.1	53	37.6	28.7	12.92
1716	994	F	48	Control	87	160	56	21.9	73	90	64	120	88	7.1	5.42	152	470	86.7	28	323	193	10	18	1.8	82.5	44.4	1.17	38.1	8.2	3.4	4.8	41.5	73	28	9.5	3.59	3.51	68	244	23	3.39	0.78	1.64	1.8	7.9	66	58.05	12	17.84
1717	2668	M	41	Control	84	170	57.9	20.1	74	88	85	129	88	4.1	5.1	163	487	95.5	32	335	108	51	42	0.8	72	46.9	1.87	25.1	8	3.7	4.3	46.3	86	52	8.6	4.3	4.5	51	342	16	4.34	0.63	1.48	2.71	15.3	50	35.09	30.4	10.68
1723	876	M	31	Control	90	162	52.7	20.2	70	82	56	110	82	8	5.25	170	506	96.4	32.4	336	119	36	33	0.9	75.9	47.5	1.67	28.4	7.6	3.2	4.4	42.1	104	33	10.9	4.8	5.68	65	373	17	4.49	0.81	1.86	2.48	20.5	60	39.94	33.9	10.97
1733	2622	M	37	Control	87	166	65.3	23.6	90	90	60	131	87	5.9	5.21	177	504	96.7	34	351	173	99	87	0.9	67.7	44.9	1.97	22.8	18.7	6.2	12.5	33.2	129	360	9.7	4.02	4.81	73	311	18	4.64	2.13	1.19	2.68	41	58	17.05	70.6	7.74
1751	1009	M	36	Control	87	166.5	62.4	22.2	78	93	81	110	80	5.9	5.69	176	533	93.7	30.9	330	106	21	45	2.1	81.3	49.2	1.53	32.1	10.1	2.5	7.6	24.8	122	27	42.5	3.98	3.42	66	376	19	5.84	1.4	1.55	3.8	12.1	61	48.93	19.8	12.8
1754	144	F	31	Control	82	175	58	18.9	73	86	73	110	76	6.2	5.46	158	496	90.8	28.9	319	136	12	34	2.8	77.4	47.1	1.55	30.3	5.6	2.6	3	46.4	103	27	11.1	3.8	8.67	72	438	23	3.48	0.51	1.5	1.67	25.2	56	30.89	44.9	13.44
1760	156	F	33	Control	76	165.5	54.5	20	73	90	72	104	69	3.8	4.77	144	437	91.6	30.2	330	180	26	33	1.3	71.1	41.6	1.41	29.5	6	3.3	2.7	55	60	18	7.7	3.72	5.27	52	275	23	3.48	0.73	1.21	1.84	6.6	49	42.32	13.5	14.52
1764	2608	F	41	Control	84	155.5	60.9	25.1	82	99	89	130	80	6.3	4.93	156	460	93.3	31.6	339	170	12	22	1.8	77.1	45.3	1.42	31.8	12.1	3.8	8.3	31.4	63	20	9.6	5.87	4.01	65	290	18	5.61	1.14	1.65	3.7	20.3	56	35.91	36.1	13.1
1776	161	M	49	Control	78	158	51	20.4	76	90	84	119	84	6.4	5.41	171	535	98.9	31.6	320	25	42	40	1	83.8	50.5	1.52	33.3	14.2	6.3	7.9	44.4	96	42	10.1	2.66	4.18	59	419	19	3.49	0.78	1.6	1.8	37.3	78	40.26	48.1	15.11
1789	14	M	41	Control	85	171	58.4	19.8	75	91	77	110	79	5	4.52	148	438	96.9	32.7	338	170	17	35	2.1	71	43.6	1.59	27.4	13.1	6.7	6.4	51.1	118	350	11	3.89	4.05	62	322	15	3.24	0.83	1.36	1.68	15.3	66	50.47	23.3	12.06
1796	1022	M	34	Control	86	162	58.7	22.5	73	84	61	110	80	5.4	4.57	149	443	96.9	32.6	336	101	23	27	1.2	71.8	45.7	1.75	26.1	13.8	4.7	9.1	34.1	96	17	16	2.27	6.29	77	304	24	4.43	0.69	1.81	2.3	27.7	55	27.64	50.1	12
1806	1025	M	43	Control	90	169	59.7	21	75	89	94	111	81	8.1	5.35	155	479	89.5	29	324	151	16	31	1.9	77.6	47	1.54	30.6	19.7	11	8.7	55.8	84	40	14.6	3.51	3.14	65	339	19	4.15	0.85	2.04	2.07	11.5	55	43.1	21.1	13.76
1812	2015	M	44	Control	90	166	54.4	19.6	75	8	75	120	85	4.9	5.09	172	504	99	33.8	341	182	25	41	1.6	83.5	49.2	1.43	34.3	55.3	17	38.3	30.7	90	90	16.8	2.49	4.28	89	414	21	4.84	0.93	2.67	1.98	49.4	66	16.21	75.3	14.15
1820	175	F	40	Control	78	151	46	20.2	61	79	80	100	66	6.5	4.26	136	413	96.9	31.9	329	193	34	43	1.3	74.3	41.9	1.29	32.4	5.2	2.4	2.8	46.2	55	20	10.7	3.25	4.2	59	262	21	3.61	0.78	1.51	1.97	14.1	61	47.16	23	16.62
1841	1132	M	63	Control	84	151	42	18.4	65	80	70	139	79	2.8	4.77	150	465	97.5	31.4	323	114	18	33	1.8	88.1	45.1	1.05	43	8.1	3.6	4.5	44.4	99	34	15.8	2.93	4.15	71	367	22	3.94	0.65	1.91	2.02	10.9	70	58.96	15.6	26.62
1843	963	M	41	Control	83	170	57.4	19.7	70	86	69	92	62	6.7	5.17	176	531	102	34	331	150	27	39	1.4	76.2	49.3	1.83	26.9	10.2	4.1	6.1	40.2	79	50	10.9	3.67	2.92	58	297	21	4.3	1.16	2.04	2.08	27.8	55	27.58	50.2	13.48
1851	2023	F	40	Control	82	158.5	61.8	24.5	73	88	98	116	45	7.1	4.67	137	426	91	29.3	322	186	10	24	2.4	83	45.1	1.19	37.9	6.8	1.5	5.3	22.1	80	29	15	2.26	4.11	63	347	19	5.05	0.71	2.45	2.35	9.2	78	68.3	11.9	16.84
1855	898	M	30	Control	93	171	58.1	19.8	73	83	66	122	88	3.8	5.62	165	513	91.3	29.4	322	138	29	29	1	76	47.1	1.63	28.9	27.6	11.3	16.3	40.9	89	24	15.2	2.67	5.23	72	334	18	3.22	0.56	1.51	1.53	14.2	56	41.66	25.4	12.57
1857	1104	M	31	Control	85	162	53.6	20.6	70	83	69	110	80	4.9	5.64	172	533	94.5	30.5	323	127	23	36	1.6	81.8	50.2	1.59	31.6	13.3	5.5	7.8	41.4	104	22	13.1	2.89	4.2	69	370	22	4.1	0.69	1.45	2.25	11.3	57	45.2	20	14.52
1860	2031	M	41	Control	87	167	68.6	24.7	91	90	76	122	86	4.3	4.76	161	464	97.5	33.8	347	157	32	43	1.3	79.4	46.3	1.4	33.1	7.5	2.9	4.6	38.7	64	246	12.9	3.22	3.65	62	450	19	4.51	1.93	1.79	2.49	26.3	58	31.27	45.7	16.62
1864	12	F	49	Control	79	154	47	19.8	62	82	75	112	69	4.5	4.68	137	433	92	29	316	218	21	32	1.5	78.2	50.3	1.8	27.9	7.1	2.9	4.2	40.8	82	18	11.3	3.72	7.69	64	252	19	5.57	0.53	2.57	3	16.5	60	43.6	27.5	11.47
1868	1027	M	54	Control	86	164	53.6	20.1	66	85	76	111	70	7.7	5.56	166	506	91	29.9	328	105	29	36	1.2	77.9	46.1	1.45	31.8	11.4	5.1	6.3	44.7	96	83	12.7	2.71	4.88	86	360	21	3.9	0.63	1.68	2.01	15.4	55	39.93	27.8	14.91
1883	730	F	56	Control	80	145	44.7	21.4	66	86	61	102	68	6.8	5.19	158	485	93.4	30.4	326	101	10	21	2.1	84.5	48.3	1.33	36.2	13.1	3.9	9.2	29.8	89	3	14	3.8	4.19	46	186	15	4.11	0.94	1.56	2.38	17.9	58	40.57	30.6	21.36
1885	2234	M	67	Control	75	154	56.9	24	81	89	74	136	82	6.4	4.96	175	504	101.4	35.3	347	157	31	36	1.2	74.9	44.3	1.45	30.6	7.2	3.9	3.3	54.2	112	44	17.4	2.58	3.01	56	354	20	5.35	1	1.57	3.49	11.6	50	38.02	23.4	12.89
1891	971	F	47	Control	81	149	50	22.5	66	92	68	135	84	6.6	4.5	143	425	94.4	31.8	336	155	23	28	1.2	71.5	42.6	1.47	28.9	13.5	6.3	7.2	46.7	84	46	10.9	2.56	2.96	54	176	24	3.37	0.82	1.53	1.58	25.2	64	39.23	39.1	13.7
1897	967	M	33	Control	86	162	50	19.1	71	86	68	91	61	4.5	4.66	154	462	99.1	33	333	155	14	32	2.3	70.1	44.4	1.73	25.7	6.3	2.5	3.8	39.7	88	26	7	4.7	2.51	53	400	15	4.01	0.65	2.54	1.46	12.4	58	45.2	21.5	10.25
1900	1163	M	45	Control	86	169	75.8	26.6	95	99	87	133	82	7.8	5.07	156	485	95.7	30.8	322	56	44	30	0.7	76.8	46.4	1.53	30.4	20.5	6.6	13.9	32.2	139	266	15.4	2.88	5.96	78	429	23	5.86	2.5	1.43	3.38	31	57	26.06	54.3	12.76
1908	799	F	35	Control	87	153.5	47.9	20.2	63	83	77	110	70	7	4.56	148	430	94.3	32.5	344	139	48	49	1	81.2	46.5	1.34	34.7	8.4	3.1	5.3	36.9	76	97	27.9	1.29	4.61	90	518	17	3.9	2.58	1.68	1.55	42.5	82	39.42	51.9	12.92
1933	3186	M	38	Control	89	161	60.1	23.1	80	91	60	120	88	6.2	4.89	149	437	89.4	30.5	341	111	16	30	1.9	77.4	48.3	1.66	29.1	14.1	5.9	8.2	41.8	94	45	10.1	2.88	4.14	71	371	20	4.29	0.54	1.77	2.45	17.9	56	38.11	32	14.15
1996	954	F	50	Control	89	150	47.2	20.9	70	85	75	106	71	5.7	5.01	139	438	87.4	27.7	317	178	36	30	0.8	78.8	44	1.26	34.8	5.7	2.4	3.3	42.1	126	44	12.3	2.34	3.85	53	224	24	5.42	0.84	2.07	2.91	16	45	29.34	35.3	16.24
2033	118	F	48	Control	85	144	50.1	24.1	75	87	67	119	84	3.8	4.84	152	456	94.2	31.4	333	117	32	36	1.1	75.6	46.2	1.57	29.4	7.9	3	4.9	38	77	13	15	3.56	2.01	54	203	18	4.96	0.71	2.2	2.57	12.8	67	54.13	19.1	12.33
2042	620	M	36	Control	87	166	48.3	17.4	67	87	90	96	62	7.1	5.55	176	519	93.5	31.7	339	86	27	36	1.3	73.8	47.8	1.84	26	19.1	6.7	12.4	35.1	63	25	30.2	4.4	6.6	76	235	14	4.12	0.72	2.04	2.07	20.3	61	40.54	33.4	7.84
2048	537	M	50	Control	77	159	51	20.2	75	83	58	115	82	4.7	5.13	164	488	95.1	32	336	120	17	30	1.8	77.5	47.8	1.61	29.7	9.9	4.3	5.6	43.4	85	48	10.2	4.12	4.18	67	340	20	4.48	1.23	1.63	2.58	28.8	63	33.78	46	14.56
2110	58	F	46	Control	80	151	50	21.9	71	94	70	128	88	6.6	4.17	123	372	89.2	29.5	331	265	2	24	12	76.5	43.5	1.32	33	5.7	1.9	3.8	33.3	63	34	9.8	2.95	5.34	50	201	25	4.48	0.68	1.79	2.63	21.6	68	46.48	31.7	15.47
2167	2877	F	42	Control	85	149.5	50.3	22.2	68	89	64	130	87	5.7	4.15	124	386	93	29.9	321	170	15	24	1.6	90.4	51.2	1.31	39.2	8.4	3.6	4.8	42.9	98	18	9	5.48	5.64	54	231	19	6.18	2.16	1.72	3.83	8.8	101	92.58	8.7	17.09
2168	2917	M	43	Control	88	178.5	66.5	20.9	72	89	59	130	76	6.4	5.11	157	447	87.5	30.7	351	179	13	24	1.8	76.8	50.2	1.89	26.6	7.5	4.6	2.9	61.3	86	18	12.4	2.79	3.97	81	289	19	3.89	1.43	1.57	2.2	15	59	43.9	25.5	10.98
2176	257	F	43	Control	83	151.5	46.8	20.3	60	86	68	101	66	5	4.76	143	441	92.6	30	324	135	20	27	1.4	75.2	44.3	1.43	30.9	7.1	2.7	4.4	38	59	12	9.6	4.01	5.34	56	200	24	4.42	0.88	1.91	2.19	24.4	57	32.9	42.6	15.59
2181	2075	M	38	Control	88	170	73.4	25.3	89	94	68	126	87	10.3	5.1	167	500	98	32.7	334	136	57	23	0.4	81	49.7	1.59	31.3	10.1	3.7	6.4	36.6	77	127	95.5	2.55	5.33	81	397	15	6.31	1.9	1.12	4.01	18.1	62	44.03	29.1	10.72
2240	2090	F	40	Control	88	155	47.6	20	61	83	59	132	85	5.9	4.51	134	404	89.6	29.7	332	213	17	25	1.5	78.9	49.6	1.69	29.3	5.1	2.4	2.7	47.1	114	36	22.2	2.73	4.72	64	295	19	4.45	0.57	1.38	2.89	5.9	59	52.68	10.1	17.53
2243	2239	M	31	Control	89	165	72.6	26.8	97	89	69	110	77	7	5.24	173	500	95.4	33	346	118	25	33	1.3	76.8	50.2	1.89	26.6	4.3	2.3	2	53.5	120	174	23.1	2.9	2.98	61	346	14	7.03	2.61	1.56	5.04	21	55	33.91	38.2	8.77
2248	598	M	48	Control	86	156	42.6	17.7	61	81	79	101	80	9	5.23	169	491	93.9	32.3	344	169	24	40	1.7	79.2	48	1.54	31.2	10	3.6	6.4	36	130	35	9.2	4.36	4.03	51	232	22	5.08	1.01	2.14	2.86	14.1	62	47.95	22.7	12.69
2274	2072	M	34	Control	88	162	56.3	21.3	74	35	83	112	84	5.7	6.28	179	544	86.6	28.5	329	162	25	25	1	84.5	52.4	1.63	32.1	14.5	6	8.5	41.4	58	16	17.1	3.33	4.07	80	481	21	4.03	1.45	1.37	2.1	32.8	55	21.72	60.2	14.61
2283	2880	M	62	Control	87	168	49.5	17.7	72	88	96	120	80	5.9	6.03	179	525	87.1	29.7	341	104	26	49	1.9	72.8	41.6	1.33	31.2	6	2.4	3.6	40	74	23	11	3.02	2.56	57	260	19	2.84	1.76	1.05	1.24	15.4	44	29.02	34.7	13.37
2299	404	M	40	Control	84	162	55	21	74	88	66	105	75	6.6	4.64	149	434	93.5	32.1	343	194	19	26	1.4	80.4	45.2	1.28	35.2	6.1	2.3	3.8	37.7	98	20	10.4	3.89	5.47	74	300	19	4.16	0.89	1.93	2.07	9.7	50	40.56	19.3	15.44
2300	327	F	42	Control	86	151	46	20.2	64	85	65	112	81	4.5	4.52	127	402	88.9	28.1	316	116	26	27	1	79.9	42.2	1.12	37.7	6.3	2.4	3.9	38.1	85	61	10.6	3.9	5.71	57	205	23	4.91	0.65	1.78	2.71	15.8	47	31.46	33.4	20.33
2307	2843	M	58	Control	77	160	49	19.1	65	79	85	115	75	5	5.21	174	502	96.4	33.4	347	233	8	28	3.5	82	45.5	1.25	36.5	10.5	5.6	4.9	53.3	115	34	8.5	5.04	2.79	56	294	20	3.61	0.74	1.6	1.88	33.2	56	22.52	59.6	17.17
2314	262	M	40	Control	77	174	55.9	18.5	70	84	87	100	67	6.9	5.44	174	521	95.8	32	334	162	24	38	1.6	78.8	48	1.56	30.8	10	5.2	4.8	52	81	31	15.7	3.07	4.85	73	415	21	5.23	1.22	1.43	3	35	48	12.77	73.3	13.6
2333	2065	M	38	Control	90	154	49.9	21.1	72	85	63	99	69	4	5.38	177	531	98.7	32.9	333	85	177	113	0.6	78.1	47.1	1.52	31	11.6	4.4	7.2	37.9	80	97	26	1.64	4.08	83	363	16	4.98	0.98	1.67	2.74	24.6	52	26.95	47.7	13.61
2347	26	M	31	Control	82	173	62	20.7	73	88	65	109	71	5.2	5.6	173	511	91.3	30.9	339	139	18	24	1.3	85.2	50.3	1.44	34.9	20.6	9.3	11.3	45.1	84	24	19.7	2.27	7.49	83	501	24	3.58	0.57	1.37	1.88	13	44	30.59	29.8	17.81
		M	37	Control	87	169.5	57.4	19.7	82	85	60	116	71	5.9	5.63	176	533	94.7	31.3	330	119	21	24	1.1	73	48.3	1.96	24.7	15.5	6.7	8.8	43.2	57	14	21.4	3.45	4.62	63	336	15	3.67	0.35	1.91	1.83	18.5	67	48.72	27.5	12.04
2357	3256	M	47	Control	76	159	50.1	19.8	72	88	69	120	79	5.6	5.18	178	512	98.8	34.4	348	162	26	46	1.8	81.9	51.2	1.67	30.7	10.2	6	4.2	58.8	67	117	14.9	3.22	7.38	92	454	17	4.96	1.29	2.14	2.76	21.9	66	44.47	33	12.44
2365	3273	M	39	Control	82	164.7	49.3	18	69	86	80	131	82	7.1	5.91	178	514	87	30.1	346	195	52	52	1	85.9	47.6	1.24	38.3	11	5.4	5.6	49.1	114	252	14.1	3.24	3.76	79	448	17	3.76	3.18	1.15	1.94	17.9	60	42.05	29.9	16.76
2375	3258	M	39	Control	83	162.5	53.1	19.9	71	94	78	93	64	5.3	4.99	166	473	94.8	33.3	351	227	77	80	1	78	45.8	1.42	32.2	7.2	3.6	3.6	50	119	73	13.1	3.12	6.34	69	352	17	4.95	0.75	1.62	3.24	17.7	56	38.28	31.6	14.38
2377	3051	F	45	Control	81	155.5	62.5	25.9	77	97	60	121	81	5.5	4.9	152	469	95.7	31	324	173	18	27	1.5	81.3	48.8	1.5	32.5	9.1	3.1	6	34.1	106	37	11.4	3.92	3.33	56	255	24	5.38	0.87	2.58	2.73	24.9	65	40.43	38.1	15.42
2379	661	M	47	Control	82	159	51.9	20.6	74	88	52	131	80	5.2	5.26	178	524	99.6	33.8	340	106	21	32	1.5	74.1	47.9	1.83	26.2	11	4.5	6.5	40.9	82	29	11.5	4.7	5.84	76	385	21	4.51	1.37	2.01	2.5	10.3	55	44.65	18.7	12.12
2381	486	M	47	Control	82	164	54.3	20.1	66	82	85	119	81	6	5.26	161	481	91.4	30.6	335	190	7	25	3.6	74.5	44.9	1.52	29.6	9.2	4.5	4.7	48.9	101	27	10.4	2.84	3.65	65	319	27	4.43	2.01	1.26	2.19	24.7	56	31.6	43.9	13.39
2507	2898	M	42	Control	84	164	56.4	20.8	72	87	67	131	88	5.7	5.92	176	513	86.7	29.7	243	216	19	37	1.9	82.5	47.9	1.38	34.6	6	3.2	2.8	53.3	90	28	12.2	4.14	3.46	66	363	19	3.86	0.77	1.86	2.1	15.7	52	36.77	29.9	17.63
2578	2520	M	42	Control	91	168.5	69	24.2	90	97	67	125	85	6	5.67	174	504	88.9	30.7	345	177	22	33	1.5	74.5	44.9	1.52	29.6	8.9	4.3	4.6	48.3	76	59	10.9	2.77	5.25	72	306	19	4.61	1.38	1.64	2.7	35.7	64	28.76	55.4	14.1
Supplementary Table S6: Functional annotation of SNPs correlated with rs1346902 and rs521539 (r2 > 0.8) using data from ENCODE
pos (hg19)	LD (r²) #	variant $	Ref	Alt	AFR freq	AMR freq	ASN freq	EUR freq	histone marks		DNAse	Proteins bound	Motifs changed (*)	GENCODE genes
						freq	freq	freq	Promoter	Enhancer
chr14:34556908	1	rs1346902	G	C	0.68	0.68	0.74	0.59			BLD	TCF12	EWSR1-FLI1, Nanog	EGLN3
chr6:32577380	0.83	rs660895	A	G	0.11	0.31	0.21	0.23	BLD	10 organs	8 organs	POL2,POL24H8		19kb 5' of HLA-DQA1
chr6:32578590	0.86	rs113027967	A	G	0.11	0.31	0.21	0.23	BLD	IPSC, BLD, THYM	5 organs	POL2	4 altered motifs	17kb 5' of HLA-DQA1
chr6:32581973	1	rs521539	G	A	0.11	0.31	0.21	0.23					CIZ,DEC,HDAC2	14kb 5' of HLA-DQA1
chr6:32583529	0.92	rs6941972	G	A	0.11	0.31	0.2	0.23		BLD			4 altered motifs	12kb 5' of HLA-DQA1
chr6:32584693	0.87	rs510205	C	G	0.11	0.3	0.16	0.23					HP1-site-factor	11kb 5' of HLA-DQA1
ENCODE, the Encyclopedia of DNA Elements; LD, linkage disequilibrium; Chr., Chromosome; Pos., Position
#) LD (r2) is based upon 1000 Genomes data and a threshold of r2>0.8 was imposed to identify correlated SNPs
$) Index SNPs are shown in bold.
*) Evidence of alteration in regulatory motif (if >3, only the number is included).
[truncated: 5 more columns]
